# Supplementary material for: A more effective catalysis of the CO2 fixation with aziridines: computational screening of metal-substituted HKUST-1
Source: Royal Society of Chemistry journal article supplement (doi:10.1039/d1na00150g), 2021-01-01
Supplement: d1na00150g1.pdf [file d1na00150g1.pdf]

# Supporting Information

## More effectively catalyzing the CO<sub>2</sub> fixation with aziridines: Computational screening of metal-substituted HKUST-1

Yan Jiang<sup>1</sup>, Tian-ding Hu<sup>1</sup>, Li-ying Yu<sup>1</sup> and Yi-hong Ding<sup>\*2,1</sup>

\*Corresponding author

<sup>1</sup> Laboratory of Theoretical and Computational Chemistry, Institute of Theoretical Chemistry, Jilin University, Changchun 130023, P. R. China.

<sup>2</sup> Key Laboratory of Carbon Materials of Zhejiang Province, College of Chemistry and Materials Engineering, Wenzhou University, Wenzhou 325035, P. R. China.

Tel: 86-13069218826

*E-mail address: yhdd@jlu.edu.cn (Y.H. Ding)*

- 1. Table S1. The energies (Hartrees) of M-HKUST-1 with different spin states. The minimum energies for each M-HKUST-1 are marked green. S2**
- 2. Table S2. Relative Gibbs free energies (kcal/mol) for the stationary points along the reaction pathway for CO<sub>2</sub> fixation on M-HKUST-1 catalysts. S3**
- 3. Table S3. The adsorption energies (kcal/mol) of M-HKUST-1 with NH<sub>3</sub>, H<sub>2</sub>O, aziridine and CO<sub>2</sub>. S4**
- 4. Table S4. The computed strain energies (in kcal/mol) of small-ring systems. S5**
- 5. Table S5. The Coordinates of all stable intermediates and transition states. S7**

**Table S1.** The energies (Hartrees) of M-HKUST-1 with different spin states. The minimum energies for each M-HKUST-1 are marked green.

| M-HKUST-1 | singlet    | triplet    | quintet    | septet     | nonet      | undectet   | 13-et      | 15-et      |
|-----------|------------|------------|------------|------------|------------|------------|------------|------------|
| <b>Fe</b> | -1003.5804 | -1003.6187 | -1003.6170 | -1003.6892 | -1003.6923 | -1003.5696 | -1003.4164 | -1003.2555 |
| <b>Cr</b> | -929.3917  | -929.4450  | -929.4007  | -929.4821  | -929.5166  | -929.3483  | -929.1924  | -929.0746  |
| <b>Ru</b> | -944.4922  | -944.5252  | -944.5034  | -944.4722  | -944.4307  | -944.2990  | -944.1413  | -943.9846  |
| <b>Ti</b> | -873.0618  | -873.0812  | -873.0574  | -872.9157  | -872.7463  | -872.5847  | -872.4244  | -872.2652  |
| <b>W</b>  | -892.4703  | -892.4244  | -892.3563  | -892.3445  | -892.2906  | -892.1250  | -891.9583  | -891.7895  |
| <b>V</b>  | -899.50602 | -899.4972  | -899.5143  | -899.5266  | -899.4064  | -899.2487  | -899.0906  | -898.9115  |
| <b>Mn</b> | -964.5513  | -964.6274  | -964.6200  | -964.6449  | -964.6894  | -964.7448  | -964.5840  | -964.4216  |
| <b>Cu</b> | -1149.0179 | -1149.0489 | -1148.8911 | -1148.7332 | -1148.5716 | -1148.4067 | -1148.2438 | -1148.0614 |
| <b>Sc</b> | -849.9176  | -849.9022  | -849.7432  | -849.5838  | -849.3848  | -849.2599  | -849.0714  | -848.8743  |
| <b>Mo</b> | -891.9087  | -891.8843  | -891.7810  | -891.7754  | -891.8028  | -891.6396  | -891.4882  | -891.3106  |
| <b>Zn</b> | -888.0134  | -887.8988  | -887.6896  | -887.5794  | -887.4066  | -887.2452  | -887.1133  | -886.9128  |
| <b>Zr</b> | -850.0621  | -850.0544  | -850.0087  | -849.8605  | -849.6917  | -849.5231  | -849.3511  | -849.1643  |
| <b>Tc</b> | -916.9132  | -916.9186  | -916.9120  | -916.8672  | -916.8616  | -916.8233  | -916.6643  | -916.5032  |
| <b>Cd</b> | -852.9229  | -852.8036  | -852.6756  | -852.5230  | -852.3683  | -852.2208  | -852.0615  | -851.8721  |
| <b>Rh</b> | -975.7757  | -975.7468  | -975.6921  | -975.6673  | -975.5087  | -975.3602  | -975.2032  | -975.0458  |
| <b>Y</b>  | -832.9032  | -832.8823  | -832.7232  | -832.5637  | -832.3788  | -832.2375  | -832.0185  | -831.8470  |
| <b>Ag</b> | -1048.1770 | -1048.1723 | -1048.0162 | -1047.8594 | -1047.7167 | -1047.5386 | -1047.4069 | -1047.2742 |
| <b>Nb</b> | -869.4452  | -869.4650  | -869.4161  | -869.4015  | -869.2421  | -869.0811  | -868.9212  | -868.7538  |

**Table S2.** Relative Gibbs free energies (kcal/mol) for the stationary points along the reaction pathway for CO<sub>2</sub> fixation on M-HKUST-1 catalysts.

|                        | Cu     | Cr     | Mo     | W      | Ti     | Sc     | Ru     | Fe     | Zn     | Zr     | Cd     | Tc     | Y      | Rh     | Nb     | Ag     | Mn     | V      |
|------------------------|--------|--------|--------|--------|--------|--------|--------|--------|--------|--------|--------|--------|--------|--------|--------|--------|--------|--------|
| <b>cat+reactant</b>    | 0.00   | 0.00   | 0.00   | 0.00   | 0.00   | 0.00   | 0.00   | 0.00   | 0.00   | 0.00   | 0.00   | 0.00   | 0.00   | 0.00   | 0.00   | 0.00   | 0.00   | 0.00   |
| <b>Int<sub>0</sub></b> | -39.00 | -34.57 | -27.92 | -27.89 | -36.04 | -28.68 | -40.34 | -79.88 | -38.60 | -31.84 | -33.36 | -41.16 | -27.60 | -40.98 | -47.57 | -34.96 | -39.24 | -72.05 |
| <b>Int<sub>1</sub></b> | -37.65 | -32.66 | -25.20 | -25.07 | -34.67 | -26.32 | -38.76 | -78.80 | -36.89 | -28.17 | -30.79 | -40.11 | -25.23 | -39.52 | -45.70 | -31.79 | -36.53 | -63.72 |
| <b>Ts<sub>1</sub></b>  | -4.75  | 4.07   | 12.58  | 10.87  | -5.35  | 4.18   | -5.51  | -50.95 | -8.60  | -3.08  | -0.99  | -10.21 | 5.79   | -7.65  | -12.42 | 8.97   | -7.48  | -33.70 |
| <b>Int<sub>2</sub></b> | -10.53 | -0.67  | 12.18  | 10.40  | -5.52  | -2.01  | -15.23 | -53.58 | -12.27 | -10.48 | -3.46  | -11.80 | 1.77   | -12.70 | -20.97 | -6.10  | -10.33 | -34.95 |
| <b>Int<sub>3</sub></b> | -7.34  | 3.50   | 15.50  | 13.48  | -1.90  | 1.82   | -11.52 | -50.13 | -8.61  | -6.74  | 0.38   | -7.98  | 4.19   | -8.43  | -11.37 | -15.44 | -6.64  | -30.91 |
| <b>Ts<sub>2</sub></b>  | -1.69  | 6.08   | 21.58  | 20.01  | 5.05   | 11.13  | 3.07   | -39.57 | -2.97  | 4.36   | 5.06   | 0.80   | 9.14   | -1.52  | -4.14  | 10.67  | -1.64  | -29.64 |
| <b>Int<sub>4</sub></b> | -17.23 | -18.81 | -14.73 | 0.43   | -22.97 | -18.30 | -9.10  | -73.53 | -22.42 | -23.39 | -15.51 | -28.59 | -18.55 | -11.04 | -37.54 | -9.16  | -26.51 | -58.52 |
| <b>Int<sub>5</sub></b> | -27.42 | -25.01 | -15.63 | -15.94 | -27.18 | -24.61 | -23.92 | -74.63 | -34.17 | -28.62 | -28.17 | -28.97 | -24.37 | -24.01 | -36.96 | -21.37 | -38.87 | -54.38 |
| <b>Ts<sub>3</sub></b>  | -12.17 | -10.20 | -1.47  | -1.04  | -7.06  | -8.23  | -9.11  | -54.90 | -17.23 | -13.50 | -10.85 | -13.28 | -9.65  | -9.07  | -21.21 | -8.49  | -21.28 | -41.78 |
| <b>Int<sub>6</sub></b> | -48.19 | -44.81 | -37.88 | -37.45 | -46.28 | -41.45 | -44.93 | -89.12 | -46.49 | -43.84 | -41.59 | -49.14 | -41.87 | -44.79 | -55.55 | -41.76 | -48.75 | -75.53 |
| <b>cat+product</b>     | -13.58 | -13.58 | -13.58 | -13.58 | -13.58 | -13.58 | -13.58 | -13.58 | -13.58 | -13.58 | -13.58 | -13.58 | -13.58 | -13.58 | -13.58 | -13.58 | -13.58 | -13.58 |

**Table S3.** The adsorption energies (kcal/mol) of M-HKUST-1 with NH<sub>3</sub>, H<sub>2</sub>O, aziridine and CO<sub>2</sub>.

| <b>M-HKUST-1</b> | <b>NH<sub>3</sub>-adsorption</b> | <b>H<sub>2</sub>O-adsorption</b> | <b>aziridine-adsorption</b> | <b>CO<sub>2</sub>-adsorption</b> |
|------------------|----------------------------------|----------------------------------|-----------------------------|----------------------------------|
| <b>Cu</b>        | 40.06                            | 30.19                            | 39.00                       | 23.87                            |
| <b>Sc</b>        | 28.94                            | 26.16                            | 28.68                       | 21.04                            |
| <b>Ti</b>        | 34.04                            | 28.58                            | 36.04                       | 22.24                            |
| <b>V</b>         | 71.54                            | 63.04                            | 72.05                       | 23.79                            |
| <b>Cr</b>        | 34.76                            | 28.21                            | 34.57                       | 22.78                            |
| <b>Mn</b>        | 39.81                            | 29.19                            | 39.24                       | 21.31                            |
| <b>Fe</b>        | 80.20                            | 70.97                            | 79.88                       | 17.64                            |
| <b>Zn</b>        | 37.66                            | 29.66                            | 38.60                       | 20.43                            |
| <b>Y</b>         | 29.98                            | 26.41                            | 27.60                       | 22.63                            |
| <b>Zr</b>        | 31.25                            | 28.59                            | 31.84                       | 23.18                            |
| <b>Nb</b>        | 46.47                            | 43.05                            | 47.57                       | 27.55                            |
| <b>Mo</b>        | 28.62                            | 22.61                            | 27.92                       | 21.21                            |
| <b>Tc</b>        | 39.73                            | 31.98                            | 41.16                       | 21.48                            |
| <b>Ru</b>        | 40.47                            | 29.05                            | 40.34                       | 21.49                            |
| <b>Rh</b>        | 41.40                            | 29.11                            | 40.98                       | 22.58                            |
| <b>Ag</b>        | 34.62                            | 28.26                            | 34.96                       | 22.39                            |
| <b>Cd</b>        | 32.35                            | 25.92                            | 33.36                       | 19.17                            |
| <b>W</b>         | 27.76                            | 22.59                            | 27.89                       | 21.54                            |

**Table S4.** The computed strain energies (in kcal/mol) of small-ring systems.

| systems                                                                             | Ring strain energy (kcal/mol) |                                         |                                         |
|-------------------------------------------------------------------------------------|-------------------------------|-----------------------------------------|-----------------------------------------|
|                                                                                     | literature                    |                                         | this work                               |
|                                                                                     | experiment                    | B3LYP/6-311++G(d,p)//<br>B3LYP/6-31G(d) | B3LYP/6-311++G(d,p)//<br>B3LYP/6-31G(d) |
| 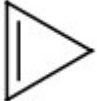   | 54.5                          | 54.0                                    | 54.16                                   |
|    | 27.5                          |                                         | 25.91                                   |
|   | 26.3                          |                                         | 25.64                                   |
|  | 26.3                          |                                         | 26.06                                   |
|  | 26.7                          |                                         | 25.34                                   |
|  |                               |                                         | 25.15                                   |

|                                                                                   |  |  |       |
|-----------------------------------------------------------------------------------|--|--|-------|
| 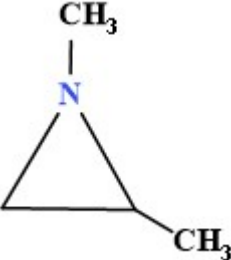 |  |  | 23.68 |
|-----------------------------------------------------------------------------------|--|--|-------|

## S5. The Coordinates of all stable intermediates and transition states.

### Aziridine

|   |             |             |             |
|---|-------------|-------------|-------------|
| C | -2.45349300 | 1.42176700  | 1.29537900  |
| C | -2.58742700 | 1.94728400  | -0.08800700 |
| H | -1.71110100 | 1.85536000  | 1.96132400  |
| H | -3.32652400 | 0.96976900  | 1.75944500  |
| H | -3.56912100 | 1.80579600  | -0.53833200 |
| C | -1.78219200 | 3.12058600  | -0.59437900 |
| H | -1.58026100 | 3.02147300  | -1.66786700 |
| H | -2.33883100 | 4.05433400  | -0.43320500 |
| H | -0.82050400 | 3.19407300  | -0.07724000 |
| N | -1.88276500 | 0.66831600  | 0.15574700  |
| C | -2.79543300 | -0.43723429 | -0.16936171 |
| H | -2.71987572 | -0.66736602 | -1.21158553 |
| H | -2.53063351 | -1.29938557 | 0.40637815  |
| H | -3.80011250 | -0.14967119 | 0.06047860  |

### Oxazolidinone

|   |             |             |             |
|---|-------------|-------------|-------------|
| C | -3.97000400 | 0.82393800  | -0.59854500 |
| C | -3.48050400 | -0.61106400 | -0.35558700 |
| H | -4.20843200 | 1.00580100  | -1.65927200 |
| H | -4.85551200 | 1.04504600  | 0.00237000  |
| H | -3.74831800 | -0.92774500 | 0.65688300  |
| C | -3.92332100 | -1.64193800 | -1.36976400 |
| H | -3.63271900 | -1.34346500 | -2.38438700 |
| H | -3.47529000 | -2.61702500 | -1.14890800 |
| H | -5.01389200 | -1.72834600 | -1.30921300 |
| N | -2.79135000 | 1.59168600  | -0.20107400 |
| C | -1.68009400 | 0.81228300  | -0.21592100 |
| O | -2.01138400 | -0.48020100 | -0.37680000 |

|   |             |            |             |
|---|-------------|------------|-------------|
| O | -0.51710900 | 1.20970300 | -0.09749000 |
| C | -2.74179400 | 3.03691600 | -0.23111000 |
| H | -1.74524800 | 3.35781000 | 0.07907900  |
| H | -2.94233000 | 3.41930300 | -1.24354700 |
| H | -3.49115500 | 3.45023600 | 0.45307200  |

**Cu-HKUST-1**

|    |             |             |             |
|----|-------------|-------------|-------------|
| Cu | 0.00180900  | -0.00236500 | -1.27354000 |
| Cu | -0.00204600 | 0.00228300  | 1.27404200  |
| O  | -1.37562600 | 1.42589500  | -1.14024000 |
| O  | 1.37891200  | -1.42954600 | -1.13387900 |
| O  | -1.42678200 | -1.37926200 | -1.13599000 |
| O  | 1.42930000  | 1.37575000  | -1.13651500 |
| O  | 1.42629800  | 1.37854600  | 1.13643600  |
| O  | -1.42879200 | -1.37567400 | 1.13695700  |
| O  | 1.37593000  | -1.42576900 | 1.13903200  |
| O  | -1.37889100 | 1.42979600  | 1.13272800  |
| C  | -1.76375000 | 1.82820000  | -0.00504300 |
| C  | 1.76442600  | -1.82761700 | 0.00384000  |
| C  | -1.82811200 | -1.76404500 | 0.00073500  |
| C  | 1.82791600  | 1.76392100  | 0.00000800  |
| H  | -2.52805900 | 2.61929000  | -0.00752400 |
| H  | 2.61853200  | 2.52871800  | 0.00018700  |
| H  | -2.61901000 | -2.52857900 | 0.00132400  |
| H  | 2.52973200  | -2.61770400 | 0.00597900  |

**Cu-Int<sub>0</sub>**

|    |             |             |             |
|----|-------------|-------------|-------------|
| Cu | 0.00181100  | -0.00236400 | -1.27354000 |
| Cu | -0.00204800 | 0.00228200  | 1.27404200  |
| O  | -1.37661800 | 1.42493800  | -1.14024000 |
| O  | 1.37990600  | -1.42858600 | -1.13387900 |



|   |             |             |             |
|---|-------------|-------------|-------------|
| O | -1.42582200 | -1.38025400 | -1.13599000 |
| O | 1.42834200  | 1.37674400  | -1.13651500 |
| O | 1.42533800  | 1.37953800  | 1.13643600  |
| O | -1.42783400 | -1.37666800 | 1.13695700  |
| O | 1.37692200  | -1.42481100 | 1.13903200  |
| O | -1.37988600 | 1.42883600  | 1.13272800  |
| C | -1.76502200 | 1.82697200  | -0.00504300 |
| C | 1.76569700  | -1.82638900 | 0.00384000  |
| C | -1.82688400 | -1.76531700 | 0.00073500  |
| C | 1.82668800  | 1.76519300  | 0.00000800  |
| H | -2.52988100 | 2.61753000  | -0.00752400 |
| H | 2.61677200  | 2.53054000  | 0.00018700  |
| H | -2.61725000 | -2.53040100 | 0.00132400  |
| H | 2.53155300  | -2.61594300 | 0.00597900  |
| C | -0.08122929 | 0.44876615  | 4.37187289  |
| C | -0.92097591 | -0.76227629 | 4.12198750  |
| H | -0.44453697 | 1.43664543  | 4.09276818  |
| H | 0.58796250  | 0.43451355  | 5.23454016  |
| H | -0.76954210 | -1.58261119 | 4.83023240  |
| C | -2.30498243 | -0.68988735 | 3.51819736  |
| H | -2.53700527 | -1.60458539 | 2.95785232  |
| H | -3.06514242 | -0.56799315 | 4.30047968  |
| H | -2.37855312 | 0.15662540  | 2.82731221  |
| N | 0.21833674  | -0.45495348 | 3.25956860  |
| C | 1.40395215  | -1.29147831 | 3.40391196  |
| H | 1.29768950  | -2.17965019 | 2.77069881  |
| H | 2.28348308  | -0.73133043 | 3.06658745  |
| H | 1.58192695  | -1.62405544 | 4.44356964  |

**Cu-Int<sub>1</sub>**

|    |             |             |             |
|----|-------------|-------------|-------------|
| Cu | 0.48468200  | 0.23666600  | -3.13758000 |
| Cu | 0.50244100  | 0.24293400  | -0.42100400 |
| O  | -1.00413900 | 1.54466700  | -3.13703100 |
| O  | 1.97262300  | -1.07965000 | -3.13995900 |
| O  | -0.82054300 | -1.24317000 | -3.11611700 |
| O  | 1.78935000  | 1.71029800  | -3.06818500 |
| O  | 2.08563900  | 1.54937800  | -0.81188800 |
| O  | -1.08043000 | -1.04974800 | -0.86194200 |
| O  | 1.78658200  | -1.31962500 | -0.88572000 |
| O  | -0.76663200 | 1.84938800  | -0.89561100 |
| C  | -1.26743600 | 2.08510800  | -2.01777900 |
| C  | 2.25893400  | -1.58939600 | -2.01436200 |
| C  | -1.34164600 | -1.52396200 | -1.99520100 |
| C  | 2.32532000  | 2.00660400  | -1.95699800 |
| H  | -2.03931000 | 2.86025100  | -2.04795700 |
| H  | 3.10734300  | 2.77326100  | -2.04024600 |
| H  | -2.12667900 | -2.28768000 | -2.03910900 |
| H  | 3.02212400  | -2.37322200 | -2.03445400 |
| C  | -1.09546900 | -0.19387400 | 2.23911900  |
| C  | 0.17674000  | -0.84710200 | 2.63822200  |
| H  | -1.72331800 | -0.65440600 | 1.48157600  |
| H  | -1.60202400 | 0.40469000  | 2.99330300  |
| H  | 0.49131900  | -0.61829400 | 3.65653400  |
| C  | 0.61505500  | -2.19356100 | 2.11617600  |
| H  | 1.70881700  | -2.26300500 | 2.06946400  |
| H  | 0.24870900  | -2.97614300 | 2.79318300  |
| H  | 0.22225700  | -2.38453800 | 1.11411700  |
| N  | 0.19601800  | 0.32678300  | 1.72868900  |
| Br | -1.37904100 | -0.02710900 | 5.96760600  |

|                          |             |             |             |
|--------------------------|-------------|-------------|-------------|
| C                        | 0.64904900  | 1.59137800  | 2.32960000  |
| H                        | 1.73771400  | 1.66181800  | 2.23229300  |
| H                        | 0.19439000  | 2.42363100  | 1.78263500  |
| H                        | 0.37104600  | 1.65646900  | 3.39064700  |
| <b>Cu-Ts<sub>1</sub></b> |             |             |             |
| Cu                       | 0.00181100  | -0.00236400 | -1.27354000 |
| Cu                       | -0.00204800 | 0.00228200  | 1.27404200  |
| O                        | -1.37661800 | 1.42493800  | -1.14024000 |
| O                        | 1.37990600  | -1.42858600 | -1.13387900 |
| O                        | -1.42582200 | -1.38025400 | -1.13599000 |
| O                        | 1.42834200  | 1.37674400  | -1.13651500 |
| O                        | 1.42533800  | 1.37953800  | 1.13643600  |
| O                        | -1.42783400 | -1.37666800 | 1.13695700  |
| O                        | 1.37692200  | -1.42481100 | 1.13903200  |
| O                        | -1.37988600 | 1.42883600  | 1.13272800  |
| C                        | -1.76502200 | 1.82697200  | -0.00504300 |
| C                        | 1.76569700  | -1.82638900 | 0.00384000  |
| C                        | -1.82688400 | -1.76531700 | 0.00073500  |
| C                        | 1.82668800  | 1.76519300  | 0.00000800  |
| H                        | -2.52988100 | 2.61753000  | -0.00752400 |
| H                        | 2.61677200  | 2.53054000  | 0.00018700  |
| H                        | -2.61725000 | -2.53040100 | 0.00132400  |
| H                        | 2.53155300  | -2.61594300 | 0.00597900  |
| C                        | -1.62425912 | -0.23965603 | 4.20454873  |
| C                        | -0.36037412 | -0.95614606 | 4.61766992  |
| H                        | -2.35417205 | -0.88284635 | 3.71053274  |
| H                        | -2.08526277 | 0.39920819  | 4.96183405  |
| H                        | 0.33841655  | -0.40330084 | 5.22939433  |
| C                        | 0.10680755  | -2.22319800 | 3.95358971  |

|    |             |             |            |
|----|-------------|-------------|------------|
| H  | 0.61595091  | -2.00698959 | 3.00681878 |
| H  | 0.80272959  | -2.74739794 | 4.61297772 |
| H  | -0.73837232 | -2.88591938 | 3.74615124 |
| N  | -0.72807971 | 0.45283396  | 3.24669658 |
| Br | -1.06588694 | -1.99200048 | 6.97431528 |
| C  | -0.35910865 | 1.80964676  | 3.63944593 |
| H  | 0.52913691  | 2.12952140  | 3.08828523 |
| H  | -1.18629866 | 2.49262018  | 3.39852700 |
| H  | -0.15821883 | 1.87464208  | 4.71938177 |

**Cu-Int<sub>2</sub>**

|    |             |             |             |
|----|-------------|-------------|-------------|
| Cu | 0.48333000  | 0.26467500  | -3.04101500 |
| Cu | 0.54975600  | 0.12016800  | -0.12779200 |
| O  | -1.03307500 | 1.52354500  | -3.12879300 |
| O  | 2.00533200  | -1.01190100 | -3.07045300 |
| O  | -0.76894300 | -1.24794000 | -3.02546400 |
| O  | 1.75063300  | 1.75781900  | -3.05544600 |
| O  | 2.23811000  | 1.40700500  | -0.85582900 |
| O  | -1.20302700 | -1.00543700 | -0.79999500 |
| O  | 1.67968400  | -1.46975600 | -0.86725100 |
| O  | -0.65859800 | 1.93797000  | -0.92737700 |
| C  | -1.23831600 | 2.11087200  | -2.01336500 |
| C  | 2.23180400  | -1.61760400 | -1.98034000 |
| C  | -1.36621900 | -1.50641400 | -1.93289200 |
| C  | 2.36549000  | 1.97144100  | -1.95990300 |
| H  | -2.03931000 | 2.86025100  | -2.04795700 |
| H  | 3.10734300  | 2.77326100  | -2.04024600 |
| H  | -2.12667900 | -2.28768000 | -2.03910900 |
| H  | 3.02212400  | -2.37322200 | -2.03445400 |
| C  | -0.92679500 | 0.19403600  | 2.41513200  |

|    |             |             |            |
|----|-------------|-------------|------------|
| C  | -0.42493300 | -0.77238600 | 3.50013000 |
| H  | -1.60276600 | -0.34377900 | 1.73907500 |
| H  | -1.48750100 | 1.01862700  | 2.88121200 |
| H  | 0.31597700  | -0.28670600 | 4.13666800 |
| C  | 0.05564400  | -2.11396600 | 2.98506200 |
| H  | 0.87069600  | -1.93779800 | 2.27266600 |
| H  | 0.42422700  | -2.74851000 | 3.79748600 |
| H  | -0.74521300 | -2.64102800 | 2.45607200 |
| N  | 0.23264700  | 0.66706300  | 1.68057500 |
| Br | -1.97088700 | -1.10800500 | 4.86617500 |
| C  | 0.65131400  | 1.99577200  | 2.07870100 |
| H  | 1.55144400  | 2.28276100  | 1.52919800 |
| H  | -0.13678100 | 2.74105000  | 1.87082800 |
| H  | 0.86778100  | 2.03761300  | 3.16223500 |

**Cu-Int<sub>3</sub>**

|    |             |             |             |
|----|-------------|-------------|-------------|
| Cu | 0.46237700  | 0.39494900  | -3.08933000 |
| Cu | 0.56960500  | 0.29842200  | -0.17532400 |
| O  | -0.75002600 | 1.94884300  | -3.16926000 |
| O  | 1.68774000  | -1.16957400 | -3.12750600 |
| O  | -1.07026300 | -0.82577800 | -3.08880300 |
| O  | 2.01199000  | 1.59715400  | -3.08353200 |
| O  | 1.77400400  | 2.02909700  | -0.85750500 |
| O  | -0.76717600 | -1.31872600 | -0.88238900 |
| O  | 2.13046800  | -0.86666100 | -0.91907400 |
| O  | -1.19060300 | 1.58571100  | -0.97039100 |
| C  | -1.33553800 | 2.17291200  | -2.05677200 |
| C  | 2.27509300  | -1.41952300 | -2.03219600 |
| C  | -1.31891400 | -1.42982600 | -1.99733100 |
| C  | 2.28559800  | 2.18056100  | -1.98587800 |

|                          |             |             |             |
|--------------------------|-------------|-------------|-------------|
| H                        | -2.05417100 | 3.00146600  | -2.09413100 |
| H                        | 3.09248200  | 2.91447600  | -2.08642000 |
| H                        | -2.14154000 | -2.14646500 | -2.08528300 |
| H                        | 3.00726300  | -2.23200700 | -2.08062800 |
| C                        | -1.16533300 | 0.03143900  | 2.14757500  |
| C                        | -0.72535900 | -1.09535800 | 3.09250700  |
| H                        | -1.74351900 | -0.40422800 | 1.32211500  |
| H                        | -1.82031800 | 0.72819500  | 2.69005500  |
| H                        | -0.14161600 | -0.70056500 | 3.92566600  |
| C                        | -0.05327200 | -2.27687500 | 2.42352000  |
| H                        | 0.89470200  | -1.93888100 | 1.98896000  |
| H                        | 0.15543500  | -3.07716200 | 3.13998100  |
| H                        | -0.66827700 | -2.66611000 | 1.60717900  |
| N                        | 0.01586700  | 0.70230800  | 1.62254900  |
| Br                       | -2.42762700 | -1.78312800 | 4.09182700  |
| C                        | 3.31636100  | 0.21294400  | 3.12161700  |
| O                        | 3.04391300  | 1.24418000  | 3.59912500  |
| O                        | 3.61520100  | -0.82989800 | 2.68161600  |
| C                        | 0.09948500  | 2.09142400  | 2.03688300  |
| H                        | 0.28923900  | 2.16762100  | 3.12374800  |
| H                        | 0.91551500  | 2.59149200  | 1.50785200  |
| H                        | -0.84077700 | 2.63003000  | 1.82268500  |
| <b>Cu-Ts<sub>2</sub></b> |             |             |             |
| Cu                       | 0.00181100  | -0.00236400 | -1.27354000 |
| Cu                       | -0.00204800 | 0.00228200  | 1.27404200  |
| O                        | -1.37661800 | 1.42493800  | -1.14024000 |
| O                        | 1.37990600  | -1.42858600 | -1.13387900 |
| O                        | -1.42582200 | -1.38025400 | -1.13599000 |
| O                        | 1.42834200  | 1.37674400  | -1.13651500 |

|    |             |             |             |
|----|-------------|-------------|-------------|
| O  | 1.42533800  | 1.37953800  | 1.13643600  |
| O  | -1.42783400 | -1.37666800 | 1.13695700  |
| O  | 1.37692200  | -1.42481100 | 1.13903200  |
| O  | -1.37988600 | 1.42883600  | 1.13272800  |
| C  | -1.76502200 | 1.82697200  | -0.00504300 |
| C  | 1.76569700  | -1.82638900 | 0.00384000  |
| C  | -1.82688400 | -1.76531700 | 0.00073500  |
| C  | 1.82668800  | 1.76519300  | 0.00000800  |
| H  | -2.52988100 | 2.61753000  | -0.00752400 |
| H  | 2.61677200  | 2.53054000  | 0.00018700  |
| H  | -2.61725000 | -2.53040100 | 0.00132400  |
| H  | 2.53155300  | -2.61594300 | 0.00597900  |
| C  | -1.32601024 | -0.34963573 | 4.18037555  |
| C  | -0.86160628 | -1.74014956 | 4.62378999  |
| H  | -2.22181122 | -0.45299963 | 3.54949338  |
| H  | -1.61908360 | 0.22276330  | 5.07167690  |
| H  | -0.06595342 | -1.67400863 | 5.36432653  |
| C  | -0.51210795 | -2.70980986 | 3.51582482  |
| H  | 0.37031985  | -2.32739237 | 2.98778247  |
| H  | -0.25803087 | -3.69515420 | 3.91919393  |
| H  | -1.32937222 | -2.80893056 | 2.79595180  |
| N  | -0.26917347 | 0.36792174  | 3.45788616  |
| Br | -2.40927520 | -2.54401820 | 5.75429730  |
| C  | 1.54033980  | 0.48539828  | 4.48650958  |
| O  | 1.44801205  | 1.56369134  | 4.99309418  |
| O  | 2.10050663  | -0.54927090 | 4.28478523  |
| C  | -0.63296418 | 1.79216781  | 3.46680037  |
| H  | -0.75794490 | 2.12204603  | 4.47697866  |
| H  | 0.14300430  | 2.36142242  | 2.99912302  |

|                           |             |             |             |
|---------------------------|-------------|-------------|-------------|
| H                         | -1.54875192 | 1.92973064  | 2.93078798  |
| <b>Cu-Int<sub>4</sub></b> |             |             |             |
| Cu                        | 0.18551400  | -0.74088400 | -3.84670500 |
| Cu                        | 0.18139600  | -0.70708200 | -1.11326800 |
| O                         | -1.09388100 | 0.76906200  | -3.82499700 |
| O                         | 1.46915300  | -2.24403000 | -3.80498500 |
| O                         | -1.32271100 | -2.02296200 | -3.81071100 |
| O                         | 1.68955700  | 0.54970900  | -3.84125000 |
| O                         | 1.54745900  | 0.72878300  | -1.57712500 |
| O                         | -1.17655600 | -2.23340000 | -1.54927400 |
| O                         | 1.67500300  | -2.10104200 | -1.54190800 |
| O                         | -1.31675700 | 0.60922800  | -1.56568700 |
| C                         | -1.58470400 | 1.08193800  | -2.69577000 |
| C                         | 1.95107000  | -2.56482000 | -2.67266300 |
| C                         | -1.64185000 | -2.50881700 | -2.67901900 |
| C                         | 2.00977500  | 1.01987000  | -2.70448300 |
| H                         | -2.34765600 | 1.87415600  | -2.72263100 |
| H                         | 2.79899700  | 1.78716600  | -2.71492000 |
| H                         | -2.43502500 | -3.27377500 | -2.71378300 |
| H                         | 2.71377800  | -3.35931700 | -2.70912800 |
| C                         | 0.77451800  | 0.64247700  | 4.05973900  |
| C                         | -0.05461400 | 1.93006200  | 4.18587600  |
| H                         | 1.78069600  | 0.94565100  | 3.72678100  |
| H                         | 0.88352400  | 0.16641000  | 5.03806000  |
| H                         | -0.82525300 | 1.96719800  | 3.42262100  |
| C                         | 0.75986000  | 3.20530000  | 4.24036600  |
| H                         | 1.28159300  | 3.29133900  | 3.27865600  |
| H                         | 0.12511600  | 4.08554700  | 4.37901700  |
| H                         | 1.50196300  | 3.17832300  | 5.04753800  |



|                          |             |             |             |
|--------------------------|-------------|-------------|-------------|
| N                        | 0.20793300  | -0.32058800 | 3.13351300  |
| Br                       | -1.22920000 | 1.85202900  | 5.93531900  |
| C                        | 0.31409800  | 0.02852900  | 1.75857000  |
| O                        | 0.57958500  | 1.22217100  | 1.50293100  |
| O                        | 0.10708200  | -0.92727900 | 0.92829000  |
| C                        | 0.19510100  | -1.71709400 | 3.53446200  |
| H                        | -0.30103500 | -2.29413300 | 2.75392100  |
| H                        | 1.21144400  | -2.13137800 | 3.67076300  |
| H                        | -0.35462000 | -1.83127700 | 4.47779300  |
| <b>Cu-Ts<sub>3</sub></b> |             |             |             |
| Cu                       | 0.00181100  | -0.00236400 | -1.27354000 |
| Cu                       | -0.00204800 | 0.00228200  | 1.27404200  |
| O                        | -1.37661800 | 1.42493800  | -1.14024000 |
| O                        | 1.37990600  | -1.42858600 | -1.13387900 |
| O                        | -1.42582200 | -1.38025400 | -1.13599000 |
| O                        | 1.42834200  | 1.37674400  | -1.13651500 |
| O                        | 1.42533800  | 1.37953800  | 1.13643600  |
| O                        | -1.42783400 | -1.37666800 | 1.13695700  |
| O                        | 1.37692200  | -1.42481100 | 1.13903200  |
| O                        | -1.37988600 | 1.42883600  | 1.13272800  |
| C                        | -1.76502200 | 1.82697200  | -0.00504300 |
| C                        | 1.76569700  | -1.82638900 | 0.00384000  |
| C                        | -1.82688400 | -1.76531700 | 0.00073500  |
| C                        | 1.82668800  | 1.76519300  | 0.00000800  |
| H                        | -2.52988100 | 2.61753000  | -0.00752400 |
| H                        | 2.61677200  | 2.53054000  | 0.00018700  |
| H                        | -2.61725000 | -2.53040100 | 0.00132400  |
| H                        | 2.53155300  | -2.61594300 | 0.00597900  |
| C                        | -0.17515370 | 0.32809417  | 6.98154920  |

|    |             |             |            |
|----|-------------|-------------|------------|
| C  | -0.55983745 | 1.77616895  | 6.74726491 |
| H  | 0.91279995  | 0.27609094  | 7.17487308 |
| H  | -0.68709370 | -0.06216886 | 7.86145820 |
| H  | -1.53323434 | 1.97741138  | 6.33276329 |
| C  | 0.44383480  | 2.88607483  | 6.89785999 |
| H  | 1.12163019  | 2.86443265  | 6.03712829 |
| H  | -0.05212630 | 3.85781404  | 6.94164626 |
| H  | 1.02760563  | 2.75757980  | 7.81453370 |
| N  | -0.54562314 | -0.48010442 | 5.82965044 |
| Br | -1.75339293 | 2.23442044  | 8.99136483 |
| C  | -0.28456481 | 0.13543303  | 4.60354867 |
| O  | -0.07982801 | 1.38714223  | 4.68315940 |
| O  | -0.29171158 | -0.57623003 | 3.55567370 |
| C  | -0.51097210 | -1.92155817 | 5.96839357 |
| H  | -0.79936429 | -2.36536539 | 5.01449403 |
| H  | 0.49564454  | -2.29126108 | 6.23415502 |
| H  | -1.21302367 | -2.24058956 | 6.74918985 |

**Cu-Int<sub>5</sub>**

|    |             |             |             |
|----|-------------|-------------|-------------|
| Cu | 0.18339400  | -0.74259700 | -3.87486500 |
| Cu | 0.17344600  | -0.73570700 | -1.21245900 |
| O  | -1.09345600 | 0.77644500  | -3.82808300 |
| O  | 1.46412000  | -2.25982200 | -3.81456000 |
| O  | -1.33397800 | -2.02177400 | -3.81380800 |
| O  | 1.70051600  | 0.53678200  | -3.82042900 |
| O  | 1.53002600  | 0.75924400  | -1.56079800 |
| O  | -1.16721600 | -2.24861600 | -1.55415800 |
| O  | 1.68048200  | -2.09386400 | -1.55391900 |
| O  | -1.32997500 | 0.59543100  | -1.57122000 |
| C  | -1.58982200 | 1.08002400  | -2.70047200 |

|    |             |             |             |
|----|-------------|-------------|-------------|
| C  | 1.95154000  | -2.56840500 | -2.68460800 |
| C  | -1.64312700 | -2.51346700 | -2.68611700 |
| C  | 2.00743800  | 1.02688500  | -2.69144500 |
| H  | -2.34765600 | 1.87415600  | -2.72263100 |
| H  | 2.79899700  | 1.78716600  | -2.71492000 |
| H  | -2.43502500 | -3.27377500 | -2.71378300 |
| H  | 2.71377800  | -3.35931700 | -2.70912800 |
| C  | 0.34645600  | 0.85977300  | 3.99331100  |
| C  | -0.47118800 | 1.78403000  | 3.08058900  |
| H  | 1.36278500  | 1.24845200  | 4.17184500  |
| H  | -0.14932000 | 0.71884200  | 4.95727900  |
| H  | -1.53503200 | 1.69399900  | 3.32383100  |
| C  | -0.05307900 | 3.23748600  | 3.05435500  |
| H  | 1.00764400  | 3.33787500  | 2.79098800  |
| H  | -0.64919000 | 3.79628100  | 2.32677100  |
| H  | -0.22667800 | 3.65652600  | 4.05212200  |
| N  | 0.39603600  | -0.35455300 | 3.18367500  |
| Br | -1.43473600 | 2.54659900  | 6.62080600  |
| C  | 0.14496700  | -0.07583300 | 1.87956000  |
| O  | -0.29651300 | 1.18482500  | 1.74437800  |
| O  | 0.28440000  | -0.85589000 | 0.93226900  |
| C  | 1.09710400  | -1.55123900 | 3.60758500  |
| H  | 1.07224300  | -2.28413900 | 2.79608700  |
| H  | 2.15081800  | -1.31854100 | 3.84955200  |
| H  | 0.61553700  | -1.97194300 | 4.49693100  |

**Cr-HKUST-1**

|    |           |          |           |
|----|-----------|----------|-----------|
| Cr | 0.001153  | 0.000016 | -1.227546 |
| Cr | -0.001073 | 0.000007 | 1.227662  |
| O  | 0.661373  | 1.887448 | -1.128399 |

|   |           |           |           |
|---|-----------|-----------|-----------|
| O | -0.657030 | -1.888020 | -1.129762 |
| O | -1.886349 | 0.659893  | -1.130763 |
| O | 1.889217  | -0.658485 | -1.127757 |
| O | 1.886895  | -0.658365 | 1.130527  |
| O | -1.889703 | 0.656761  | 1.127516  |
| O | -0.659815 | -1.887984 | 1.128520  |
| O | 0.655263  | 1.888711  | 1.129876  |
| C | 0.846322  | 2.428668  | 0.000928  |
| C | -0.846423 | -2.428591 | -0.000802 |
| C | -2.428625 | 0.846301  | -0.002133 |
| C | 2.428650  | -0.846415 | 0.001886  |
| H | 1.207278  | 3.466225  | 0.001333  |
| H | 3.466163  | -1.207495 | 0.003030  |
| H | -3.466156 | 1.207332  | -0.003180 |
| H | -1.207557 | -3.466086 | -0.001271 |

**Cr-Int<sub>0</sub>**

|    |             |             |             |
|----|-------------|-------------|-------------|
| Cr | 0.00142300  | -0.00056300 | -1.42449200 |
| Cr | -0.00142600 | 0.00056800  | 1.42450700  |
| O  | 1.41783600  | 1.43657000  | -1.13278400 |
| O  | -1.41503700 | -1.43786500 | -1.13416300 |
| O  | -1.43589000 | 1.41606900  | -1.13514200 |
| O  | 1.43856400  | -1.41680000 | -1.13204600 |
| O  | 1.43694400  | -1.41497300 | 1.13501600  |
| O  | -1.43963200 | 1.41570900  | 1.13191400  |
| O  | -1.41674400 | -1.43764600 | 1.13289800  |
| O  | 1.41394000  | 1.43894700  | 1.13427300  |
| C  | 1.81109900  | 1.83946500  | 0.00099000  |
| C  | -1.81102900 | -1.83953200 | -0.00088000 |
| C  | -1.83952400 | 1.81104300  | -0.00219600 |

|   |             |             |             |
|---|-------------|-------------|-------------|
| C | 1.83951800  | -1.81103700 | 0.00207400  |
| H | 2.58218600  | 2.62298100  | 0.00150500  |
| H | 2.62286400  | -2.58229700 | 0.00326900  |
| H | -2.62287300 | 2.58230000  | -0.00338100 |
| H | -2.58234300 | -2.62282500 | -0.00139500 |
| C | 1.09947142  | 0.18367324  | 4.34105149  |
| C | -0.13676431 | 0.98165574  | 4.60408390  |
| H | 1.86491278  | 0.56263855  | 3.66556485  |
| H | 1.47362642  | -0.45420568 | 5.14437840  |
| H | -0.57887233 | 0.83420523  | 5.59418048  |
| C | -0.37773343 | 2.34448124  | 3.99587563  |
| H | -1.45126038 | 2.53199631  | 3.86598469  |
| H | 0.03055174  | 3.13523216  | 4.63827990  |
| H | 0.09843079  | 2.41546085  | 3.01223530  |
| N | -0.17431359 | -0.17943147 | 3.71711517  |
| C | -0.82671820 | -1.38074049 | 4.22457706  |
| H | -1.90175901 | -1.32078129 | 4.02014598  |
| H | -0.42526816 | -2.25675269 | 3.70249601  |
| H | -0.68651980 | -1.52992238 | 5.31143485  |

**Cr-Int<sub>1</sub>**

|    |             |             |             |
|----|-------------|-------------|-------------|
| Cr | 0.08731200  | 0.53568500  | -3.44254700 |
| Cr | 0.12002100  | 0.61313700  | -0.50384500 |
| O  | 1.52195400  | 1.95525800  | -3.19101300 |
| O  | -1.35227600 | -0.89689700 | -3.34885100 |
| O  | -1.33787600 | 1.96035900  | -3.21726700 |
| O  | 1.50392300  | -0.90524300 | -3.28692600 |
| O  | 1.61410400  | -0.75958400 | -1.02413800 |
| O  | -1.34577700 | 2.04390800  | -0.94549900 |
| O  | -1.30409000 | -0.82583200 | -1.08487400 |

|                          |             |             |             |
|--------------------------|-------------|-------------|-------------|
| O                        | 1.52115700  | 2.09601700  | -0.92257900 |
| C                        | 1.91055400  | 2.41920700  | -2.07575400 |
| C                        | -1.71828400 | -1.26067200 | -2.18943400 |
| C                        | -1.73697200 | 2.39009800  | -2.09116400 |
| C                        | 1.95155600  | -1.22561900 | -2.14219000 |
| H                        | 2.68287700  | 3.19922500  | -2.13557900 |
| H                        | 2.72355500  | -2.00605300 | -2.13381500 |
| H                        | -2.52218200 | 3.15854400  | -2.14046500 |
| H                        | -2.48165200 | -2.04658100 | -2.13847900 |
| C                        | -1.35771800 | -0.44607200 | 2.22384500  |
| C                        | -0.09353600 | -1.20433600 | 2.35798300  |
| H                        | -2.06077700 | -0.69073200 | 1.43089100  |
| H                        | -1.77732500 | -0.03716900 | 3.14093900  |
| H                        | 0.28094600  | -1.22641100 | 3.38393600  |
| C                        | 0.24991800  | -2.41058300 | 1.51922900  |
| H                        | 1.33294500  | -2.48702600 | 1.36369500  |
| H                        | -0.07946900 | -3.30968600 | 2.05586500  |
| H                        | -0.23862300 | -2.38938900 | 0.54130100  |
| N                        | -0.08332900 | 0.16020000  | 1.74599400  |
| Br                       | -0.36051900 | -1.00872300 | 5.93647400  |
| C                        | 0.46702800  | 1.21451700  | 2.62429700  |
| H                        | 1.54612600  | 1.29217600  | 2.44796600  |
| H                        | -0.00002200 | 2.17361100  | 2.36798400  |
| H                        | 0.29301700  | 0.99111900  | 3.68521900  |
| <b>Cr-Ts<sub>1</sub></b> |             |             |             |
| Cr                       | 0.00142300  | -0.00056300 | -1.42449200 |
| Cr                       | -0.00142600 | 0.00056800  | 1.42450700  |
| O                        | 1.41783600  | 1.43657000  | -1.13278400 |
| O                        | -1.41503700 | -1.43786500 | -1.13416300 |

|    |             |             |             |
|----|-------------|-------------|-------------|
| O  | -1.43589000 | 1.41606900  | -1.13514200 |
| O  | 1.43856400  | -1.41680000 | -1.13204600 |
| O  | 1.43694400  | -1.41497300 | 1.13501600  |
| O  | -1.43963200 | 1.41570900  | 1.13191400  |
| O  | -1.41674400 | -1.43764600 | 1.13289800  |
| O  | 1.41394000  | 1.43894700  | 1.13427300  |
| C  | 1.81109900  | 1.83946500  | 0.00099000  |
| C  | -1.81102900 | -1.83953200 | -0.00088000 |
| C  | -1.83952400 | 1.81104300  | -0.00219600 |
| C  | 1.83951800  | -1.81103700 | 0.00207400  |
| H  | 2.58218600  | 2.62298100  | 0.00150500  |
| H  | 2.62286400  | -2.58229700 | 0.00326900  |
| H  | -2.62287300 | 2.58230000  | -0.00338100 |
| H  | -2.58234300 | -2.62282500 | -0.00139500 |
| C  | -1.13008064 | 0.06905772  | 4.22714351  |
| C  | 0.05174254  | -0.56738491 | 4.84767007  |
| H  | -1.80532175 | -0.62732209 | 3.72752057  |
| H  | -1.66931473 | 0.80094647  | 4.83354139  |
| H  | 0.67926597  | 0.05440597  | 5.47036055  |
| C  | 0.57172420  | -1.91069262 | 4.41198060  |
| H  | 1.20117132  | -1.81855083 | 3.51886557  |
| H  | 1.16708414  | -2.35127952 | 5.21529581  |
| H  | -0.25452753 | -2.58963198 | 4.18196148  |
| N  | -0.10128913 | 0.60101748  | 3.35078085  |
| Br | -0.96863444 | -1.29352669 | 7.20480159  |
| C  | 0.24424535  | 1.99450351  | 3.61561141  |
| H  | 1.20181963  | 2.23733602  | 3.14746404  |
| H  | -0.53083409 | 2.64614518  | 3.18741412  |
| H  | 0.30817574  | 2.19420985  | 4.69583029  |

**Cr-Int<sub>2</sub>**

|    |             |             |             |
|----|-------------|-------------|-------------|
| Cr | 0.09072500  | 0.63520100  | -3.29981500 |
| Cr | 0.13565200  | 0.37235800  | -0.11826000 |
| O  | 1.42249500  | 2.12107900  | -3.20741600 |
| O  | -1.21399500 | -0.87435100 | -3.08685400 |
| O  | -1.44172300 | 1.97042300  | -3.36610600 |
| O  | 1.63840900  | -0.72779000 | -3.25810800 |
| O  | 1.40591800  | -1.01366900 | -1.02775000 |
| O  | -1.20422900 | 2.04671000  | -1.12296500 |
| O  | -1.44928200 | -0.93423600 | -0.81749100 |
| O  | 1.72036800  | 1.87169800  | -0.96254800 |
| C  | 1.94325500  | 2.39417000  | -2.07474900 |
| C  | -1.71372900 | -1.28159900 | -1.99299100 |
| C  | -1.72824900 | 2.39893700  | -2.19558200 |
| C  | 1.92770300  | -1.25189700 | -2.14425400 |
| H  | 2.68287700  | 3.19922500  | -2.13557900 |
| H  | 2.72355500  | -2.00605300 | -2.13381500 |
| H  | -2.52218200 | 3.15854400  | -2.14046500 |
| H  | -2.48165200 | -2.04658100 | -2.13847900 |
| C  | -1.02472900 | 0.02492600  | 2.60473200  |
| C  | -0.05810200 | -0.48061700 | 3.68604100  |
| H  | -1.40811100 | -0.84222100 | 2.04601700  |
| H  | -1.89275800 | 0.51062100  | 3.08599700  |
| H  | 0.38391800  | 0.35138500  | 4.23477200  |
| C  | 0.98438000  | -1.47466200 | 3.21332200  |
| H  | 1.58308600  | -0.99925000 | 2.42759300  |
| H  | 1.65024500  | -1.78029400 | 4.02695400  |
| H  | 0.51023900  | -2.36827200 | 2.79138700  |
| N  | -0.30780000 | 0.92210600  | 1.72630400  |



|                           |             |             |             |
|---------------------------|-------------|-------------|-------------|
| Br                        | -1.15890500 | -1.42534900 | 5.22648600  |
| C                         | -0.39226900 | 2.31166000  | 2.13108400  |
| H                         | 0.11817300  | 2.94274000  | 1.39538500  |
| H                         | -1.44123600 | 2.66502700  | 2.20598000  |
| H                         | 0.08264900  | 2.50770700  | 3.11247200  |
| <b>Cr-Int<sub>3</sub></b> |             |             |             |
| Cr                        | -0.27862400 | 0.66993000  | -3.43213100 |
| Cr                        | -0.18591500 | 0.88214000  | -0.24869800 |
| O                         | 0.28728300  | 2.65380000  | -3.37512000 |
| O                         | -0.83870500 | -1.29396300 | -3.53249200 |
| O                         | -2.18515300 | 1.24267500  | -3.27885500 |
| O                         | 1.63751000  | 0.13947000  | -3.23808700 |
| O                         | 1.72478200  | -0.04661000 | -0.96459900 |
| O                         | -2.13277700 | 1.67147100  | -1.03632900 |
| O                         | -1.07588200 | -1.02652700 | -1.30881000 |
| O                         | 0.61556500  | 2.58093900  | -1.13886700 |
| C                         | 0.62121100  | 3.14675300  | -2.25900900 |
| C                         | -1.12927200 | -1.69854400 | -2.35511900 |
| C                         | -2.67308800 | 1.61641500  | -2.16498200 |
| C                         | 2.18961100  | -0.13074800 | -2.12448200 |
| H                         | 0.95776200  | 4.19005800  | -2.24998500 |
| H                         | 3.21664700  | -0.48366200 | -2.24828800 |
| H                         | -3.71567200 | 1.93116500  | -2.25449800 |
| H                         | -1.45707300 | -2.74225300 | -2.25258900 |
| C                         | 0.10000600  | -1.23432400 | 1.79321100  |
| C                         | 0.69214200  | -1.14497300 | 3.20638800  |
| H                         | 0.92228500  | -1.39087700 | 1.08258100  |
| H                         | -0.56202300 | -2.11400200 | 1.72221300  |
| H                         | -0.06416800 | -0.85699600 | 3.93606200  |

|                          |             |             |             |
|--------------------------|-------------|-------------|-------------|
| C                        | 1.95144100  | -0.30726000 | 3.32152900  |
| H                        | 1.73205900  | 0.69791900  | 2.94123700  |
| H                        | 2.29686400  | -0.22632100 | 4.35769100  |
| H                        | 2.75692700  | -0.72728900 | 2.70925400  |
| N                        | -0.60750800 | -0.00137000 | 1.48659000  |
| Br                       | 1.17734000  | -3.08151400 | 3.88683200  |
| C                        | -0.45338300 | 2.63895600  | 3.25729600  |
| O                        | -0.07371500 | 3.25804500  | 2.34046800  |
| O                        | -0.83209400 | 2.08777000  | 4.21956800  |
| C                        | -2.01132900 | -0.08764700 | 1.86644100  |
| H                        | -2.15780200 | -0.17814100 | 2.95860100  |
| H                        | -2.54468700 | 0.81466600  | 1.54243000  |
| H                        | -2.51576700 | -0.95472600 | 1.39693400  |
| <b>Cr-Ts<sub>2</sub></b> |             |             |             |
| Cr                       | 0.00115300  | 0.00001600  | -1.22754600 |
| Cr                       | -0.00107300 | 0.00000700  | 1.22766200  |
| O                        | 0.66137300  | 1.88744800  | -1.12839900 |
| O                        | -0.65703000 | -1.88802000 | -1.12976200 |
| O                        | -1.88634900 | 0.65989300  | -1.13076300 |
| O                        | 1.88921700  | -0.65848500 | -1.12775700 |
| O                        | 1.88689500  | -0.65836500 | 1.13052700  |
| O                        | -1.88970300 | 0.65676100  | 1.12751600  |
| O                        | -0.65981500 | -1.88798400 | 1.12852000  |
| O                        | 0.65526300  | 1.88871100  | 1.12987600  |
| C                        | 0.84632200  | 2.42866800  | 0.00092800  |
| C                        | -0.84642300 | -2.42859100 | -0.00080200 |
| C                        | -2.42862500 | 0.84630100  | -0.00213300 |
| C                        | 2.42865000  | -0.84641500 | 0.00188600  |
| H                        | 1.20727800  | 3.46622500  | 0.00133300  |

|                           |             |             |             |
|---------------------------|-------------|-------------|-------------|
| H                         | 3.46616300  | -1.20749500 | 0.00303000  |
| H                         | -3.46615600 | 1.20733200  | -0.00318000 |
| H                         | -1.20755700 | -3.46608600 | -0.00127100 |
| C                         | 1.14968837  | -0.91239133 | 3.84318188  |
| C                         | 2.02919119  | 0.26150236  | 4.28393638  |
| H                         | 1.72799763  | -1.56315606 | 3.16996612  |
| H                         | 0.89039499  | -1.50822921 | 4.72957622  |
| H                         | 1.54373026  | 0.84944613  | 5.06142096  |
| C                         | 2.57005993  | 1.14022934  | 3.17701412  |
| H                         | 1.72546931  | 1.64996309  | 2.69681743  |
| H                         | 3.24044275  | 1.90861484  | 3.57492853  |
| H                         | 3.09572653  | 0.55331913  | 2.41861186  |
| N                         | -0.07660656 | -0.45034674 | 3.18250104  |
| Br                        | 3.62710416  | -0.56074045 | 5.32802523  |
| C                         | -1.18049412 | 0.92410572  | 4.29538820  |
| O                         | -1.98338937 | 0.20797075  | 4.81536725  |
| O                         | -0.67219997 | 1.98681354  | 4.10223273  |
| C                         | -1.02356395 | -1.57458331 | 3.19874344  |
| H                         | -1.17831931 | -1.89601729 | 4.20752041  |
| H                         | -1.95588904 | -1.26172749 | 2.77709055  |
| H                         | -0.62576508 | -2.38432669 | 2.62344202  |
| <b>Cr-Int<sub>4</sub></b> |             |             |             |
| Cr                        | -0.65297400 | 0.15260200  | 1.24510200  |
| Cr                        | -0.66527400 | 0.14790400  | 4.22585800  |
| O                         | -2.01297100 | -1.39810800 | 1.80386800  |
| O                         | 0.62438500  | 1.68583500  | 1.85802600  |
| O                         | 0.85668700  | -1.19560600 | 1.80265900  |
| O                         | -2.22067800 | 1.48980200  | 1.78708100  |
| O                         | -2.00544600 | 1.64893000  | 4.04771400  |

|    |             |             |             |
|----|-------------|-------------|-------------|
| O  | 0.67748600  | -1.35321700 | 4.06583400  |
| O  | 0.84943200  | 1.49259300  | 4.10997900  |
| O  | -2.17043600 | -1.19787800 | 4.06357000  |
| C  | -2.48208700 | -1.68416400 | 2.92933800  |
| C  | 1.13004300  | 1.97539700  | 2.96659900  |
| C  | 1.15267400  | -1.66387700 | 2.92804800  |
| C  | -2.50013800 | 1.95610600  | 2.91682300  |
| H  | -3.26381400 | -2.45270600 | 2.95348400  |
| H  | -3.27277200 | 2.73252300  | 2.95522300  |
| H  | 1.92091100  | -2.44374300 | 2.94859900  |
| H  | 1.91227900  | 2.74115200  | 2.95057900  |
| C  | 0.36985300  | 1.06231200  | -4.03035000 |
| C  | 1.68175300  | 0.36719700  | -4.39068700 |
| H  | 0.66190700  | 2.03520700  | -3.60479000 |
| H  | -0.20935700 | 1.25397900  | -4.94127700 |
| H  | 2.08426600  | -0.14196400 | -3.51785700 |
| C  | 2.70020700  | 1.27961200  | -5.04766600 |
| H  | 2.98520600  | 2.05372700  | -4.32219200 |
| H  | 3.60159100  | 0.73354100  | -5.34059400 |
| H  | 2.28674000  | 1.77107000  | -5.93692000 |
| N  | -0.45478200 | 0.34896700  | -3.07938000 |
| Br | 1.30219400  | -1.21525200 | -5.68882900 |
| C  | -0.07615500 | 0.44142700  | -1.71776500 |
| O  | 1.05754700  | 0.90472600  | -1.46868500 |
| O  | -0.94502400 | 0.02238600  | -0.86746400 |
| C  | -1.81075100 | 0.00036300  | -3.46338600 |
| H  | -2.25633100 | -0.57820800 | -2.65462000 |
| H  | -2.44149600 | 0.89144600  | -3.63620700 |
| H  | -1.80262500 | -0.60213200 | -4.38023800 |

**Cr-Ts<sub>3</sub>**

|    |             |             |             |
|----|-------------|-------------|-------------|
| Cr | -0.00139400 | 0.00055800  | -1.41863400 |
| Cr | 0.00140700  | -0.00057200 | 1.41864600  |
| O  | -1.41783700 | -1.41946100 | -1.13316000 |
| O  | 1.41522300  | 1.42062900  | -1.13458900 |
| O  | 1.41880600  | -1.41612700 | -1.13560500 |
| O  | -1.42130600 | 1.41692900  | -1.13240700 |
| O  | -1.41978700 | 1.41509700  | 1.13547200  |
| O  | 1.42231800  | -1.41592600 | 1.13226300  |
| O  | 1.41682600  | 1.42047200  | 1.13328600  |
| O  | -1.41421000 | -1.42164200 | 1.13471200  |
| C  | -1.81229600 | -1.81766100 | 0.00101700  |
| C  | 1.81212200  | 1.81783400  | -0.00089400 |
| C  | 1.81781100  | -1.81216100 | -0.00223300 |
| C  | -1.81779500 | 1.81214200  | 0.00210300  |
| H  | -2.58787200 | -2.59710300 | 0.00151300  |
| H  | -2.59683000 | 2.58812600  | 0.00325200  |
| H  | 2.59685300  | -2.58814000 | -0.00337200 |
| H  | 2.58822100  | 2.59675500  | -0.00139200 |
| C  | -0.40184069 | 0.47256009  | -6.93319635 |
| C  | -0.42444262 | 1.98869654  | -6.89524680 |
| H  | -1.44473516 | 0.11137650  | -6.96123715 |
| H  | 0.10330640  | 0.12313044  | -7.83342770 |
| H  | 0.49107066  | 2.49820978  | -6.64482357 |
| C  | -1.70597342 | 2.75959320  | -7.04539834 |
| H  | -2.26985085 | 2.68678240  | -6.10828704 |
| H  | -1.50725002 | 3.80988759  | -7.26731305 |
| H  | -2.31214142 | 2.34700105  | -7.85753653 |

|    |             |             |             |
|----|-------------|-------------|-------------|
| N  | 0.31077404  | -0.01012077 | -5.76356116 |
| Br | 0.38016477  | 2.45314699  | -9.33571840 |
| C  | -0.00611366 | 0.64669647  | -4.58261894 |
| O  | -0.58570640 | 1.76759422  | -4.76080400 |
| O  | 0.30032146  | 0.14614728  | -3.45943607 |
| C  | 0.71311614  | -1.42182249 | -5.68533644 |
| H  | 1.61236294  | -1.50512951 | -5.11147660 |
| H  | -0.06350542 | -1.98853328 | -5.21565805 |
| H  | 0.88335204  | -1.79936942 | -6.67193567 |

**Cr-Int<sub>5</sub>**

|    |             |             |             |
|----|-------------|-------------|-------------|
| Cr | -0.67234400 | 0.14416800  | 1.34484200  |
| Cr | -0.67031000 | 0.14165500  | 4.27784200  |
| O  | -2.06129200 | -1.33940200 | 1.80571700  |
| O  | 0.69406900  | 1.63701900  | 1.81143700  |
| O  | 0.80128600  | -1.23460800 | 1.81574100  |
| O  | -2.16822400 | 1.52655500  | 1.80284600  |
| O  | -2.04947500 | 1.61140100  | 4.07188600  |
| O  | 0.70851400  | -1.32651000 | 4.08443600  |
| O  | 0.79872300  | 1.52009100  | 4.07882000  |
| O  | -2.13996200 | -1.23652100 | 4.07554500  |
| C  | -2.48983600 | -1.67846600 | 2.93801700  |
| C  | 1.13723300  | 1.96843200  | 2.94051300  |
| C  | 1.14639100  | -1.67066000 | 2.94338200  |
| C  | -2.49867700 | 1.95822700  | 2.93640400  |
| H  | -3.26381400 | -2.45270600 | 2.95348400  |
| H  | -3.27277200 | 2.73252300  | 2.95522300  |
| H  | 1.92091100  | -2.44374300 | 2.94859900  |
| H  | 1.91227900  | 2.74115200  | 2.95057900  |
| C  | 0.41950000  | 0.48720600  | -4.11153700 |

|    |             |             |             |
|----|-------------|-------------|-------------|
| C  | 1.64674500  | 0.09898100  | -3.27593000 |
| H  | 0.43839900  | 1.54718000  | -4.41412800 |
| H  | 0.35500400  | -0.13669400 | -5.00694100 |
| H  | 1.89181300  | -0.95281500 | -3.44870800 |
| C  | 2.87149700  | 0.96548900  | -3.45677000 |
| H  | 2.63993100  | 2.02202800  | -3.27310800 |
| H  | 3.67001700  | 0.65448100  | -2.77315200 |
| H  | 3.21626500  | 0.83240000  | -4.48845900 |
| N  | -0.66128700 | 0.25577400  | -3.15013000 |
| Br | 2.23448500  | -1.19048200 | -6.57810000 |
| C  | -0.18458000 | 0.20807000  | -1.88768200 |
| O  | 1.15517300  | 0.19987200  | -1.87886000 |
| O  | -0.86871400 | 0.17351300  | -0.85186000 |
| C  | -2.06163900 | 0.41608000  | -3.47382200 |
| H  | -2.65612100 | 0.16598700  | -2.59194000 |
| H  | -2.28189000 | 1.45255000  | -3.77295200 |
| H  | -2.32951400 | -0.25207000 | -4.30094200 |

**Ru-HKUST-1**

|    |             |             |             |
|----|-------------|-------------|-------------|
| Ru | 0.00107500  | 0.00038300  | -1.17697600 |
| Ru | -0.00084500 | -0.00021700 | 1.17744000  |
| O  | -0.00818500 | 2.06253000  | -1.13007600 |
| O  | 0.01044300  | -2.06185100 | -1.13104900 |
| O  | -2.07971700 | -0.00890800 | -1.13568200 |
| O  | 2.08159200  | 0.00955200  | -1.13271500 |
| O  | 2.08044600  | 0.00842000  | 1.13574500  |
| O  | -2.08191400 | -0.00979300 | 1.13278000  |
| O  | 0.00734300  | -2.06278200 | 1.12915300  |
| O  | -0.01059400 | 2.06239600  | 1.13012500  |
| C  | -0.01247500 | 2.63932800  | 0.00023200  |

|                           |             |             |             |
|---------------------------|-------------|-------------|-------------|
| C                         | 0.01159500  | -2.63917800 | -0.00101000 |
| C                         | -2.64761600 | -0.01215200 | -0.00189500 |
| C                         | 2.64782900  | 0.01152100  | 0.00193000  |
| H                         | -0.01829300 | 3.73544800  | 0.00012000  |
| H                         | 3.74549400  | 0.01658400  | 0.00235800  |
| H                         | -3.74528000 | -0.01766500 | -0.00307400 |
| H                         | 0.01662800  | -3.73530300 | -0.00161700 |
| <b>Ru-Int<sub>0</sub></b> |             |             |             |
| Ru                        | 0.00011000  | 0.00004300  | -1.14147500 |
| Ru                        | -0.00009300 | -0.00003300 | 1.14148100  |
| O                         | -0.16971700 | 2.08592700  | -1.12834800 |
| O                         | 0.16991500  | -2.08585700 | -1.12842900 |
| O                         | -2.08593600 | -0.16974100 | -1.12853400 |
| O                         | 2.08611100  | 0.16981200  | -1.12825300 |
| O                         | 2.08597900  | 0.16970600  | 1.12853400  |
| O                         | -2.08612300 | -0.16979800 | 1.12825200  |
| O                         | 0.16960600  | -2.08593900 | 1.12833900  |
| O                         | -0.16983900 | 2.08588100  | 1.12842100  |
| C                         | -0.21696600 | 2.66148800  | 0.00005500  |
| C                         | 0.21687300  | -2.66148900 | -0.00005200 |
| C                         | -2.66155000 | -0.21695200 | -0.00019100 |
| C                         | 2.66156600  | 0.21692400  | 0.00018600  |
| H                         | -0.30668100 | 3.75474700  | 0.00005600  |
| H                         | 3.75487800  | 0.30626800  | 0.00023800  |
| H                         | -3.75484600 | -0.30648000 | -0.00028500 |
| H                         | 0.30640000  | -3.75476300 | -0.00009200 |
| C                         | 0.00275233  | 1.12318510  | 3.67364069  |
| C                         | -1.12648465 | 0.37963898  | 4.31098199  |
| H                         | -0.19459598 | 1.86927050  | 2.90539100  |



|                           |             |             |             |
|---------------------------|-------------|-------------|-------------|
| H                         | 0.89194378  | 1.31336313  | 4.27811276  |
| H                         | -0.94725737 | 0.06572169  | 5.34385463  |
| C                         | -2.57569127 | 0.63698890  | 3.96623871  |
| H                         | -3.17871143 | -0.26965624 | 4.10355204  |
| H                         | -2.99427083 | 1.42425399  | 4.60629485  |
| H                         | -2.67180578 | 0.95089053  | 2.92146767  |
| N                         | -0.28709042 | -0.26291350 | 3.30163040  |
| C                         | 0.65695499  | -1.27143058 | 3.76849685  |
| H                         | 0.15208275  | -2.24297762 | 3.81645833  |
| H                         | 1.48463790  | -1.34837989 | 3.05425044  |
| H                         | 1.07895947  | -1.04844285 | 4.76617383  |
| <b>Ru-Int<sub>1</sub></b> |             |             |             |
| Ru                        | 0.46654000  | 0.12686300  | -2.77522500 |
| Ru                        | 0.46067600  | 0.12309100  | -0.34818500 |
| O                         | 0.29907200  | 2.20623100  | -2.70641100 |
| O                         | 0.63934100  | -1.94756100 | -2.70602900 |
| O                         | -1.61870000 | -0.04171900 | -2.72232200 |
| O                         | 2.55016000  | 0.29563800  | -2.70451500 |
| O                         | 2.57440400  | 0.30078600  | -0.43205000 |
| O                         | -1.63550700 | -0.04654800 | -0.45214400 |
| O                         | 0.64183600  | -1.97568200 | -0.43755000 |
| O                         | 0.29920900  | 2.22886600  | -0.43760800 |
| C                         | 0.25184200  | 2.78214100  | -1.57233400 |
| C                         | 0.68642100  | -2.52656700 | -1.57219700 |
| C                         | -2.18920600 | -0.08938500 | -1.58682000 |
| C                         | 3.12237000  | 0.34312900  | -1.56974800 |
| H                         | 0.16074900  | 3.88260400  | -1.58831700 |
| H                         | 4.22230800  | 0.43412500  | -1.58813500 |
| H                         | -3.28741600 | -0.17862300 | -1.58865800 |

|                          |             |             |             |
|--------------------------|-------------|-------------|-------------|
| H                        | 0.77383000  | -3.62690600 | -1.58846500 |
| C                        | -0.90247000 | 0.70447700  | 2.52513800  |
| C                        | -0.34913000 | -0.62905200 | 2.83477300  |
| H                        | -1.73925500 | 0.78312600  | 1.83858200  |
| H                        | -0.84184000 | 1.47392400  | 3.29019700  |
| H                        | 0.12213300  | -0.70408100 | 3.81263100  |
| C                        | -0.97709800 | -1.90892300 | 2.34859900  |
| H                        | -0.22627300 | -2.69741100 | 2.21997300  |
| H                        | -1.69640600 | -2.22053800 | 3.11449900  |
| H                        | -1.49848900 | -1.77022900 | 1.39873600  |
| N                        | 0.37748100  | 0.28523900  | 1.89193600  |
| Br                       | -2.16961600 | -0.43893600 | 5.83729200  |
| C                        | 1.58099900  | 0.92073300  | 2.44752000  |
| H                        | 2.44743700  | 0.28214500  | 2.25311400  |
| H                        | 1.73722500  | 1.88463500  | 1.95249700  |
| H                        | 1.48271800  | 1.08174800  | 3.53026200  |
| <b>Ru-Ts<sub>1</sub></b> |             |             |             |
| Ru                       | 0.00011000  | 0.00004300  | -1.14147500 |
| Ru                       | -0.00009300 | -0.00003300 | 1.14148100  |
| O                        | -0.16971700 | 2.08592700  | -1.12834800 |
| O                        | 0.16991500  | -2.08585700 | -1.12842900 |
| O                        | -2.08593600 | -0.16974100 | -1.12853400 |
| O                        | 2.08611100  | 0.16981200  | -1.12825300 |
| O                        | 2.08597900  | 0.16970600  | 1.12853400  |
| O                        | -2.08612300 | -0.16979800 | 1.12825200  |
| O                        | 0.16960600  | -2.08593900 | 1.12833900  |
| O                        | -0.16983900 | 2.08588100  | 1.12842100  |
| C                        | -0.21696600 | 2.66148800  | 0.00005500  |
| C                        | 0.21687300  | -2.66148900 | -0.00005200 |

|                           |             |             |             |
|---------------------------|-------------|-------------|-------------|
| C                         | -2.66155000 | -0.21695200 | -0.00019100 |
| C                         | 2.66156600  | 0.21692400  | 0.00018600  |
| H                         | -0.30668100 | 3.75474700  | 0.00005600  |
| H                         | 3.75487800  | 0.30626800  | 0.00023800  |
| H                         | -3.75484600 | -0.30648000 | -0.00028500 |
| H                         | 0.30640000  | -3.75476300 | -0.00009200 |
| C                         | -1.14275750 | 0.29503848  | 3.94606538  |
| C                         | -0.65266726 | -1.02468683 | 4.39878508  |
| H                         | -2.05076079 | 0.25453446  | 3.34240329  |
| H                         | -1.18316810 | 1.08823009  | 4.69664313  |
| H                         | 0.16083996  | -1.03337438 | 5.11032111  |
| C                         | -1.01373779 | -2.30730799 | 3.69936184  |
| H                         | -0.37609339 | -2.47065185 | 2.82239169  |
| H                         | -0.88584840 | -3.14762753 | 4.38594249  |
| H                         | -2.05600786 | -2.28740562 | 3.36794614  |
| N                         | 0.07516346  | 0.22428965  | 3.15798681  |
| Br                        | -2.12142755 | -1.35896161 | 6.60231036  |
| C                         | 1.16678839  | 1.04480683  | 3.67416431  |
| H                         | 2.11481919  | 0.72537536  | 3.23339315  |
| H                         | 0.98917945  | 2.09489520  | 3.40120385  |
| H                         | 1.23612468  | 0.97772502  | 4.77030985  |
| <b>Ru-Int<sub>2</sub></b> |             |             |             |
| Ru                        | 0.47662700  | 0.12947400  | -2.79277800 |
| Ru                        | 0.45280100  | 0.13045600  | -0.28869500 |
| O                         | 0.34805800  | 2.22338800  | -2.71803700 |
| O                         | 0.69107900  | -1.95949600 | -2.71623100 |
| O                         | -1.61641700 | -0.05582900 | -2.69539600 |
| O                         | 2.57452300  | 0.28326800  | -2.72428700 |
| O                         | 2.58264800  | 0.31425900  | -0.43967000 |

|                           |             |             |             |
|---------------------------|-------------|-------------|-------------|
| O                         | -1.66503200 | -0.04259400 | -0.41480200 |
| O                         | 0.59815900  | -1.98712300 | -0.44150800 |
| O                         | 0.27593200  | 2.23926600  | -0.44255300 |
| C                         | 0.25951200  | 2.78315900  | -1.57918300 |
| C                         | 0.68486300  | -2.52660100 | -1.57854700 |
| C                         | -2.18895800 | -0.09194400 | -1.56145000 |
| C                         | 3.12355600  | 0.34462600  | -1.57909700 |
| H                         | 0.16074900  | 3.88260400  | -1.58831700 |
| H                         | 4.22230800  | 0.43412500  | -1.58813500 |
| H                         | -3.28741600 | -0.17862300 | -1.58865800 |
| H                         | 0.77383000  | -3.62690600 | -1.58846500 |
| C                         | -0.72378900 | 0.08613500  | 2.58417900  |
| C                         | -0.55446500 | -1.17923100 | 3.43510100  |
| H                         | -1.60604600 | -0.02811200 | 1.94543300  |
| H                         | -0.89381300 | 0.95349400  | 3.24569300  |
| H                         | 0.36119500  | -1.14108300 | 4.02559100  |
| C                         | -0.70163800 | -2.48529900 | 2.68460700  |
| H                         | 0.02765800  | -2.49611000 | 1.86618800  |
| H                         | -0.52886700 | -3.34769700 | 3.33754000  |
| H                         | -1.70042300 | -2.57027000 | 2.24185800  |
| N                         | 0.46227200  | 0.26195600  | 1.77031300  |
| Br                        | -2.00199000 | -1.16300700 | 4.98384200  |
| C                         | 1.49429200  | 1.02978200  | 2.43736800  |
| H                         | 2.39135700  | 1.06411000  | 1.81365000  |
| H                         | 1.16881700  | 2.07184600  | 2.63303500  |
| H                         | 1.77840400  | 0.59750100  | 3.41558200  |
| <b>Ru-Int<sub>3</sub></b> |             |             |             |
| Ru                        | -0.57390900 | 0.18157300  | 0.21177900  |
| Ru                        | -2.73982300 | -0.78383300 | -0.32977200 |

|    |             |             |             |
|----|-------------|-------------|-------------|
| O  | -0.36529300 | 0.61937800  | -1.86217700 |
| O  | -0.99661100 | -0.33484800 | 2.22539300  |
| O  | 0.26596700  | -1.74685700 | -0.12548400 |
| O  | -1.57434100 | 2.05467200  | 0.48508700  |
| O  | -3.58270700 | 1.10883500  | -0.00144900 |
| O  | -1.77046400 | -2.62212500 | -0.62247400 |
| O  | -3.01509200 | -1.25814900 | 1.71714500  |
| O  | -2.39622700 | -0.28149700 | -2.35957600 |
| C  | -1.30898200 | 0.29620500  | -2.64261300 |
| C  | -2.07986000 | -0.92462000 | 2.50042000  |
| C  | -0.51702600 | -2.68066500 | -0.45930200 |
| C  | -2.82818500 | 2.07059400  | 0.32481300  |
| H  | -1.16341200 | 0.55150900  | -3.69885400 |
| H  | -3.32930200 | 3.03273800  | 0.48930700  |
| H  | -0.05450600 | -3.66007200 | -0.63025200 |
| H  | -2.22024600 | -1.17905900 | 3.55765000  |
| C  | 2.44273000  | 0.13192000  | 0.91470500  |
| C  | 3.44808200  | 0.63457400  | -0.12950800 |
| H  | 2.21406400  | -0.91858900 | 0.71047800  |
| H  | 2.89387100  | 0.19148500  | 1.91958600  |
| H  | 3.64426800  | 1.70038900  | -0.01403800 |
| C  | 3.12914100  | 0.25840700  | -1.56062300 |
| H  | 2.12698900  | 0.63465000  | -1.79828800 |
| H  | 3.85352800  | 0.68705900  | -2.26137200 |
| H  | 3.11465200  | -0.83014700 | -1.68445600 |
| N  | 1.24367100  | 0.94156800  | 0.82539200  |
| Br | 5.35842500  | -0.16103400 | 0.32918400  |
| C  | 0.86999500  | 3.99031800  | -1.90155900 |
| O  | 1.85820200  | 3.94085800  | -1.27758800 |

|                          |             |             |             |
|--------------------------|-------------|-------------|-------------|
| O                        | -0.10089200 | 4.08219600  | -2.54714300 |
| C                        | 1.27930400  | 2.08604400  | 1.71517400  |
| H                        | 2.15714400  | 2.73103900  | 1.52739500  |
| H                        | 0.38146600  | 2.69355600  | 1.57958700  |
| H                        | 1.32618900  | 1.77693500  | 2.77819900  |
| <b>Ru-Ts<sub>2</sub></b> |             |             |             |
| Ru                       | -0.60526900 | 0.22012700  | 0.24220800  |
| Ru                       | -2.71567800 | -0.74213300 | -0.29737500 |
| O                        | -0.38981400 | 0.66024900  | -1.81867200 |
| O                        | -0.98584200 | -0.30302200 | 2.26800400  |
| O                        | 0.23386400  | -1.71613200 | -0.06350500 |
| O                        | -1.59432800 | 2.07019800  | 0.52591900  |
| O                        | -3.59966800 | 1.13290000  | 0.03634200  |
| O                        | -1.78235600 | -2.59490400 | -0.61484400 |
| O                        | -2.98635100 | -1.23244000 | 1.73349400  |
| O                        | -2.41042100 | -0.23939500 | -2.31521400 |
| C                        | -1.32186800 | 0.33730800  | -2.60498300 |
| C                        | -2.06539100 | -0.89778600 | 2.53798300  |
| C                        | -0.53171900 | -2.65283900 | -0.42292200 |
| C                        | -2.84421400 | 2.09615300  | 0.36540400  |
| H                        | -1.16879600 | 0.58289600  | -3.66255500 |
| H                        | -3.33468600 | 3.06412500  | 0.52560600  |
| H                        | -0.05989000 | -3.62868500 | -0.59395300 |
| H                        | -2.22563000 | -1.14767200 | 3.59394900  |
| C                        | 2.47713100  | 0.16187000  | 0.85816500  |
| C                        | 3.35050200  | 0.03943200  | -0.39456400 |
| H                        | 2.13249700  | -0.83939400 | 1.14078200  |
| H                        | 3.13138800  | 0.51160200  | 1.66897800  |
| H                        | 3.82888700  | 0.97849000  | -0.64310400 |

|    |            |             |             |
|----|------------|-------------|-------------|
| C  | 2.75544600 | -0.63831800 | -1.60799300 |
| H  | 1.87398400 | -0.06784200 | -1.91148900 |
| H  | 3.46899300 | -0.65400200 | -2.43846200 |
| H  | 2.44246600 | -1.65782000 | -1.37560800 |
| N  | 1.34409500 | 1.10895600  | 0.74061600  |
| Br | 5.03050100 | -1.09081900 | 0.20300800  |
| C  | 1.49512588 | 2.56912237  | -0.49970222 |
| O  | 2.15971753 | 3.33951566  | 0.10431310  |
| O  | 0.82375306 | 2.24188246  | -1.41065073 |
| C  | 1.19260400 | 1.78609700  | 2.03722600  |
| H  | 2.08630900 | 2.38313600  | 2.27430600  |
| H  | 0.33601200 | 2.46251600  | 1.99937700  |
| H  | 1.03699700 | 1.06634900  | 2.85689800  |

**Ru-Int<sub>4</sub>**

|    |             |             |            |
|----|-------------|-------------|------------|
| Ru | 0.42454000  | -0.57623400 | 0.99125500 |
| Ru | 0.43355500  | -0.57959400 | 3.33388000 |
| O  | 0.26650700  | 1.52413300  | 1.06204400 |
| O  | 0.60829700  | -2.69310200 | 1.04888900 |
| O  | -1.66667400 | -0.78949100 | 1.06890200 |
| O  | 2.54608000  | -0.39969700 | 1.04745300 |
| O  | 2.53162700  | -0.41784000 | 3.31520100 |
| O  | -1.66331700 | -0.73572800 | 3.33511100 |
| O  | 0.59782300  | -2.67888400 | 3.31707000 |
| O  | 0.26854800  | 1.51642800  | 3.32939000 |
| C  | 0.22110500  | 2.07885400  | 2.19185400 |
| C  | 0.65002300  | -3.24394100 | 2.18253900 |
| C  | -2.22390800 | -0.80596800 | 2.19667500 |
| C  | 3.09747100  | -0.36376100 | 2.18060800 |
| H  | 0.13062700  | 3.17175500  | 2.19366000 |

|    |             |             |             |
|----|-------------|-------------|-------------|
| H  | 4.19218600  | -0.27672400 | 2.19384200  |
| H  | -3.31753800 | -0.88947200 | 2.19331900  |
| H  | 0.74370800  | -4.33775500 | 2.19351200  |
| C  | -1.09711000 | -0.13232300 | -4.28787100 |
| C  | -1.39500800 | 1.33072600  | -4.61484200 |
| H  | -2.03467200 | -0.53905900 | -3.87817200 |
| H  | -0.87039200 | -0.68114500 | -5.21043800 |
| H  | -1.23052500 | 1.94970500  | -3.73633300 |
| C  | -2.76330100 | 1.55442800  | -5.23071900 |
| H  | -3.52404100 | 1.27746100  | -4.48720000 |
| H  | -2.91477100 | 2.60247000  | -5.50607100 |
| H  | -2.90902900 | 0.93574200  | -6.12533900 |
| N  | -0.02518000 | -0.33682300 | -3.33617700 |
| Br | 0.03485900  | 2.05744100  | -5.94167500 |
| C  | -0.35854400 | -0.12714500 | -1.97559100 |
| O  | -1.41171600 | 0.48034900  | -1.72415500 |
| O  | 0.51125300  | -0.60155500 | -1.13983200 |
| C  | 1.08977500  | -1.18591600 | -3.72008100 |
| H  | 1.84859000  | -1.13526500 | -2.93758700 |
| H  | 0.79460200  | -2.24469800 | -3.84166500 |
| H  | 1.51863900  | -0.83022300 | -4.66560900 |

**Ru-Ts<sub>3</sub>**

|    |             |             |             |
|----|-------------|-------------|-------------|
| Ru | 0.00011000  | 0.00004300  | -1.14147500 |
| Ru | -0.00009300 | -0.00003300 | 1.14148100  |
| O  | -0.16971700 | 2.08592700  | -1.12834800 |
| O  | 0.16991500  | -2.08585700 | -1.12842900 |
| O  | -2.08593600 | -0.16974100 | -1.12853400 |
| O  | 2.08611100  | 0.16981200  | -1.12825300 |
| O  | 2.08597900  | 0.16970600  | 1.12853400  |



|    |             |             |             |
|----|-------------|-------------|-------------|
| O  | -2.08612300 | -0.16979800 | 1.12825200  |
| O  | 0.16960600  | -2.08593900 | 1.12833900  |
| O  | -0.16983900 | 2.08588100  | 1.12842100  |
| C  | -0.21696600 | 2.66148800  | 0.00005500  |
| C  | 0.21687300  | -2.66148900 | -0.00005200 |
| C  | -2.66155000 | -0.21695200 | -0.00019100 |
| C  | 2.66156600  | 0.21692400  | 0.00018600  |
| H  | -0.30668100 | 3.75474700  | 0.00005600  |
| H  | 3.75487800  | 0.30626800  | 0.00023800  |
| H  | -3.75484600 | -0.30648000 | -0.00028500 |
| H  | 0.30640000  | -3.75476300 | -0.00009200 |
| C  | -1.03003682 | 0.19033380  | -6.54826767 |
| C  | -1.62795075 | 1.55139589  | -6.24860080 |
| H  | -1.84796447 | -0.55213387 | -6.60707008 |
| H  | -0.52413591 | 0.20320742  | -7.51394163 |
| H  | -0.95911814 | 2.33888329  | -5.94472886 |
| C  | -3.11673265 | 1.75407288  | -6.18243115 |
| H  | -3.48820905 | 1.31871038  | -5.24798009 |
| H  | -3.36786428 | 2.81630997  | -6.20994485 |
| H  | -3.61156996 | 1.26291082  | -7.02592739 |
| N  | -0.06443321 | -0.16861532 | -5.52061573 |
| Br | -1.34931403 | 2.62585469  | -8.58064999 |
| C  | -0.47316098 | 0.15895335  | -4.22601011 |
| O  | -1.43785620 | 0.98487083  | -4.17852934 |
| O  | 0.14083617  | -0.36144140 | -3.24787201 |
| C  | 0.80800908  | -1.29790126 | -5.76920567 |
| H  | 1.44995630  | -1.43422861 | -4.89778277 |
| H  | 0.24345314  | -2.23291856 | -5.93535530 |
| H  | 1.42686194  | -1.10641405 | -6.65501268 |

**Ru-Int<sub>5</sub>**

|    |             |             |             |
|----|-------------|-------------|-------------|
| Ru | 0.43507100  | -0.57901600 | 1.01324700  |
| Ru | 0.43568500  | -0.58059300 | 3.33208500  |
| O  | 0.28214600  | 1.51932800  | 1.06027400  |
| O  | 0.60043000  | -2.68701900 | 1.05589700  |
| O  | -1.66441100 | -0.75377500 | 1.05867600  |
| O  | 2.54093100  | -0.41769500 | 1.05647800  |
| O  | 2.52869300  | -0.41142200 | 3.32010800  |
| O  | -1.65529100 | -0.74957100 | 3.32183400  |
| O  | 0.60595700  | -2.67474100 | 3.31973300  |
| O  | 0.26428700  | 1.50877900  | 3.32300900  |
| C  | 0.22506200  | 2.07935800  | 2.18960000  |
| C  | 0.65052500  | -3.24457300 | 2.18722000  |
| C  | -2.22464100 | -0.79823500 | 2.18865900  |
| C  | 3.09891500  | -0.36746800 | 2.18758900  |
| H  | 0.13062700  | 3.17175500  | 2.19366000  |
| H  | 4.19218600  | -0.27672400 | 2.19384200  |
| H  | -3.31753800 | -0.88947200 | 2.19331900  |
| H  | 0.74370800  | -4.33775500 | 2.19351200  |
| C  | -0.88110800 | 0.32713500  | -4.26318900 |
| C  | -1.44939600 | 1.34113100  | -3.26218300 |
| H  | -1.63561600 | -0.40901600 | -4.58310100 |
| H  | -0.48795100 | 0.83737500  | -5.14721600 |
| H  | -0.92212800 | 2.29405600  | -3.36051400 |
| C  | -2.94473000 | 1.55189800  | -3.30564400 |
| H  | -3.48068800 | 0.60225700  | -3.18620300 |
| H  | -3.26154500 | 2.23929200  | -2.51299400 |
| H  | -3.18272400 | 1.99399200  | -4.28012500 |

|    |             |             |             |
|----|-------------|-------------|-------------|
| N  | 0.14717500  | -0.32453600 | -3.44815000 |
| Br | -1.42568200 | 2.88690900  | -6.55809800 |
| C  | -0.08225300 | -0.11722800 | -2.13405900 |
| O  | -1.05392200 | 0.77847300  | -1.94514100 |
| O  | 0.52772700  | -0.68221800 | -1.20638000 |
| C  | 1.03704100  | -1.34526700 | -3.95655900 |
| H  | 1.69354000  | -1.67266800 | -3.14799700 |
| H  | 0.46977000  | -2.21001400 | -4.33153000 |
| H  | 1.63656100  | -0.93812500 | -4.77795700 |

**Ti-HKUST-1**

|    |             |             |             |
|----|-------------|-------------|-------------|
| Ti | -0.00005900 | 0.00077100  | 1.42413700  |
| Ti | 0.00007500  | -0.00055000 | -1.32592100 |
| O  | -1.41549700 | -1.39490600 | 1.09307900  |
| O  | 1.41556400  | 1.39605500  | 1.09224500  |
| O  | -1.41699600 | 1.39467400  | 1.09213700  |
| O  | 1.41677300  | -1.39349700 | 1.09309100  |
| O  | 1.48012000  | -1.43354800 | -1.15225600 |
| O  | -1.48016800 | 1.43233700  | -1.15326000 |
| O  | 1.48065200  | 1.43189300  | -1.15312300 |
| O  | -1.48051400 | -1.43299400 | -1.15225100 |
| C  | -1.87061100 | -1.82252400 | -0.01393000 |
| C  | 1.87103600  | 1.82223100  | -0.01516300 |
| C  | -1.87156400 | 1.82170100  | -0.01533000 |
| C  | 1.87116800  | -1.82197900 | -0.01388100 |
| H  | -2.65766000 | -2.58629100 | 0.02895500  |
| H  | 2.65842100  | -2.58553000 | 0.02908800  |
| H  | -2.65933400 | 2.58476700  | 0.02677700  |
| H  | 2.65859700  | 2.58551000  | 0.02697600  |

**Ti-Int<sub>0</sub>**

|    |             |             |             |
|----|-------------|-------------|-------------|
| Ti | 0.00001100  | -0.00025500 | 1.43151600  |
| Ti | 0.00000200  | 0.00017500  | -1.34116700 |
| O  | 1.42439300  | 1.40235700  | 1.09473200  |
| O  | -1.42442000 | -1.40275600 | 1.09442400  |
| O  | 1.42509800  | -1.40205200 | 1.09431900  |
| O  | -1.42505900 | 1.40162000  | 1.09463500  |
| O  | -1.48980300 | 1.44301000  | -1.15132500 |
| O  | 1.48987900  | -1.44257400 | -1.15165400 |
| O  | -1.49013900 | -1.44226100 | -1.15154200 |
| O  | 1.49006400  | 1.44269600  | -1.15121800 |
| C  | 1.87977200  | 1.83115500  | -0.01184700 |
| C  | -1.87996100 | -1.83099900 | -0.01230000 |
| C  | 1.88011300  | -1.83086300 | -0.01240400 |
| C  | -1.88001300 | 1.83090200  | -0.01193600 |
| H  | 2.66675200  | 2.59497800  | 0.03146200  |
| H  | -2.66688800 | 2.59483100  | 0.03141300  |
| H  | 2.66715700  | -2.59463300 | 0.03065900  |
| H  | -2.66687100 | -2.59490800 | 0.03073900  |
| C  | -0.42829386 | -1.37016730 | -3.79644746 |
| C  | -1.06166172 | -0.18558270 | -4.45207341 |
| H  | -0.96869041 | -1.93166824 | -3.03586503 |
| H  | 0.27820489  | -1.95960267 | -4.38435993 |
| H  | -0.73558341 | 0.00191343  | -5.47969714 |
| C  | -2.46774256 | 0.27149817  | -4.13696947 |
| H  | -2.56996968 | 1.35460850  | -4.28159064 |
| H  | -3.19513212 | -0.22901984 | -4.78893051 |
| H  | -2.72074287 | 0.04493627  | -3.09582619 |
| N  | -0.03848624 | -0.00908638 | -3.42338105 |
| C  | 1.27816536  | 0.43377692  | -3.86676955 |

|                           |             |             |             |
|---------------------------|-------------|-------------|-------------|
| H                         | 1.29131813  | 1.52836013  | -3.91982174 |
| H                         | 2.03043724  | 0.11538848  | -3.13612329 |
| H                         | 1.56485159  | 0.03347759  | -4.85709380 |
| <b>Ti-Int<sub>1</sub></b> |             |             |             |
| Ti                        | 0.11983300  | 0.53723400  | -0.54790900 |
| Ti                        | 0.11588800  | 0.55153000  | -3.52036800 |
| O                         | 1.64336700  | 2.02329400  | -0.86453400 |
| O                         | -1.38698700 | -0.92354500 | -0.91151700 |
| O                         | 1.60648900  | -0.88411700 | -0.95436200 |
| O                         | -1.37346900 | 1.99702900  | -0.92382700 |
| O                         | -1.30163600 | 1.95971400  | -3.17565700 |
| O                         | 1.54630100  | -0.85938900 | -3.20556300 |
| O                         | -1.30674100 | -0.84209000 | -3.16518000 |
| O                         | 1.51542100  | 1.94344900  | -3.11697900 |
| C                         | 1.99511400  | 2.38276500  | -2.01681700 |
| C                         | -1.76236500 | -1.28119300 | -2.05678000 |
| C                         | 1.99512000  | -1.27492900 | -2.08604300 |
| C                         | -1.75713300 | 2.38076200  | -2.06041000 |
| H                         | 2.78313700  | 3.14585800  | -2.11340600 |
| H                         | -2.55050300 | 3.14571100  | -2.11345500 |
| H                         | 2.78354200  | -2.04375300 | -2.11420900 |
| H                         | -2.55048600 | -2.04402800 | -2.11412900 |
| C                         | -1.28899800 | -0.28963700 | 2.21545200  |
| C                         | -0.00418300 | -0.99135600 | 2.40575300  |
| H                         | -1.98947300 | -0.63235700 | 1.45885100  |
| H                         | -1.70708000 | 0.20480700  | 3.08950700  |
| H                         | 0.38497200  | -0.89599300 | 3.42146100  |
| C                         | 0.36211800  | -2.26889200 | 1.69217700  |
| H                         | 1.44432400  | -2.33739800 | 1.53324400  |

|                          |             |             |              |
|--------------------------|-------------|-------------|--------------|
| H                        | 0.05799900  | -3.10874300 | 2.33010400   |
| H                        | -0.13641000 | -2.36655000 | 0.72431700   |
| N                        | -0.03518500 | 0.31584900  | 1.66230900   |
| Br                       | -0.37818800 | -0.48933200 | 5.91535600   |
| C                        | 0.47755400  | 1.46896900  | 2.43865100   |
| H                        | 1.54934500  | 1.57917700  | 2.24169200   |
| H                        | -0.03671400 | 2.37767200  | 2.10479600   |
| H                        | 0.31884600  | 1.32579900  | 3.51535500   |
| <b>Ti-Ts<sub>1</sub></b> |             |             |              |
| Ti                       | 0.62029411  | 2.98772608  | -9.01613415  |
| Ti                       | 0.62028511  | 2.98815608  | -11.78881715 |
| O                        | 2.04467611  | 4.39033808  | -9.35291815  |
| O                        | -0.80413689 | 1.58522508  | -9.35322615  |
| O                        | 2.04538111  | 1.58592908  | -9.35333115  |
| O                        | -0.80477589 | 4.38960108  | -9.35301515  |
| O                        | -0.86951989 | 4.43099108  | -11.59897515 |
| O                        | 2.11016211  | 1.54540708  | -11.59930415 |
| O                        | -0.86985589 | 1.54572008  | -11.59919215 |
| O                        | 2.11034711  | 4.43067708  | -11.59886815 |
| C                        | 2.50005511  | 4.81913608  | -10.45949715 |
| C                        | -1.25967789 | 1.15698208  | -10.45995015 |
| C                        | 2.50039611  | 1.15711808  | -10.46005415 |
| C                        | -1.25972989 | 4.81888308  | -10.45958615 |
| H                        | 3.28703511  | 5.58295908  | -10.41618815 |
| H                        | -2.04660489 | 5.58281208  | -10.41623715 |
| H                        | 3.28744011  | 0.39334808  | -10.41699115 |
| H                        | -2.04658789 | 0.39307308  | -10.41691115 |
| C                        | -0.84095604 | 2.71092514  | -6.29922874  |
| C                        | 0.23391101  | 1.88536210  | -5.70768420  |

|    |             |             |             |
|----|-------------|-------------|-------------|
| H  | -1.50508757 | 2.16825093  | -6.97373039 |
| H  | -1.39153432 | 3.36329050  | -5.61700010 |
| H  | 0.83410672  | 2.33674551  | -4.93039975 |
| C  | 0.71167993  | 0.60435286  | -6.33651965 |
| H  | 1.42975838  | 0.80430138  | -7.14071626 |
| H  | 1.19797300  | -0.01613291 | -5.57994707 |
| H  | -0.12773599 | 0.04271254  | -6.75663918 |
| N  | 0.29881073  | 3.30861363  | -6.97235936 |
| Br | -1.05386496 | 0.83431425  | -3.61927536 |
| C  | 0.70054940  | 4.60229135  | -6.42799124 |
| H  | 1.71220137  | 4.84951691  | -6.76043357 |
| H  | 0.01186927  | 5.37731314  | -6.79377647 |
| H  | 0.67065084  | 4.60203806  | -5.32801463 |

**Ti-Int<sub>2</sub>**

|    |             |             |             |
|----|-------------|-------------|-------------|
| Ti | 0.11493000  | 0.55124800  | -0.54635700 |
| Ti | 0.11445900  | 0.55157700  | -3.52671000 |
| O  | 1.65128400  | 2.02667800  | -0.86348100 |
| O  | -1.40941000 | -0.93375400 | -0.86328400 |
| O  | 1.58018900  | -0.90077000 | -0.95498000 |
| O  | -1.34359400 | 2.00454300  | -0.96139600 |
| O  | -1.32735300 | 1.96195100  | -3.21954400 |
| O  | 1.56102000  | -0.85281200 | -3.21260900 |
| O  | -1.29119800 | -0.84043200 | -3.12379200 |
| O  | 1.51886700  | 1.94739300  | -3.12389900 |
| C  | 1.99663200  | 2.38115800  | -2.02330500 |
| C  | -1.76263100 | -1.28112500 | -2.02281700 |
| C  | 1.98958300  | -1.27639500 | -2.09171700 |
| C  | -1.75416500 | 2.38097300  | -2.09522000 |
| H  | 2.78313700  | 3.14585800  | -2.11340600 |

|    |             |             |             |
|----|-------------|-------------|-------------|
| H  | -2.55050300 | 3.14571100  | -2.11345500 |
| H  | 2.78354200  | -2.04375300 | -2.11420900 |
| H  | -2.55048600 | -2.04402800 | -2.11412900 |
| C  | -0.59445600 | -0.40025300 | 2.29053900  |
| C  | 0.47456300  | -1.19947900 | 3.04945000  |
| H  | -1.18295000 | -1.09263600 | 1.67598500  |
| H  | -1.28271800 | 0.06808800  | 3.01581400  |
| H  | 1.16104000  | -0.53850900 | 3.57829800  |
| C  | 1.20185100  | -2.24584600 | 2.23207300  |
| H  | 1.66020400  | -1.75180800 | 1.36697700  |
| H  | 1.98242400  | -2.74620800 | 2.81539200  |
| H  | 0.50360700  | -3.00182400 | 1.85520500  |
| N  | 0.03824800  | 0.59775900  | 1.44706700  |
| Br | -0.43015400 | -2.18848400 | 4.69222400  |
| C  | 0.37418400  | 1.80922300  | 2.17976500  |
| H  | 0.81846200  | 2.54316400  | 1.49910400  |
| H  | -0.52202400 | 2.27057600  | 2.64179300  |
| H  | 1.10300900  | 1.64625900  | 2.99715000  |

**Ti-Int<sub>3</sub>**

|    |            |             |             |
|----|------------|-------------|-------------|
| Ti | 0.81501300 | 0.27863900  | -0.19390900 |
| Ti | 3.49473700 | -0.91900200 | 0.21238600  |
| O  | 1.93709700 | 2.11441600  | -0.02197300 |
| O  | 0.23986000 | -1.79074200 | -0.23886600 |
| O  | 0.89809600 | 0.17373600  | 1.89826500  |
| O  | 1.47840300 | 0.06110300  | -2.16471000 |
| O  | 3.51045700 | -0.87004100 | -1.83638400 |
| O  | 2.95787000 | -0.70935200 | 2.17538400  |
| O  | 2.34206100 | -2.57257800 | 0.08060900  |
| O  | 3.92566300 | 1.05490400  | 0.21808200  |



|                          |             |             |             |
|--------------------------|-------------|-------------|-------------|
| C                        | 3.19033800  | 2.09215300  | 0.12957400  |
| C                        | 1.08785000  | -2.71386800 | -0.10435000 |
| C                        | 1.85920000  | -0.24166500 | 2.61212700  |
| C                        | 2.56738700  | -0.43659700 | -2.57159000 |
| H                        | 3.71951600  | 3.05456700  | 0.18639000  |
| H                        | 2.71156000  | -0.49608400 | -3.66388500 |
| H                        | 1.73212800  | -0.19893000 | 3.70734200  |
| H                        | 0.72393300  | -3.74986800 | -0.14314400 |
| C                        | -2.21917700 | 0.20069900  | -0.64741500 |
| C                        | -3.11096900 | 0.51172700  | 0.56157600  |
| H                        | -1.97247100 | -0.86711300 | -0.63424400 |
| H                        | -2.77991400 | 0.40304200  | -1.57589800 |
| H                        | -3.29766100 | 1.58134700  | 0.65499000  |
| C                        | -2.66509200 | -0.11204400 | 1.86740600  |
| H                        | -1.63990200 | 0.21685100  | 2.07548400  |
| H                        | -3.31267400 | 0.18208900  | 2.70080000  |
| H                        | -2.65593700 | -1.20505600 | 1.79434800  |
| N                        | -1.00437200 | 0.99624500  | -0.58579300 |
| Br                       | -5.07317200 | -0.18139400 | 0.16511100  |
| C                        | -0.29980900 | 3.66581900  | 2.69879000  |
| O                        | -1.00896500 | 4.10730500  | 1.87830800  |
| O                        | 0.39776500  | 3.25887500  | 3.54843200  |
| C                        | -1.18320500 | 2.31578800  | -1.17434400 |
| H                        | -1.94307600 | 2.93009500  | -0.65665500 |
| H                        | -0.24042400 | 2.87150300  | -1.13497100 |
| H                        | -1.49505300 | 2.24918600  | -2.23662100 |
| <b>Ti-Ts<sub>2</sub></b> |             |             |             |
| Ti                       | 0.80968000  | 0.28370800  | -0.14544200 |
| Ti                       | 3.29590900  | -0.84913700 | 0.19976100  |

|    |             |             |             |
|----|-------------|-------------|-------------|
| O  | 1.92735700  | 2.05844200  | -0.05908700 |
| O  | 0.23794400  | -1.76895600 | -0.18237500 |
| O  | 0.84735300  | 0.21905400  | 1.92883300  |
| O  | 1.39187800  | 0.04218700  | -2.17372400 |
| O  | 3.43834300  | -0.85390700 | -1.84088100 |
| O  | 2.88151000  | -0.71928200 | 2.20242500  |
| O  | 2.31447900  | -2.63740200 | 0.07347200  |
| O  | 3.94254900  | 1.08942200  | 0.29493400  |
| C  | 3.16862200  | 2.08957000  | 0.14216900  |
| C  | 1.05286400  | -2.72045900 | -0.08322300 |
| C  | 1.78901900  | -0.22590000 | 2.63214000  |
| C  | 2.48424300  | -0.42964400 | -2.57114400 |
| H  | 3.64546600  | 3.06975800  | 0.19575700  |
| H  | 2.63751000  | -0.48089300 | -3.65451800 |
| H  | 1.65807800  | -0.18373900 | 3.71670900  |
| H  | 0.64988300  | -3.73467700 | -0.13377700 |
| C  | -2.28569500 | 0.12873400  | -0.91170400 |
| C  | -3.08726700 | -0.02628500 | 0.38425100  |
| H  | -1.97997500 | -0.87081100 | -1.25944900 |
| H  | -2.97369800 | 0.53472400  | -1.66680800 |
| H  | -3.52817800 | 0.92265200  | 0.68924000  |
| C  | -2.41957300 | -0.74412000 | 1.53479200  |
| H  | -1.55999700 | -0.15024000 | 1.86533400  |
| H  | -3.10556800 | -0.85641500 | 2.38102400  |
| H  | -2.05627100 | -1.72876100 | 1.22758000  |
| N  | -1.12009700 | 1.02580100  | -0.77583400 |
| Br | -4.81944500 | -1.10436200 | -0.11491700 |
| C  | -1.70372100 | 2.72157400  | 0.59182900  |
| O  | -2.39977400 | 3.37658300  | -0.12123200 |

|                           |             |             |             |
|---------------------------|-------------|-------------|-------------|
| O                         | -1.16257800 | 2.46317200  | 1.61923100  |
| C                         | -0.96409200 | 1.76294200  | -2.03884100 |
| H                         | -1.84289300 | 2.39553100  | -2.23863700 |
| H                         | -0.08588600 | 2.41677900  | -1.98443200 |
| H                         | -0.81905800 | 1.08462200  | -2.89448400 |
| <b>Ti-Int<sub>4</sub></b> |             |             |             |
| Ti                        | -0.42358900 | -0.37574900 | 4.38596800  |
| Ti                        | -0.44491500 | -0.56414800 | 1.42252400  |
| O                         | 0.95386800  | 1.02293500  | 3.91357800  |
| O                         | -1.82390600 | -1.80203500 | 4.11107500  |
| O                         | 1.00271300  | -1.80625000 | 4.15738100  |
| O                         | -1.85909600 | 1.00978200  | 3.99636100  |
| O                         | -1.90843800 | 0.95215600  | 1.74086100  |
| O                         | 1.01132100  | -1.98886600 | 1.90962200  |
| O                         | -1.93134000 | -2.04023400 | 1.86541000  |
| O                         | 1.05413100  | 0.96477900  | 1.65496600  |
| C                         | 1.41776600  | 1.38887800  | 2.77971700  |
| C                         | -2.29203900 | -2.31436600 | 3.03692300  |
| C                         | 1.42912300  | -2.29289700 | 3.05568100  |
| C                         | -2.30451100 | 1.37576900  | 2.85793300  |
| H                         | 2.21771800  | 2.14418600  | 2.81484800  |
| H                         | -3.11563300 | 2.12399400  | 2.86659300  |
| H                         | 2.24053800  | -3.03649400 | 3.11832900  |
| H                         | -3.09319900 | -3.05680700 | 3.17021400  |
| C                         | 1.55307000  | 1.08595400  | -3.10759500 |
| C                         | 1.47053700  | 0.37529000  | -4.45744100 |
| H                         | 2.48278400  | 0.72493600  | -2.64095700 |
| H                         | 1.65218900  | 2.16692200  | -3.26223200 |
| H                         | 1.05852400  | -0.62059700 | -4.32569200 |

|                          |             |             |             |
|--------------------------|-------------|-------------|-------------|
| C                        | 2.77876600  | 0.36207000  | -5.22245500 |
| H                        | 3.51739800  | -0.21163800 | -4.64222400 |
| H                        | 2.66593900  | -0.11241500 | -6.20189000 |
| H                        | 3.16954400  | 1.37580200  | -5.37220000 |
| N                        | 0.44263100  | 0.83509300  | -2.21340000 |
| Br                       | 0.03515600  | 1.29061400  | -5.64565800 |
| C                        | 0.45124100  | -0.39303900 | -1.53015600 |
| O                        | 1.24941800  | -1.26938700 | -1.89845100 |
| O                        | -0.42989700 | -0.50813800 | -0.57889700 |
| C                        | -0.34531600 | 1.97016300  | -1.75533700 |
| H                        | -1.18587700 | 1.59843500  | -1.16567600 |
| H                        | 0.24576100  | 2.65290800  | -1.11746200 |
| H                        | -0.72956400 | 2.53122300  | -2.61875300 |
| <b>Ti-Ts<sub>3</sub></b> |             |             |             |
| Ti                       | 0.50563861  | 1.30955089  | 14.37764581 |
| Ti                       | 0.47936479  | 1.14729964  | 11.60983884 |
| O                        | 1.92069323  | 2.69532893  | 13.94538709 |
| O                        | -0.91584847 | -0.11565457 | 14.13721367 |
| O                        | 1.93351106  | -0.10425060 | 14.10940117 |
| O                        | -0.92860208 | 2.68388042  | 13.97299925 |
| O                        | -1.01479522 | 2.59317927  | 11.72921109 |
| O                        | 1.97718969  | -0.27623613 | 11.86914527 |
| O                        | -1.00266710 | -0.28711481 | 11.89817217 |
| O                        | 1.96491266  | 2.60406923  | 11.70040432 |
| C                        | 2.36371332  | 3.06017049  | 12.81120074 |
| C                        | -1.37999744 | -0.60980289 | 13.06197842 |
| C                        | 2.37987121  | -0.59554438 | 13.02535949 |
| C                        | -1.39586767 | 3.04578494  | 12.84763107 |
| H                        | 3.14776071  | 3.82817044  | 12.80200642 |

|    |             |             |             |
|----|-------------|-------------|-------------|
| H  | -2.18559006 | 3.80797914  | 12.85375126 |
| H  | 3.17058040  | -1.35250921 | 13.10548758 |
| H  | -2.16315657 | -1.37282217 | 13.15737247 |
| C  | 0.30887835  | 1.56060331  | 5.45790662  |
| C  | -0.35404301 | 0.22235709  | 5.69293724  |
| H  | 1.37710131  | 1.38654533  | 5.22915974  |
| H  | -0.11089430 | 2.15618209  | 4.64691681  |
| H  | -1.34224973 | 0.20045857  | 6.12046448  |
| C  | 0.36570148  | -1.06111023 | 5.38211987  |
| H  | 1.04128727  | -1.29377048 | 6.21289485  |
| H  | -0.34081064 | -1.88321051 | 5.25111034  |
| H  | 0.95159938  | -0.96292828 | 4.46305839  |
| N  | 0.14881723  | 2.29253800  | 6.70528602  |
| Br | -1.64957592 | 0.31027858  | 3.46035625  |
| C  | 0.27710503  | 1.49586352  | 7.84511730  |
| O  | 0.14647972  | 0.24628383  | 7.47378101  |
| O  | 0.44709791  | 2.06410579  | 8.96438513  |
| C  | 0.51200849  | 3.69466323  | 6.72468220  |
| H  | 0.34555067  | 4.07858245  | 7.73213298  |
| H  | 1.57315848  | 3.85467392  | 6.46211081  |
| H  | -0.10787281 | 4.25298471  | 6.01171336  |

**Ti-Int<sub>5</sub>**

|    |             |             |            |
|----|-------------|-------------|------------|
| Ti | -0.42542700 | -0.37372500 | 4.37773300 |
| Ti | -0.44928800 | -0.56316800 | 1.46680000 |
| O  | 0.95712500  | 1.02047800  | 3.91753500 |
| O  | -1.82602000 | -1.80139100 | 4.11893600 |
| O  | 0.99627000  | -1.79588700 | 4.12963800 |
| O  | -1.85232300 | 1.00719100  | 3.98265900 |
| O  | -1.91741900 | 0.95378400  | 1.73058900 |

|    |             |             |             |
|----|-------------|-------------|-------------|
| O  | 1.02859200  | -1.99188200 | 1.88601800  |
| O  | -1.92539300 | -2.03228600 | 1.87717800  |
| O  | 1.04552500  | 0.96316500  | 1.66327400  |
| C  | 1.41883800  | 1.38958200  | 2.78510000  |
| C  | -2.29369100 | -2.31333900 | 3.04565200  |
| C  | 1.43519600  | -2.29164200 | 3.03854400  |
| C  | -2.30786900 | 1.37674500  | 2.85000000  |
| H  | 2.21771800  | 2.14418600  | 2.81484800  |
| H  | -3.11563300 | 2.12399400  | 2.86659300  |
| H  | 2.24053800  | -3.03649400 | 3.11832900  |
| H  | -3.09319900 | -3.05680700 | 3.17021400  |
| C  | 0.98611600  | 1.19766400  | -3.38841400 |
| C  | 1.07703300  | -0.28893300 | -3.76081800 |
| H  | 1.96872600  | 1.63086000  | -3.14601400 |
| H  | 0.53541200  | 1.76636400  | -4.20725400 |
| H  | 0.30155100  | -0.53380000 | -4.49123300 |
| C  | 2.42647700  | -0.77397100 | -4.23615200 |
| H  | 3.21325300  | -0.53603500 | -3.50956300 |
| H  | 2.41167700  | -1.85709400 | -4.40205000 |
| H  | 2.63254400  | -0.27415300 | -5.18915900 |
| N  | 0.15098500  | 1.14195800  | -2.18459500 |
| Br | 0.72966700  | 1.41765500  | -6.85672800 |
| C  | 0.11370800  | -0.10406700 | -1.68438900 |
| O  | 0.70604300  | -0.98095000 | -2.49838800 |
| O  | -0.41506900 | -0.46162200 | -0.61185500 |
| C  | -0.31917400 | 2.32269900  | -1.48889900 |
| H  | -0.96212100 | 2.02177700  | -0.65911800 |
| H  | 0.52585600  | 2.90270300  | -1.09193900 |
| H  | -0.88607800 | 2.95126800  | -2.18472100 |

**Nb-HKUST-1**

|    |             |             |             |
|----|-------------|-------------|-------------|
| O  | 1.46706200  | -1.46676300 | -1.07992900 |
| O  | -1.46692200 | 1.46756300  | -1.07894400 |
| O  | 1.46759500  | 1.46684900  | -1.07895700 |
| O  | -1.46779300 | -1.46605500 | -1.07987400 |
| O  | -1.53915300 | -1.53841400 | 1.15898900  |
| O  | 1.53935300  | 1.53760200  | 1.15990400  |
| O  | -1.53860900 | 1.53831400  | 1.15991800  |
| O  | 1.53847300  | -1.53910400 | 1.15893200  |
| C  | 1.93303900  | -1.93296800 | 0.01829700  |
| C  | -1.93298700 | 1.93302600  | 0.01959800  |
| C  | 1.93392700  | 1.93207800  | 0.01957000  |
| C  | -1.93391900 | -1.93209500 | 0.01836200  |
| H  | 2.70650100  | -2.70624400 | -0.04502000 |
| H  | -2.70776700 | -2.70498400 | -0.04494800 |
| H  | 2.70780300  | 2.70493900  | -0.04339700 |
| H  | -2.70650700 | 2.70624200  | -0.04334200 |
| Nb | 0.00001400  | -0.00053200 | 1.23077900  |
| Nb | -0.00002400 | 0.00052800  | -1.29396900 |

**Nb-Int<sub>0</sub>**

|   |             |             |             |
|---|-------------|-------------|-------------|
| O | 1.49982900  | 1.49968000  | 1.11671300  |
| O | -1.49966700 | -1.49967800 | 1.11688400  |
| O | 1.49981600  | -1.49969400 | 1.11673100  |
| O | -1.49965200 | 1.49969400  | 1.11686600  |
| O | -1.50340300 | 1.50328400  | -1.12222000 |
| O | 1.50325500  | -1.50329100 | -1.12235500 |
| O | -1.50341400 | -1.50329400 | -1.12220200 |
| O | 1.50327300  | 1.50325400  | -1.12237300 |
| C | 1.93336800  | 1.93343200  | -0.00161800 |

|                           |             |             |             |
|---------------------------|-------------|-------------|-------------|
| C                         | -1.93350100 | -1.93330700 | -0.00137300 |
| C                         | 1.93344200  | -1.93336800 | -0.00159100 |
| C                         | -1.93340600 | 1.93339200  | -0.00139900 |
| H                         | 2.70701100  | 2.70666800  | 0.00133100  |
| H                         | -2.70692000 | 2.70675700  | 0.00166200  |
| H                         | 2.70693000  | -2.70675900 | 0.00135900  |
| H                         | -2.70686500 | -2.70682200 | 0.00169000  |
| Nb                        | -0.00008200 | -0.00001600 | -1.25980800 |
| Nb                        | 0.00008600  | 0.00000700  | 1.26482100  |
| C                         | -0.18675731 | -1.14403823 | -3.94865064 |
| C                         | -1.20651823 | -0.06468662 | -4.11990677 |
| H                         | -0.39892284 | -2.00542892 | -3.31715302 |
| H                         | 0.48699325  | -1.34442271 | -4.78418750 |
| H                         | -1.17063497 | 0.45517485  | -5.08216912 |
| C                         | -2.57316325 | -0.11836989 | -3.47595317 |
| H                         | -2.95233391 | 0.89178948  | -3.27520131 |
| H                         | -3.29211739 | -0.62791306 | -4.13027552 |
| H                         | -2.52780331 | -0.65700157 | -2.52351568 |
| N                         | -0.04847615 | 0.13573408  | -3.25098959 |
| C                         | 0.99705391  | 1.02947518  | -3.73512433 |
| H                         | 0.74495820  | 2.06045224  | -3.46193211 |
| H                         | 1.94620692  | 0.76794280  | -3.25362924 |
| H                         | 1.13966724  | 0.98434039  | -4.83093223 |
| <b>Nb-Int<sub>1</sub></b> |             |             |             |
| O                         | 1.52106800  | 1.61845800  | -0.59783400 |
| O                         | -1.59533300 | -1.44743200 | -0.61317900 |
| O                         | 1.52829800  | -1.45698600 | -0.60553600 |
| O                         | -1.56850100 | 1.63053500  | -0.59347800 |
| O                         | -1.56459300 | 1.61249000  | -2.86013500 |



|    |             |             |             |
|----|-------------|-------------|-------------|
| O  | 1.50338300  | -1.46285200 | -2.87171900 |
| O  | -1.57180400 | -1.45752800 | -2.87782500 |
| O  | 1.50808800  | 1.60890300  | -2.86366000 |
| C  | 1.91748400  | 2.01849800  | -1.73216300 |
| C  | -1.98441100 | -1.85830400 | -1.74594900 |
| C  | 1.91841700  | -1.86342800 | -1.73874300 |
| C  | -1.97121800 | 2.02409900  | -1.72794800 |
| H  | 2.67694900  | 2.78409600  | -1.74341200 |
| H  | -2.73698200 | 2.78418500  | -1.74308100 |
| H  | 2.67686800  | -2.62933100 | -1.74338400 |
| H  | -2.73692700 | -2.62939400 | -1.74305300 |
| Nb | -0.03032900 | 0.07450400  | -2.82661800 |
| Nb | -0.02741200 | 0.07399300  | -0.57109400 |
| C  | -1.38680800 | -0.50074600 | 2.45098800  |
| C  | -0.15829900 | -1.30941900 | 2.63504100  |
| H  | -2.15759500 | -0.83543300 | 1.75700900  |
| H  | -1.71201700 | 0.09556500  | 3.29990200  |
| H  | 0.30203800  | -1.16212400 | 3.61373600  |
| C  | 0.05514800  | -2.66939200 | 2.01618500  |
| H  | 1.11887700  | -2.84959600 | 1.82682700  |
| H  | -0.29998100 | -3.42945000 | 2.72572300  |
| H  | -0.49068800 | -2.78888000 | 1.07666500  |
| N  | -0.12105400 | -0.07056200 | 1.79521200  |
| Br | -0.19097400 | -0.09324300 | 6.04304800  |
| C  | 0.55180600  | 1.08267100  | 2.43409700  |
| H  | 1.61487400  | 1.05376200  | 2.17919600  |
| H  | 0.12030600  | 2.00761900  | 2.03762500  |
| H  | 0.43173100  | 1.05265800  | 3.52501200  |

**Nb-Ts<sub>1</sub>**

|    |             |             |             |
|----|-------------|-------------|-------------|
| O  | 1.49982900  | 1.49968000  | 1.11671300  |
| O  | -1.49966700 | -1.49967800 | 1.11688400  |
| O  | 1.49981600  | -1.49969400 | 1.11673100  |
| O  | -1.49965200 | 1.49969400  | 1.11686600  |
| O  | -1.50340300 | 1.50328400  | -1.12222000 |
| O  | 1.50325500  | -1.50329100 | -1.12235500 |
| O  | -1.50341400 | -1.50329400 | -1.12220200 |
| O  | 1.50327300  | 1.50325400  | -1.12237300 |
| C  | 1.93336800  | 1.93343200  | -0.00161800 |
| C  | -1.93350100 | -1.93330700 | -0.00137300 |
| C  | 1.93344200  | -1.93336800 | -0.00159100 |
| C  | -1.93340600 | 1.93339200  | -0.00139900 |
| H  | 2.70701100  | 2.70666800  | 0.00133100  |
| H  | -2.70692000 | 2.70675700  | 0.00166200  |
| H  | 2.70693000  | -2.70675900 | 0.00135900  |
| H  | -2.70686500 | -2.70682200 | 0.00169000  |
| Nb | -0.00008200 | -0.00001600 | -1.25980800 |
| Nb | 0.00008600  | 0.00000700  | 1.26482100  |
| C  | -1.71221650 | 0.00287242  | 3.91970590  |
| C  | -0.72667213 | -0.76202777 | 4.71419239  |
| H  | -2.32640622 | -0.60818146 | 3.25680127  |
| H  | -2.30496262 | 0.74536929  | 4.45955476  |
| H  | -0.19631001 | -0.22905949 | 5.49106807  |
| C  | -0.20235385 | -2.10512969 | 4.28441866  |
| H  | 0.71924785  | -1.99605341 | 3.70024202  |
| H  | 0.01540742  | -2.70912639 | 5.16847768  |
| H  | -0.93731422 | -2.63508422 | 3.67168453  |
| N  | -0.49856629 | 0.49286819  | 3.29057315  |
| Br | -2.27164265 | -1.52441794 | 6.74903905  |

|                           |             |             |             |
|---------------------------|-------------|-------------|-------------|
| C                         | -0.11546028 | 1.83933635  | 3.70387368  |
| H                         | 0.92777278  | 2.02935350  | 3.43820483  |
| H                         | -0.74887022 | 2.57127716  | 3.18218471  |
| H                         | -0.24466728 | 1.97896872  | 4.78774051  |
| <b>Nb-Int<sub>2</sub></b> |             |             |             |
| O                         | 1.53759600  | 1.55265100  | -0.64882400 |
| O                         | -1.53567900 | -1.47010500 | -0.61217300 |
| O                         | 1.44607200  | -1.49690700 | -0.60914100 |
| O                         | -1.63228400 | 1.51994000  | -0.63664200 |
| O                         | -1.55482100 | 1.63469800  | -2.89932800 |
| O                         | 1.50198200  | -1.43364200 | -2.87210900 |
| O                         | -1.56038200 | -1.42774600 | -2.87573400 |
| O                         | 1.50733300  | 1.63333500  | -2.91347300 |
| C                         | 1.92056200  | 1.99881600  | -1.76591200 |
| C                         | -1.96355600 | -1.86254800 | -1.74840800 |
| C                         | 1.89113100  | -1.87341700 | -1.74272600 |
| C                         | -1.99085800 | 1.98802100  | -1.75620400 |
| H                         | 2.67694900  | 2.78409600  | -1.74341200 |
| H                         | -2.73698200 | 2.78418500  | -1.74308100 |
| H                         | 2.67686800  | -2.62933100 | -1.74338400 |
| H                         | -2.73692700 | -2.62939400 | -1.74305300 |
| Nb                        | -0.02404100 | 0.10616200  | -2.98415800 |
| Nb                        | -0.04584800 | 0.01861800  | -0.33577500 |
| C                         | -0.42463700 | 0.02014900  | 2.66497100  |
| C                         | 0.72477900  | -0.39838600 | 3.59450600  |
| H                         | -0.89405700 | -0.89186500 | 2.26440400  |
| H                         | -1.19974000 | 0.55006400  | 3.24378300  |
| H                         | 1.29031800  | 0.47090100  | 3.92917600  |
| C                         | 1.62455200  | -1.49172200 | 3.05656900  |

|                           |             |             |             |
|---------------------------|-------------|-------------|-------------|
| H                         | 2.04805400  | -1.15654900 | 2.10207300  |
| H                         | 2.44326400  | -1.71625800 | 3.74788700  |
| H                         | 1.05869500  | -2.41111500 | 2.86944800  |
| N                         | 0.09085600  | 0.84669600  | 1.58679600  |
| Br                        | -0.08001600 | -1.06635200 | 5.42307000  |
| C                         | 0.21494800  | 2.24507200  | 1.95685300  |
| H                         | 0.71376800  | 2.78831800  | 1.15149100  |
| H                         | -0.77699900 | 2.70522000  | 2.12836400  |
| H                         | 0.80665900  | 2.39513200  | 2.87813000  |
| <b>Nb-Int<sub>3</sub></b> |             |             |             |
| O                         | 1.75329500  | 1.54167500  | -0.69263600 |
| O                         | -1.36312200 | -1.44361400 | -0.67294600 |
| O                         | 1.61048000  | -1.49255100 | -0.67016200 |
| O                         | -1.44407700 | 1.54271500  | -0.70202800 |
| O                         | -1.37532100 | 1.65459000  | -2.96342800 |
| O                         | 1.68600300  | -1.41150900 | -2.93106200 |
| O                         | -1.37899900 | -1.40879300 | -2.93622100 |
| O                         | 1.68001400  | 1.65378800  | -2.95538000 |
| C                         | 2.11240300  | 2.00822200  | -1.81337200 |
| C                         | -1.78545700 | -1.84122200 | -1.80913600 |
| C                         | 2.06741700  | -1.85882400 | -1.80122700 |
| C                         | -1.80863400 | 2.00895400  | -1.81995100 |
| H                         | 2.85820300  | 2.80353500  | -1.80086000 |
| H                         | -2.55572800 | 2.80362400  | -1.80052900 |
| H                         | 2.85812200  | -2.60989200 | -1.80083200 |
| H                         | -2.55567300 | -2.60995500 | -1.80050100 |
| Nb                        | 0.15608000  | 0.12397200  | -3.04068500 |
| Nb                        | 0.13435000  | 0.03341200  | -0.39941300 |
| C                         | -0.58946400 | 0.11020100  | 2.48570900  |

|                          |             |             |             |
|--------------------------|-------------|-------------|-------------|
| C                        | 0.29093900  | -0.32886600 | 3.66298900  |
| H                        | -0.99850100 | -0.79670600 | 2.01329500  |
| H                        | -1.45178200 | 0.68756200  | 2.86032400  |
| H                        | 0.76415200  | 0.52944800  | 4.14120300  |
| C                        | 1.28471000  | -1.42849400 | 3.34722000  |
| H                        | 1.93654500  | -1.08408800 | 2.53420300  |
| H                        | 1.90276600  | -1.67783500 | 4.21544800  |
| H                        | 0.77189900  | -2.33505700 | 3.00754600  |
| N                        | 0.18856300  | 0.88148000  | 1.52761000  |
| Br                       | -0.95794800 | -1.00502500 | 5.21165300  |
| C                        | 3.95957300  | 1.47579400  | 1.32047000  |
| O                        | 3.86306600  | 2.63255900  | 1.47950600  |
| O                        | 4.12032600  | 0.32365600  | 1.19879800  |
| C                        | 0.26276100  | 2.29108000  | 1.87399000  |
| H                        | 0.69020400  | 2.46299200  | 2.87828100  |
| H                        | 0.89705100  | 2.80944800  | 1.15138900  |
| H                        | -0.73790400 | 2.76326900  | 1.85842400  |
| <b>Nb-Ts<sub>2</sub></b> |             |             |             |
| O                        | 1.49982900  | 1.49968000  | 1.11671300  |
| O                        | -1.49966700 | -1.49967800 | 1.11688400  |
| O                        | 1.49981600  | -1.49969400 | 1.11673100  |
| O                        | -1.49965200 | 1.49969400  | 1.11686600  |
| O                        | -1.50340300 | 1.50328400  | -1.12222000 |
| O                        | 1.50325500  | -1.50329100 | -1.12235500 |
| O                        | -1.50341400 | -1.50329400 | -1.12220200 |
| O                        | 1.50327300  | 1.50325400  | -1.12237300 |
| C                        | 1.93336800  | 1.93343200  | -0.00161800 |
| C                        | -1.93350100 | -1.93330700 | -0.00137300 |
| C                        | 1.93344200  | -1.93336800 | -0.00159100 |

|                           |             |             |             |
|---------------------------|-------------|-------------|-------------|
| C                         | -1.93340600 | 1.93339200  | -0.00139900 |
| H                         | 2.70701100  | 2.70666800  | 0.00133100  |
| H                         | -2.70692000 | 2.70675700  | 0.00166200  |
| H                         | 2.70693000  | -2.70675900 | 0.00135900  |
| H                         | -2.70686500 | -2.70682200 | 0.00169000  |
| Nb                        | -0.00008200 | -0.00001600 | -1.25980800 |
| Nb                        | 0.00008600  | 0.00000700  | 1.26482100  |
| C                         | -1.32864452 | -0.35460697 | 4.34138217  |
| C                         | -0.86424056 | -1.74512080 | 4.78479661  |
| H                         | -2.22444550 | -0.45797087 | 3.71050000  |
| H                         | -1.62171788 | 0.21779206  | 5.23268352  |
| H                         | -0.06858770 | -1.67897987 | 5.52533315  |
| C                         | -0.51474223 | -2.71478110 | 3.67683144  |
| H                         | 0.36768557  | -2.33236361 | 3.14878909  |
| H                         | -0.26066515 | -3.70012544 | 4.08020055  |
| H                         | -1.33200650 | -2.81390180 | 2.95695842  |
| N                         | -0.27180775 | 0.36295050  | 3.61889278  |
| Br                        | -2.41190948 | -2.54898944 | 5.91530392  |
| C                         | 1.54082881  | 0.55580775  | 4.66081284  |
| O                         | 1.60436184  | 1.25349974  | 5.62883027  |
| O                         | 1.93576500  | -0.32440250 | 3.95776574  |
| C                         | -0.63559846 | 1.78719657  | 3.62780699  |
| H                         | -0.76057918 | 2.11707479  | 4.63798528  |
| H                         | 0.14037002  | 2.35645118  | 3.16012964  |
| H                         | -1.55138620 | 1.92475940  | 3.09179460  |
| <b>Nb-Int<sub>4</sub></b> |             |             |             |
| O                         | 0.91778400  | 1.40580500  | -1.20143300 |
| O                         | -2.17946000 | -1.69729600 | -1.19294400 |
| O                         | 0.88408700  | -1.74271100 | -1.20917500 |

|    |             |             |             |
|----|-------------|-------------|-------------|
| O  | -2.17248800 | 1.39900900  | -1.19263500 |
| O  | -2.15514200 | 1.38988200  | -3.46188000 |
| O  | 0.91341200  | -1.69154500 | -3.47630600 |
| O  | -2.16294600 | -1.68610300 | -3.46249100 |
| O  | 0.91655000  | 1.38505300  | -3.46997400 |
| C  | 1.31831700  | 1.79533900  | -2.33276500 |
| C  | -2.57006100 | -2.09277100 | -2.32734600 |
| C  | 1.30468900  | -2.11269000 | -2.33862500 |
| C  | -2.56486300 | 1.79370100  | -2.32613500 |
| H  | 2.08339800  | 2.55481500  | -2.34172800 |
| H  | -3.33053300 | 2.55490400  | -2.34139700 |
| H  | 2.08331700  | -2.85861200 | -2.34170000 |
| H  | -3.33047800 | -2.85867500 | -2.34136900 |
| Nb | -0.61787700 | -0.15045800 | -3.41339400 |
| Nb | -0.60982800 | -0.15546900 | -1.15357200 |
| C  | 0.68901300  | -0.83811400 | 4.23411500  |
| C  | 1.82892700  | 0.10047400  | 4.62749900  |
| H  | 1.17117600  | -1.73726500 | 3.82709900  |
| H  | 0.13025600  | -1.13626800 | 5.12841600  |
| H  | 2.13315200  | 0.69552800  | 3.77076700  |
| C  | 3.00129400  | -0.60152500 | 5.28905400  |
| H  | 3.44256000  | -1.28681900 | 4.55657800  |
| H  | 3.76929500  | 0.11077900  | 5.60653300  |
| H  | 2.68209500  | -1.18225700 | 6.16310200  |
| N  | -0.23181600 | -0.30138400 | 3.25324100  |
| Br | 1.12287000  | 1.54984200  | 5.94276700  |
| C  | 0.21176800  | -0.32048300 | 1.91233800  |
| O  | 1.41858300  | -0.52571800 | 1.70081000  |
| O  | -0.71695700 | -0.10485900 | 1.03303200  |

|                          |             |             |             |
|--------------------------|-------------|-------------|-------------|
| C                        | -1.64437300 | -0.24492000 | 3.59019200  |
| H                        | -2.17876100 | 0.21874300  | 2.75926900  |
| H                        | -2.07493800 | -1.24966300 | 3.75970700  |
| H                        | -1.79070000 | 0.35560500  | 4.49876100  |
| <b>Nb-Ts<sub>3</sub></b> |             |             |             |
| O                        | 1.49982900  | 1.49968000  | 1.11671300  |
| O                        | -1.49966700 | -1.49967800 | 1.11688400  |
| O                        | 1.49981600  | -1.49969400 | 1.11673100  |
| O                        | -1.49965200 | 1.49969400  | 1.11686600  |
| O                        | -1.50340300 | 1.50328400  | -1.12222000 |
| O                        | 1.50325500  | -1.50329100 | -1.12235500 |
| O                        | -1.50341400 | -1.50329400 | -1.12220200 |
| O                        | 1.50327300  | 1.50325400  | -1.12237300 |
| C                        | 1.93336800  | 1.93343200  | -0.00161800 |
| C                        | -1.93350100 | -1.93330700 | -0.00137300 |
| C                        | 1.93344200  | -1.93336800 | -0.00159100 |
| C                        | -1.93340600 | 1.93339200  | -0.00139900 |
| H                        | 2.70701100  | 2.70666800  | 0.00133100  |
| H                        | -2.70692000 | 2.70675700  | 0.00166200  |
| H                        | 2.70693000  | -2.70675900 | 0.00135900  |
| H                        | -2.70686500 | -2.70682200 | 0.00169000  |
| Nb                       | -0.00008200 | -0.00001600 | -1.25980800 |
| Nb                       | 0.00008600  | 0.00000700  | 1.26482100  |
| C                        | -1.10408246 | -0.51177732 | 6.89182296  |
| C                        | -0.49405142 | -1.87350394 | 6.65064524  |
| H                        | -2.20361885 | -0.59772840 | 6.80639305  |
| H                        | -0.87972654 | -0.09478550 | 7.87383061  |
| H                        | 0.57042399  | -1.94016010 | 6.50019510  |
| C                        | -1.35379644 | -3.10172605 | 6.52840059  |



|                           |             |             |             |
|---------------------------|-------------|-------------|-------------|
| H                         | -1.77698470 | -3.13455841 | 5.51823196  |
| H                         | -0.76835803 | -4.00657223 | 6.70339592  |
| H                         | -2.17045674 | -3.07591156 | 7.25623214  |
| N                         | -0.56451642 | 0.37750210  | 5.87358270  |
| Br                        | 0.12207805  | -2.27068446 | 9.12509187  |
| C                         | -0.43429891 | -0.22035237 | 4.61754796  |
| O                         | -0.48278214 | -1.50997646 | 4.74402473  |
| O                         | -0.26644059 | 0.52526455  | 3.60736678  |
| C                         | -0.83083946 | 1.79573731  | 6.00275585  |
| H                         | -0.37516953 | 2.30993236  | 5.15544422  |
| H                         | -1.91293582 | 2.01848087  | 6.00391754  |
| H                         | -0.39927491 | 2.17456946  | 6.93788771  |
| <b>Nb-Int<sub>5</sub></b> |             |             |             |
| O                         | 0.91410100  | 1.39682100  | -1.20482900 |
| O                         | -2.16742700 | -1.69762200 | -1.20245500 |
| O                         | 0.91344200  | -1.70231800 | -1.20400500 |
| O                         | -2.16860700 | 1.39195200  | -1.20240200 |
| O                         | -2.16041800 | 1.38306100  | -3.46802300 |
| O                         | 0.91045600  | -1.68917500 | -3.46904000 |
| O                         | -2.15971800 | -1.68807300 | -3.46838800 |
| O                         | 0.91090300  | 1.38433100  | -3.46940200 |
| C                         | 1.31829200  | 1.79481300  | -2.33554400 |
| C                         | -2.56694800 | -2.09608500 | -2.33432800 |
| C                         | 1.31742800  | -2.09911500 | -2.33522400 |
| C                         | -2.56795300 | 1.79155400  | -2.33406800 |
| H                         | 2.08339800  | 2.55481500  | -2.34172800 |
| H                         | -3.33053300 | 2.55490400  | -2.34139700 |
| H                         | 2.08331700  | -2.85861200 | -2.34170000 |
| H                         | -3.33047800 | -2.85867500 | -2.34136900 |

|    |             |             |             |
|----|-------------|-------------|-------------|
| Nb | -0.62240800 | -0.15140800 | -3.42712100 |
| Nb | -0.61754300 | -0.15032200 | -1.18089200 |
| C  | 0.60125100  | -0.43297700 | 4.29868000  |
| C  | 1.80204500  | -0.06589400 | 3.41636700  |
| H  | 0.62874600  | -1.48441400 | 4.62613900  |
| H  | 0.56336600  | 0.21419800  | 5.18004500  |
| H  | 2.05552000  | 0.98774600  | 3.55840300  |
| C  | 3.02770000  | -0.93621600 | 3.56689200  |
| H  | 2.78385700  | -1.99374600 | 3.40580600  |
| H  | 3.80276100  | -0.63899700 | 2.85176400  |
| H  | 3.40763300  | -0.79150000 | 4.58461400  |
| N  | -0.51012900 | -0.22546600 | 3.36636100  |
| Br | 2.48225400  | 1.23962700  | 6.69291000  |
| C  | -0.07051900 | -0.19751300 | 2.09351000  |
| O  | 1.26232100  | -0.18807400 | 2.03593400  |
| O  | -0.79990700 | -0.18166000 | 1.08137600  |
| C  | -1.90109900 | -0.36445200 | 3.73888000  |
| H  | -2.52095400 | -0.17832600 | 2.85952100  |
| H  | -2.10516000 | -1.37748500 | 4.11526900  |
| H  | -2.14854900 | 0.35718100  | 4.52505300  |

### W-HKUST-1

|   |           |           |           |
|---|-----------|-----------|-----------|
| W | -0.003164 | 0.001110  | 1.271896  |
| W | 0.001913  | -0.001299 | -1.269200 |
| O | -1.046597 | 1.675489  | 1.148105  |
| O | 1.039738  | -1.674051 | 1.154540  |
| O | 1.675432  | 1.047696  | 1.121798  |
| O | -1.681887 | -1.044762 | 1.116716  |
| O | -1.679603 | -1.033184 | -1.155560 |
| O | 1.685622  | 1.028034  | -1.150456 |

|   |           |           |           |
|---|-----------|-----------|-----------|
| O | 1.038409  | -1.685585 | -1.117715 |
| O | -1.028820 | 1.686635  | -1.124055 |
| C | -1.330388 | 2.152200  | 0.011713  |
| C | 1.332621  | -2.150381 | 0.020279  |
| C | 2.151721  | 1.330324  | -0.014582 |
| C | -2.151795 | -1.331774 | -0.021063 |
| H | -1.910248 | 3.087124  | 0.012365  |
| H | -3.086253 | -1.912413 | -0.025184 |
| H | 3.086663  | 1.910235  | -0.015538 |
| H | 1.914795  | -3.083882 | 0.025107  |

**W-Int<sub>1</sub>**

|   |             |             |             |
|---|-------------|-------------|-------------|
| W | -0.09058100 | 0.33726400  | -0.18639500 |
| W | -2.31957700 | 0.33929100  | -0.18892400 |
| O | -0.09061100 | 1.81176500  | -1.69729100 |
| O | -0.10210500 | -1.12589600 | 1.32174600  |
| O | -0.09518700 | -1.15915100 | -1.66171500 |
| O | -0.09715500 | 1.85320900  | 1.28424800  |
| O | -2.35135300 | 1.84028100  | 1.27353000  |
| O | -2.34857400 | -1.15734600 | -1.65010300 |
| O | -2.35414400 | -1.12177500 | 1.31095800  |
| O | -2.34551900 | 1.80038100  | -1.68701800 |
| C | -1.21934300 | 2.22492400  | -2.12321600 |
| C | -1.22711100 | -1.54325800 | 1.74849900  |
| C | -1.21986200 | -1.59014500 | -2.07471200 |
| C | -1.22517800 | 2.27768100  | 1.69681800  |
| H | -1.23073000 | 2.98714700  | -2.90715300 |
| H | -1.23492700 | 3.06217500  | 2.45832700  |
| H | -1.22213800 | -2.37799200 | -2.83189900 |
| H | -1.22636500 | -2.30333600 | 2.53277300  |

|                         |             |             |             |
|-------------------------|-------------|-------------|-------------|
| C                       | 3.00147700  | -0.14596300 | 1.27764000  |
| C                       | 3.32717700  | -0.75183400 | -0.02386200 |
| H                       | 2.31565700  | -0.65619800 | 1.94767800  |
| H                       | 3.76176100  | 0.46419700  | 1.75807800  |
| H                       | 4.31292900  | -0.49415400 | -0.40542100 |
| C                       | 2.84415500  | -2.11956000 | -0.42899400 |
| H                       | 2.70838500  | -2.19120300 | -1.51545500 |
| H                       | 3.61869800  | -2.82735800 | -0.11251500 |
| H                       | 1.89798500  | -2.37853300 | 0.05553100  |
| N                       | 2.37067000  | 0.40791300  | 0.04323300  |
| Br                      | 6.21266500  | -2.08929500 | 1.37367500  |
| C                       | 2.93024500  | 1.69194200  | -0.40405100 |
| H                       | 2.76310500  | 1.80733300  | -1.48035900 |
| H                       | 2.42386100  | 2.51125400  | 0.11893000  |
| H                       | 4.00927400  | 1.75599300  | -0.20300900 |
| <b>W-Ts<sub>1</sub></b> |             |             |             |
| W                       | 1.09601200  | 0.00178600  | 0.00084200  |
| W                       | -1.09601800 | -0.00170900 | -0.00080900 |
| O                       | 1.12218400  | 1.46088200  | -1.49881800 |
| O                       | 1.12460000  | -1.45742200 | 1.50036600  |
| O                       | 1.12701300  | -1.49789800 | -1.45826800 |
| O                       | 1.11995800  | 1.50145500  | 1.46005800  |
| O                       | -1.12690600 | 1.49786200  | 1.45820600  |
| O                       | -1.11986200 | -1.50151000 | -1.45988900 |
| O                       | -1.12227100 | -1.46098600 | 1.49879800  |
| O                       | -1.12468300 | 1.45727400  | -1.50060400 |
| C                       | -0.00160400 | 1.88371200  | -1.93672200 |
| C                       | 0.00150800  | -1.88398700 | 1.93643500  |
| C                       | 0.00461000  | -1.93667900 | -1.88371900 |

|                          |             |             |             |
|--------------------------|-------------|-------------|-------------|
| C                        | -0.00448500 | 1.93659500  | 1.88385200  |
| H                        | -0.00218800 | 2.64495800  | -2.72024700 |
| H                        | -0.00638500 | 2.71998600  | 2.64523300  |
| H                        | 0.00640400  | -2.72018100 | -2.64499300 |
| H                        | 0.00217700  | -2.64552500 | 2.71967900  |
| C                        | 3.89391770  | -0.38790678 | 1.36380058  |
| C                        | 4.36606896  | -1.44258847 | 0.44101231  |
| H                        | 3.17577900  | -0.73176182 | 2.10982938  |
| H                        | 4.65677752  | 0.26353897  | 1.79717829  |
| H                        | 5.17724046  | -1.18941365 | -0.22686214 |
| C                        | 3.58638308  | -2.70386285 | 0.18418801  |
| H                        | 2.79569596  | -2.53417432 | -0.55633068 |
| H                        | 4.25765292  | -3.47929016 | -0.19263407 |
| H                        | 3.12232807  | -3.06660498 | 1.10594202  |
| N                        | 3.27001869  | 0.08644740  | 0.14104026  |
| Br                       | 6.34736255  | -2.49962267 | 1.88381324  |
| C                        | 3.94942776  | 1.22430042  | -0.47135379 |
| H                        | 3.62677026  | 1.33732805  | -1.50971546 |
| H                        | 3.68797522  | 2.13953990  | 0.07884361  |
| H                        | 5.04264867  | 1.10221022  | -0.44298906 |
| <b>W-Int<sub>2</sub></b> |             |             |             |
| W                        | -0.04563300 | 0.34255300  | -0.18499400 |
| W                        | -2.30744500 | 0.34041300  | -0.18795300 |
| O                        | -0.07914000 | 1.82285400  | -1.70468900 |
| O                        | -0.07897200 | -1.13846200 | 1.32805500  |
| O                        | -0.08245600 | -1.17683300 | -1.66482600 |
| O                        | -0.09112000 | 1.86740700  | 1.29288100  |
| O                        | -2.35207200 | 1.84451900  | 1.27630000  |
| O                        | -2.34340200 | -1.16120100 | -1.65238100 |

|                          |             |             |             |
|--------------------------|-------------|-------------|-------------|
| O                        | -2.33774000 | -1.12039200 | 1.30929600  |
| O                        | -2.33878300 | 1.80045800  | -1.68511000 |
| C                        | -1.21194800 | 2.22645600  | -2.12188300 |
| C                        | -1.21039600 | -1.54454700 | 1.74614400  |
| C                        | -1.21312600 | -1.59440200 | -2.07110600 |
| C                        | -1.22252400 | 2.28005400  | 1.69583100  |
| H                        | -1.23073000 | 2.98714700  | -2.90715300 |
| H                        | -1.23492700 | 3.06217500  | 2.45832700  |
| H                        | -1.22213800 | -2.37799200 | -2.83189900 |
| H                        | -1.22636500 | -2.30333600 | 2.53277300  |
| C                        | 2.98539400  | -0.45480100 | 0.74817100  |
| C                        | 3.78934300  | -1.41659300 | -0.13311900 |
| H                        | 2.35662000  | -1.04556900 | 1.42657000  |
| H                        | 3.68101900  | 0.13581600  | 1.37417100  |
| H                        | 4.36653000  | -0.88156000 | -0.88645700 |
| C                        | 3.01480500  | -2.58001600 | -0.71465600 |
| H                        | 2.18400500  | -2.17589900 | -1.30472400 |
| H                        | 3.64386000  | -3.20426400 | -1.35850900 |
| H                        | 2.59555400  | -3.20544400 | 0.08211700  |
| N                        | 2.17767300  | 0.38407200  | -0.10778100 |
| Br                       | 5.40249400  | -2.26130000 | 1.01371500  |
| C                        | 2.91342200  | 1.54682900  | -0.56761400 |
| H                        | 2.27733800  | 2.16682100  | -1.20838900 |
| H                        | 3.26400000  | 2.18260400  | 0.27571400  |
| H                        | 3.81830300  | 1.30055300  | -1.16076300 |
| <b>W-Int<sub>3</sub></b> |             |             |             |
| W                        | 2.41982500  | 0.05708700  | -0.36823600 |
| W                        | 0.15989000  | 0.05139600  | -0.36442300 |
| O                        | 2.44436400  | 1.51543600  | -1.87044700 |

|    |             |             |             |
|----|-------------|-------------|-------------|
| O  | 2.45359300  | -1.40406800 | 1.13071100  |
| O  | 2.46032100  | -1.44337400 | -1.83621600 |
| O  | 2.45135500  | 1.55704200  | 1.09523800  |
| O  | 0.19186600  | 1.55570500  | 1.12294900  |
| O  | 0.20018100  | -1.45788800 | -1.85889600 |
| O  | 0.19464500  | -1.42523500 | 1.14831900  |
| O  | 0.18378600  | 1.54213300  | -1.87918500 |
| C  | 1.31746700  | 1.94137300  | -2.30296700 |
| C  | 1.32652500  | -1.82860100 | 1.56725200  |
| C  | 1.33103400  | -1.87547000 | -2.25944600 |
| C  | 1.32122500  | 1.98419200  | 1.52207400  |
| H  | 1.33507400  | 2.70002200  | -3.08996200 |
| H  | 1.33087700  | 2.77505000  | 2.27551800  |
| H  | 1.34366600  | -2.66511700 | -3.01470800 |
| H  | 1.33943900  | -2.59046100 | 2.34996400  |
| C  | -2.86234600 | -0.69501000 | 0.58336600  |
| C  | -3.79345400 | 0.33622600  | 1.22744100  |
| H  | -2.22399600 | -1.12625300 | 1.36604300  |
| H  | -3.46587000 | -1.52162200 | 0.16307500  |
| H  | -4.38003100 | 0.86772500  | 0.47890300  |
| C  | -3.14715600 | 1.26646600  | 2.23299500  |
| H  | -2.30828700 | 1.77516600  | 1.74448800  |
| H  | -3.85463400 | 2.01427900  | 2.60939500  |
| H  | -2.74641700 | 0.70216800  | 3.08329200  |
| N  | -2.06648500 | -0.03247600 | -0.42701300 |
| Br | -5.37600600 | -0.68192000 | 2.26506400  |
| C  | -1.95392900 | 3.83994700  | -1.08868400 |
| O  | -2.74723800 | 3.50782300  | -1.88156700 |
| O  | -1.18182600 | 4.23046200  | -0.30165500 |

|                         |             |             |             |
|-------------------------|-------------|-------------|-------------|
| C                       | -2.74825400 | -0.00595200 | -1.70941600 |
| H                       | -3.71918900 | 0.52749000  | -1.68673300 |
| H                       | -2.12913500 | 0.50407300  | -2.45677500 |
| H                       | -2.96158000 | -1.02828300 | -2.09202600 |
| <b>W-Ts<sub>2</sub></b> |             |             |             |
| W                       | 1.09601200  | 0.00178600  | 0.00084200  |
| W                       | -1.09601800 | -0.00170900 | -0.00080900 |
| O                       | 1.12218400  | 1.46088200  | -1.49881800 |
| O                       | 1.12460000  | -1.45742200 | 1.50036600  |
| O                       | 1.12701300  | -1.49789800 | -1.45826800 |
| O                       | 1.11995800  | 1.50145500  | 1.46005800  |
| O                       | -1.12690600 | 1.49786200  | 1.45820600  |
| O                       | -1.11986200 | -1.50151000 | -1.45988900 |
| O                       | -1.12227100 | -1.46098600 | 1.49879800  |
| O                       | -1.12468300 | 1.45727400  | -1.50060400 |
| C                       | -0.00160400 | 1.88371200  | -1.93672200 |
| C                       | 0.00150800  | -1.88398700 | 1.93643500  |
| C                       | 0.00461000  | -1.93667900 | -1.88371900 |
| C                       | -0.00448500 | 1.93659500  | 1.88385200  |
| H                       | -0.00218800 | 2.64495800  | -2.72024700 |
| H                       | -0.00638500 | 2.71998600  | 2.64523300  |
| H                       | 0.00640400  | -2.72018100 | -2.64499300 |
| H                       | 0.00217700  | -2.64552500 | 2.71967900  |
| C                       | -3.97826841 | -1.16794857 | 0.62276232  |
| C                       | -4.35523510 | -0.51954058 | 1.95815713  |
| H                       | -3.35804926 | -2.05632542 | 0.81581815  |
| H                       | -4.89746728 | -1.51298863 | 0.12882756  |
| H                       | -5.08503705 | 0.27665735  | 1.81926707  |
| C                       | -3.20196097 | -0.07218401 | 2.82982673  |



|    |             |             |             |
|----|-------------|-------------|-------------|
| H  | -2.67639634 | 0.74238605  | 2.31600952  |
| H  | -3.55935699 | 0.31482181  | 3.78933693  |
| H  | -2.49175977 | -0.88513530 | 3.00500499  |
| N  | -3.26976618 | -0.22762106 | -0.25336118 |
| Br | -5.47558290 | -1.92674222 | 2.99937516  |
| C  | -4.27325516 | 1.57337401  | -0.56260504 |
| O  | -4.82620668 | 1.35422582  | -1.59898672 |
| O  | -4.01918392 | 2.25728829  | 0.38223831  |
| C  | -3.34447454 | -0.77095036 | -1.61722039 |
| H  | -4.36952138 | -0.91565967 | -1.88784593 |
| H  | -2.88878837 | -0.08462965 | -2.30001905 |
| H  | -2.82949337 | -1.70804620 | -1.65653680 |

**W-Int<sub>4</sub>**

|   |             |             |             |
|---|-------------|-------------|-------------|
| W | -0.65120500 | 0.43649900  | 0.10216400  |
| W | -2.88870800 | 0.44056700  | 0.09775600  |
| O | -0.66633600 | 1.91818100  | -1.41549700 |
| O | -0.67670600 | -1.01743800 | 1.62285400  |
| O | -0.66973100 | -1.06615000 | -1.37591400 |
| O | -0.67004600 | 1.95739000  | 1.57702700  |
| O | -2.92855300 | 1.94325400  | 1.55990900  |
| O | -2.92688700 | -1.05868100 | -1.36535500 |
| O | -2.93302300 | -1.02065600 | 1.59816000  |
| O | -2.92463700 | 1.90307700  | -1.40367600 |
| C | -1.79414900 | 2.32644200  | -1.83687100 |
| C | -1.80010100 | -1.43518000 | 2.03805400  |
| C | -1.79393500 | -1.49001500 | -1.78608600 |
| C | -1.79903600 | 2.37822400  | 1.98330800  |
| H | -1.80891900 | 3.08953300  | -2.62144200 |
| H | -1.81311600 | 3.16456100  | 2.74403800  |

|                         |             |             |             |
|-------------------------|-------------|-------------|-------------|
| H                       | -1.80032700 | -2.27560600 | -2.54618800 |
| H                       | -1.80455400 | -2.20095000 | 2.81848400  |
| C                       | 4.87953600  | -0.65576300 | 0.88852000  |
| C                       | 5.35064200  | -1.78755700 | -0.02163700 |
| H                       | 4.49580600  | -1.15125900 | 1.79447900  |
| H                       | 5.73343000  | -0.03507600 | 1.18188000  |
| H                       | 4.51914000  | -2.16102900 | -0.61450400 |
| C                       | 6.08311600  | -2.89830900 | 0.70706000  |
| H                       | 5.37881700  | -3.37602400 | 1.40125600  |
| H                       | 6.45738100  | -3.65841900 | 0.01141100  |
| H                       | 6.93378600  | -2.50887700 | 1.28294500  |
| N                       | 3.84659800  | 0.18727300  | 0.32532000  |
| Br                      | 6.62573200  | -1.02988700 | -1.48229700 |
| C                       | 2.53065700  | -0.34149600 | 0.33156400  |
| O                       | 2.40505000  | -1.55813200 | 0.56692600  |
| O                       | 1.59910900  | 0.51295200  | 0.07347600  |
| C                       | 4.08841100  | 1.61738100  | 0.24775100  |
| H                       | 3.23028300  | 2.08364400  | -0.23699600 |
| H                       | 4.21123800  | 2.07755700  | 1.24562600  |
| H                       | 4.99260800  | 1.81818300  | -0.34129900 |
| <b>W-Ts<sub>3</sub></b> |             |             |             |
| W                       | 1.09601200  | 0.00178600  | 0.00084200  |
| W                       | -1.09601800 | -0.00170900 | -0.00080900 |
| O                       | 1.12218400  | 1.46088200  | -1.49881800 |
| O                       | 1.12460000  | -1.45742200 | 1.50036600  |
| O                       | 1.12701300  | -1.49789800 | -1.45826800 |
| O                       | 1.11995800  | 1.50145500  | 1.46005800  |
| O                       | -1.12690600 | 1.49786200  | 1.45820600  |
| O                       | -1.11986200 | -1.50151000 | -1.45988900 |

|    |             |             |             |
|----|-------------|-------------|-------------|
| O  | -1.12227100 | -1.46098600 | 1.49879800  |
| O  | -1.12468300 | 1.45727400  | -1.50060400 |
| C  | -0.00160400 | 1.88371200  | -1.93672200 |
| C  | 0.00150800  | -1.88398700 | 1.93643500  |
| C  | 0.00461000  | -1.93667900 | -1.88371900 |
| C  | -0.00448500 | 1.93659500  | 1.88385200  |
| H  | -0.00218800 | 2.64495800  | -2.72024700 |
| H  | -0.00638500 | 2.71998600  | 2.64523300  |
| H  | 0.00640400  | -2.72018100 | -2.64499300 |
| H  | 0.00217700  | -2.64552500 | 2.71967900  |
| C  | 6.61511915  | -0.93449286 | -1.05746696 |
| C  | 6.12988830  | -2.10024224 | -1.89733047 |
| H  | 6.92041448  | -1.31452748 | -0.06444629 |
| H  | 7.48869923  | -0.47318055 | -1.51863551 |
| H  | 5.59595609  | -1.87798120 | -2.80580613 |
| C  | 6.21087972  | -3.51472460 | -1.39274354 |
| H  | 5.43419444  | -3.66073856 | -0.63368234 |
| H  | 6.05955101  | -4.22841889 | -2.20509312 |
| H  | 7.18952211  | -3.70936762 | -0.94334037 |
| N  | 5.56633964  | 0.06722782  | -0.93948165 |
| Br | 8.15128411  | -2.30491518 | -3.49189043 |
| C  | 4.29370209  | -0.47200020 | -0.73950631 |
| O  | 4.20482053  | -1.71014589 | -1.01176774 |
| O  | 3.36864714  | 0.29382330  | -0.33658563 |
| C  | 5.92205811  | 1.36798251  | -0.41057629 |
| H  | 5.02161143  | 1.98289463  | -0.37684025 |
| H  | 6.33815798  | 1.30371886  | 0.61085287  |
| H  | 6.66871403  | 1.84515251  | -1.05796642 |

**W-Int<sub>5</sub>**

|    |             |             |             |
|----|-------------|-------------|-------------|
| W  | -0.67447000 | 0.44302700  | 0.09866800  |
| W  | -2.89455000 | 0.44146700  | 0.09759600  |
| O  | -0.67550100 | 1.91595600  | -1.40869200 |
| O  | -0.67442500 | -1.02098900 | 1.60925600  |
| O  | -0.67340900 | -1.05854600 | -1.37124100 |
| O  | -0.67719800 | 1.95452100  | 1.57004900  |
| O  | -2.93175000 | 1.94244600  | 1.55986300  |
| O  | -2.92634600 | -1.05701200 | -1.36306200 |
| O  | -2.92798400 | -1.01879200 | 1.59777600  |
| O  | -2.92966800 | 1.90382500  | -1.40221200 |
| C  | -1.80156300 | 2.32827600  | -1.83652900 |
| C  | -1.79895000 | -1.43894900 | 2.03471700  |
| C  | -1.79646700 | -1.48981700 | -1.78638900 |
| C  | -1.80428100 | 2.37921100  | 1.98308000  |
| H  | -1.80891900 | 3.08953300  | -2.62144200 |
| H  | -1.81311600 | 3.16456100  | 2.74403800  |
| H  | -1.80032700 | -2.27560600 | -2.54618800 |
| H  | -1.80455400 | -2.20095000 | 2.81848400  |
| C  | 4.95597700  | -0.79152400 | 0.16083100  |
| C  | 4.06647100  | -1.99012500 | -0.19597200 |
| H  | 5.33103900  | -0.84362900 | 1.19533000  |
| H  | 5.80726300  | -0.72986700 | -0.52361300 |
| H  | 4.15724000  | -2.20993800 | -1.26315400 |
| C  | 4.27887600  | -3.24081700 | 0.62513100  |
| H  | 4.17586000  | -3.03128600 | 1.69774000  |
| H  | 3.55628200  | -4.01529800 | 0.34474400  |
| H  | 5.29038900  | -3.60355600 | 0.41190200  |
| N  | 4.00612000  | 0.31434600  | 0.02293300  |
| Br | 7.31484300  | -2.62973700 | -1.64045500 |

|   |            |             |             |
|---|------------|-------------|-------------|
| C | 2.73176600 | -0.13384900 | 0.05405300  |
| O | 2.69231600 | -1.47230600 | 0.01404200  |
| O | 1.71345300 | 0.57592000  | 0.11207700  |
| C | 4.37254100 | 1.70261500  | 0.19223400  |
| H | 3.48214600 | 2.31949800  | 0.05482900  |
| H | 4.78259100 | 1.88167700  | 1.19758500  |
| H | 5.13126500 | 1.97994200  | -0.54825700 |

**Sc-HKUST-1**

|    |             |             |             |
|----|-------------|-------------|-------------|
| Sc | -0.00151300 | -0.00016500 | 1.44400300  |
| Sc | 0.00127500  | 0.00006100  | -1.44360700 |
| O  | -1.49284800 | 1.48320100  | 1.13179200  |
| O  | 1.48927300  | -1.48426100 | 1.13390100  |
| O  | 1.47925000  | 1.48851200  | 1.11975200  |
| O  | -1.48260300 | -1.48826800 | 1.11717200  |
| O  | -1.49180800 | -1.48201300 | -1.13438300 |
| O  | 1.49507600  | 1.48129700  | -1.13175300 |
| O  | 1.48097400  | -1.48979200 | -1.11765400 |
| O  | -1.47709000 | 1.49139100  | -1.11971600 |
| C  | -1.89263500 | 1.89465700  | 0.00480500  |
| C  | 1.89295700  | -1.89421700 | 0.00769000  |
| C  | 1.89464200  | 1.89245200  | -0.00459900 |
| C  | -1.89463500 | -1.89273900 | -0.00812500 |
| H  | -2.67200800 | 2.67144400  | 0.00195300  |
| H  | -2.67121200 | -2.67232300 | -0.00689600 |
| H  | 2.67138900  | 2.67186500  | -0.00138900 |
| H  | 2.67307100  | -2.67026500 | 0.00651000  |

**Sc-Int<sub>0</sub>**

|    |             |             |             |
|----|-------------|-------------|-------------|
| Sc | -0.00000500 | 0.00021800  | 1.44377700  |
| Sc | -0.00000500 | -0.00017300 | -1.44390400 |

|   |             |             |             |
|---|-------------|-------------|-------------|
| O | -1.49911500 | -1.49387200 | 1.12624000  |
| O | 1.49892700  | 1.49449900  | 1.12589000  |
| O | -1.49413400 | 1.49931000  | 1.12595100  |
| O | 1.49422800  | -1.49875700 | 1.12635600  |
| O | 1.49367300  | -1.49966100 | -1.12579200 |
| O | -1.49386100 | 1.49907900  | -1.12620200 |
| O | 1.49955800  | 1.49339700  | -1.12626100 |
| O | -1.49922600 | -1.49410900 | -1.12591000 |
| C | -1.90820300 | -1.90109100 | 0.00022300  |
| C | 1.90813300  | 1.90119000  | -0.00025800 |
| C | -1.90125400 | 1.90806900  | -0.00020800 |
| C | 1.90122400  | -1.90806900 | 0.00032900  |
| H | -2.68735300 | -2.67771600 | 0.00034300  |
| H | 2.67745500  | -2.68761300 | 0.00046300  |
| H | -2.67760600 | 2.68749200  | -0.00038800 |
| H | 2.68790900  | 2.67718700  | -0.00043200 |
| C | -1.12323911 | 0.19212315  | -4.35364342 |
| C | 0.09476997  | 1.01303475  | -4.63076959 |
| H | -1.94460731 | 0.60668923  | -3.77116027 |
| H | -1.41986310 | -0.54627983 | -5.10130033 |
| H | 0.60465072  | 0.77902774  | -5.57031988 |
| C | 0.24239592  | 2.44379974  | -4.16558698 |
| H | 1.29719508  | 2.69390487  | -3.99429829 |
| H | -0.15497638 | 3.13993135  | -4.91536233 |
| H | -0.29801159 | 2.59959291  | -3.22590247 |
| N | 0.12147414  | -0.04129886 | -3.61888298 |
| C | 0.85188979  | -1.25930141 | -3.94942114 |
| H | 1.90848047  | -1.12764519 | -3.68983936 |
| H | 0.45285982  | -2.09074052 | -3.35729596 |

|                           |             |             |             |
|---------------------------|-------------|-------------|-------------|
| H                         | 0.78735136  | -1.53256707 | -5.01915537 |
| <b>Sc-Int<sub>1</sub></b> |             |             |             |
| Sc                        | 0.06546300  | 0.27526300  | -0.65854200 |
| Sc                        | 0.00211400  | 0.27348700  | -3.63836500 |
| O                         | -1.49648200 | -1.20673600 | -1.04602300 |
| O                         | 1.60695500  | 1.70135300  | -1.04133100 |
| O                         | -1.38061000 | 1.87017400  | -1.05008100 |
| O                         | 1.50830300  | -1.24599200 | -1.04825300 |
| O                         | 1.57777700  | -1.18813400 | -3.30486800 |
| O                         | -1.53577200 | 1.73070800  | -3.30286600 |
| O                         | 1.48349000  | 1.82050000  | -3.29416000 |
| O                         | -1.43743500 | -1.28793500 | -3.30562200 |
| C                         | -1.87191300 | -1.63913700 | -2.17236400 |
| C                         | 1.94164600  | 2.16522700  | -2.17161500 |
| C                         | -1.86235400 | 2.19266500  | -2.17138100 |
| C                         | 1.93756100  | -1.62439500 | -2.17816500 |
| H                         | -2.66235400 | -2.40572700 | -2.16696500 |
| H                         | 2.70245400  | -2.41562400 | -2.16684500 |
| H                         | -2.65260700 | 2.95948100  | -2.16769600 |
| H                         | 2.71290800  | 2.94917600  | -2.16774000 |
| C                         | -1.87093600 | -0.16989800 | 2.09220600  |
| C                         | -0.57799100 | -0.73617600 | 2.54181900  |
| H                         | -2.45825900 | -0.67780300 | 1.33136300  |
| H                         | -2.43083800 | 0.43262200  | 2.80495400  |
| H                         | -0.28997200 | -0.47389700 | 3.56561800  |
| C                         | -0.04909800 | -2.06183200 | 2.05111500  |
| H                         | 1.04709400  | -2.05458300 | 2.00652700  |
| H                         | -0.34235800 | -2.83786500 | 2.76662000  |
| H                         | -0.43898700 | -2.33577700 | 1.06443700  |

|                          |             |             |             |
|--------------------------|-------------|-------------|-------------|
| N                        | -0.60434900 | 0.42415500  | 1.59227400  |
| Br                       | -0.24090600 | -0.09029000 | 6.04521500  |
| C                        | -0.24347400 | 1.72589500  | 2.19636000  |
| H                        | 0.83114300  | 1.89744400  | 2.06295100  |
| H                        | -0.79770000 | 2.52068600  | 1.68472500  |
| H                        | -0.45935800 | 1.74272300  | 3.27163700  |
| <b>Sc-Ts<sub>1</sub></b> |             |             |             |
| Sc                       | -0.00000500 | 0.00021800  | 1.44377700  |
| Sc                       | -0.00000500 | -0.00017300 | -1.44390400 |
| O                        | -1.49911500 | -1.49387200 | 1.12624000  |
| O                        | 1.49892700  | 1.49449900  | 1.12589000  |
| O                        | -1.49413400 | 1.49931000  | 1.12595100  |
| O                        | 1.49422800  | -1.49875700 | 1.12635600  |
| O                        | 1.49367300  | -1.49966100 | -1.12579200 |
| O                        | -1.49386100 | 1.49907900  | -1.12620200 |
| O                        | 1.49955800  | 1.49339700  | -1.12626100 |
| O                        | -1.49922600 | -1.49410900 | -1.12591000 |
| C                        | -1.90820300 | -1.90109100 | 0.00022300  |
| C                        | 1.90813300  | 1.90119000  | -0.00025800 |
| C                        | -1.90125400 | 1.90806900  | -0.00020800 |
| C                        | 1.90122400  | -1.90806900 | 0.00032900  |
| H                        | -2.68735300 | -2.67771600 | 0.00034300  |
| H                        | 2.67745500  | -2.68761300 | 0.00046300  |
| H                        | -2.67760600 | 2.68749200  | -0.00038800 |
| H                        | 2.68790900  | 2.67718700  | -0.00043200 |
| C                        | -0.88455211 | -0.16376472 | 4.45573466  |
| C                        | 0.32114590  | -0.80109841 | 5.02750081  |
| H                        | -1.53965393 | -0.84691036 | 3.91289757  |
| H                        | -1.44377468 | 0.50751455  | 5.11209369  |



|                           |             |             |             |
|---------------------------|-------------|-------------|-------------|
| H                         | 0.93173303  | -0.20217811 | 5.68828127  |
| C                         | 0.88213754  | -2.09418778 | 4.50034798  |
| H                         | 1.50286636  | -1.92150331 | 3.61309150  |
| H                         | 1.49639068  | -2.56786323 | 5.26989996  |
| H                         | 0.07715600  | -2.78304563 | 4.22824699  |
| N                         | 0.12102381  | 0.45956318  | 3.61330717  |
| Br                        | -0.66078813 | -1.71729395 | 7.33421089  |
| C                         | 0.42240476  | 1.84274999  | 3.97009340  |
| H                         | 1.36870329  | 2.14797841  | 3.51574465  |
| H                         | -0.37611710 | 2.49574554  | 3.58970206  |
| H                         | 0.48625279  | 1.97141530  | 5.06106141  |
| <b>Sc-Int<sub>2</sub></b> |             |             |             |
| Sc                        | -0.00033900 | 0.25365600  | -0.60166100 |
| Sc                        | 0.03971300  | 0.28931300  | -3.68638300 |
| O                         | -1.45888900 | -1.28078800 | -1.00916400 |
| O                         | 1.48550000  | 1.81577800  | -1.05093800 |
| O                         | -1.57759100 | 1.69143100  | -1.04204600 |
| O                         | 1.51717900  | -1.26270400 | -1.02893200 |
| O                         | 1.49056900  | -1.27151800 | -3.29410900 |
| O                         | -1.41752100 | 1.84116900  | -3.29671100 |
| O                         | 1.58904300  | 1.74116800  | -3.31384200 |
| O                         | -1.51726000 | -1.17458200 | -3.26886700 |
| C                         | -1.88387700 | -1.62516600 | -2.15194500 |
| C                         | 1.93101700  | 2.17158800  | -2.17729500 |
| C                         | -1.88532400 | 2.16762500  | -2.17026900 |
| C                         | 1.90610800  | -1.65315600 | -2.16573400 |
| H                         | -2.66235400 | -2.40572700 | -2.16696500 |
| H                         | 2.70245400  | -2.41562400 | -2.16684500 |
| H                         | -2.65260700 | 2.95948100  | -2.16769600 |

|    |             |             |             |
|----|-------------|-------------|-------------|
| H  | 2.71290800  | 2.94917600  | -2.16774000 |
| C  | -0.56259600 | -0.25590300 | 2.37014500  |
| C  | 0.27654000  | -1.32866900 | 3.08528400  |
| H  | -1.37181800 | -0.76740800 | 1.82555100  |
| H  | -1.04574700 | 0.38960700  | 3.12563500  |
| H  | 1.12885400  | -0.88266500 | 3.59663300  |
| C  | 0.68111700  | -2.51279600 | 2.23149400  |
| H  | 1.26656900  | -2.14535200 | 1.37976200  |
| H  | 1.28914300  | -3.22760700 | 2.79563700  |
| H  | -0.20049800 | -3.03265400 | 1.83819200  |
| N  | 0.25737700  | 0.51646400  | 1.45746900  |
| Br | -0.81323000 | -2.06508100 | 4.73190200  |
| C  | 1.02958900  | 1.54602700  | 2.13215500  |
| H  | 1.55088700  | 2.15861300  | 1.38967700  |
| H  | 0.38142200  | 2.21647900  | 2.73340300  |
| H  | 1.80062500  | 1.15165400  | 2.82366500  |

**Sc-Int<sub>3</sub>**

|    |            |             |             |
|----|------------|-------------|-------------|
| Sc | 3.59043000 | -0.93353500 | 0.71238600  |
| Sc | 0.86981200 | 0.47907000  | 0.42192400  |
| O  | 3.50379400 | -0.76914600 | -1.43645300 |
| O  | 2.99158200 | -0.71892800 | 2.78394100  |
| O  | 2.31633300 | -2.66485000 | 0.60495400  |
| O  | 4.18335300 | 1.16217100  | 0.77415400  |
| O  | 2.17169800 | 2.18461300  | 0.61716900  |
| O  | 0.30686500 | -1.65068500 | 0.35280400  |
| O  | 0.98180300 | 0.31151800  | 2.59749900  |
| O  | 1.54006600 | 0.34058600  | -1.65722000 |
| C  | 2.57801000 | -0.22178000 | -2.10020200 |
| C  | 1.92994500 | -0.21951600 | 3.24554900  |

|                          |             |             |             |
|--------------------------|-------------|-------------|-------------|
| C                        | 1.06382800  | -2.65559300 | 0.44465500  |
| C                        | 3.43338700  | 2.17147100  | 0.71989400  |
| H                        | 2.68535500  | -0.23743500 | -3.19592700 |
| H                        | 3.92606300  | 3.15539100  | 0.77026000  |
| H                        | 0.57646200  | -3.64111900 | 0.37521500  |
| H                        | 1.81734800  | -0.24751500 | 4.34163800  |
| C                        | -1.94489100 | 0.33279800  | -1.00577300 |
| C                        | -3.28957700 | 0.03695400  | -0.32888700 |
| H                        | -1.48187800 | -0.62373100 | -1.27936300 |
| H                        | -2.12911400 | 0.88917800  | -1.94282200 |
| H                        | -3.80222200 | 0.95323900  | -0.03268500 |
| C                        | -3.24057700 | -0.97456100 | 0.79616100  |
| H                        | -2.55937700 | -0.59147300 | 1.56487600  |
| H                        | -4.22759100 | -1.13199800 | 1.24262700  |
| H                        | -2.84522300 | -1.93328300 | 0.44471100  |
| N                        | -1.06411200 | 1.07031000  | -0.12003500 |
| Br                       | -4.62787000 | -0.68930200 | -1.79248400 |
| C                        | -1.89498300 | 2.48223600  | 3.45880100  |
| O                        | -2.77638500 | 1.71188600  | 3.46405200  |
| O                        | -1.03560000 | 3.27605700  | 3.47706300  |
| C                        | -1.35504700 | 2.49375400  | -0.08837300 |
| H                        | -2.31497300 | 2.75047900  | 0.40040800  |
| H                        | -0.57253500 | 3.03249300  | 0.46504000  |
| H                        | -1.39603500 | 2.93703200  | -1.10390800 |
| <b>Sc-Ts<sub>2</sub></b> |             |             |             |
| Sc                       | 3.49012100  | -1.00487100 | 0.16335900  |
| Sc                       | 0.78963800  | 0.38807300  | -0.10789100 |
| O                        | 3.42935400  | -0.84366700 | -1.98679500 |
| O                        | 2.93404300  | -0.83600800 | 2.25663800  |

|    |             |             |             |
|----|-------------|-------------|-------------|
| O  | 2.23612900  | -2.74873300 | 0.01612700  |
| O  | 4.09800300  | 1.07637100  | 0.24833700  |
| O  | 2.09227700  | 2.09660400  | 0.01211600  |
| O  | 0.22230900  | -1.73189400 | -0.17621300 |
| O  | 0.92259000  | 0.17160600  | 2.02636600  |
| O  | 1.43024400  | 0.19821700  | -2.19958100 |
| C  | 2.48665800  | -0.32454600 | -2.64888600 |
| C  | 1.86582700  | -0.33412900 | 2.69930400  |
| C  | 0.97992300  | -2.73993900 | -0.11358200 |
| C  | 3.34900100  | 2.08626200  | 0.16141000  |
| H  | 2.59927100  | -0.32247400 | -3.74572600 |
| H  | 3.83997900  | 3.07035200  | 0.22046100  |
| H  | 0.49037800  | -3.72615800 | -0.17458400 |
| H  | 1.73126400  | -0.33255400 | 3.79183900  |
| C  | -2.36403300 | 0.15651300  | -0.95116700 |
| C  | -3.14072800 | -0.04354300 | 0.35384500  |
| H  | -2.06951000 | -0.83032800 | -1.34765300 |
| H  | -3.06759600 | 0.59464400  | -1.67599700 |
| H  | -3.61234200 | 0.88844900  | 0.66776600  |
| C  | -2.41919500 | -0.72786400 | 1.49413000  |
| H  | -1.58509300 | -0.09450200 | 1.81912900  |
| H  | -3.08470300 | -0.87404100 | 2.35129500  |
| H  | -2.01114400 | -1.69261700 | 1.18113400  |
| N  | -1.21155800 | 1.04492700  | -0.76909100 |
| Br | -4.82985600 | -1.19065500 | -0.11294600 |
| C  | -1.78583700 | 2.88755400  | 0.66441000  |
| O  | -2.58658800 | 3.41704300  | -0.02918900 |
| O  | -1.08592800 | 2.67182400  | 1.59384300  |
| C  | -1.01443000 | 1.82562000  | -1.99761800 |

|                           |             |             |             |
|---------------------------|-------------|-------------|-------------|
| H                         | -1.90110900 | 2.43776900  | -2.22765400 |
| H                         | -0.16658100 | 2.51505200  | -1.88064400 |
| H                         | -0.79448800 | 1.19113700  | -2.87172800 |
| <b>Sc-Int<sub>4</sub></b> |             |             |             |
| Sc                        | 1.60442200  | -0.23904200 | 0.14959900  |
| Sc                        | 4.60674900  | 0.27933000  | 0.30113600  |
| O                         | 2.37615100  | -2.24201900 | 0.32660800  |
| O                         | 1.66059600  | 1.93663900  | 0.03797100  |
| O                         | 2.16316500  | -0.26679600 | -1.95500200 |
| O                         | 1.86437700  | -0.03333300 | 2.28196600  |
| O                         | 4.09466400  | 0.33178300  | 2.41300800  |
| O                         | 4.39427000  | 0.10793500  | -1.84297300 |
| O                         | 3.88757300  | 2.31971000  | 0.15421700  |
| O                         | 4.60738800  | -1.88626700 | 0.42422600  |
| C                         | 3.57875700  | -2.61704800 | 0.40824600  |
| C                         | 2.68249100  | 2.67888100  | 0.05653200  |
| C                         | 3.31165200  | -0.11338200 | -2.45545700 |
| C                         | 2.94385900  | 0.17927400  | 2.90586900  |
| H                         | 3.74322400  | -3.70474500 | 0.47303500  |
| H                         | 2.86810000  | 0.23790200  | 4.00445900  |
| H                         | 3.37275200  | -0.17963000 | -3.55460300 |
| H                         | 2.49770200  | 3.76329700  | -0.02239900 |
| C                         | -3.63327200 | -0.46722100 | -1.68618000 |
| C                         | -4.72095500 | -1.00841300 | -0.76004800 |
| H                         | -3.35930900 | -1.30658400 | -2.34221000 |
| H                         | -4.04252300 | 0.33215500  | -2.31409500 |
| H                         | -4.26941500 | -1.56199000 | 0.06091900  |
| C                         | -5.78479100 | -1.81735100 | -1.47929700 |
| H                         | -5.30833400 | -2.70727000 | -1.91435300 |

|                          |             |             |             |
|--------------------------|-------------|-------------|-------------|
| H                        | -6.56969800 | -2.14942100 | -0.79371300 |
| H                        | -6.25069800 | -1.24232900 | -2.28859800 |
| N                        | -2.44241500 | 0.01755200  | -1.01805900 |
| Br                       | -5.65255200 | 0.56136700  | 0.22322800  |
| C                        | -1.53147000 | -0.95019200 | -0.57561500 |
| O                        | -1.86365300 | -2.14407000 | -0.60854200 |
| O                        | -0.38981300 | -0.49087700 | -0.14415700 |
| C                        | -2.10330700 | 1.42806200  | -1.13614400 |
| H                        | -1.21736800 | 1.63326100  | -0.53689200 |
| H                        | -1.88537200 | 1.70827500  | -2.18020200 |
| H                        | -2.93268400 | 2.04682400  | -0.77308500 |
| <b>Sc-Ts<sub>3</sub></b> |             |             |             |
| Sc                       | 1.58302100  | -0.26505800 | 0.00272000  |
| Sc                       | 4.54320900  | 0.26153800  | 0.16265700  |
| O                        | 2.32576600  | -2.27361900 | 0.12030900  |
| O                        | 1.62196400  | 1.91425700  | -0.11076800 |
| O                        | 2.10731800  | -0.29072300 | -2.09646400 |
| O                        | 1.84531400  | -0.10180500 | 2.13730100  |
| O                        | 4.05970600  | 0.34421000  | 2.27430700  |
| O                        | 4.33985000  | 0.05584400  | -1.97962800 |
| O                        | 3.85066000  | 2.30093200  | -0.01891400 |
| O                        | 4.54876100  | -1.90265400 | 0.31020500  |
| C                        | 3.52857400  | -2.64159400 | 0.25531800  |
| C                        | 2.64251000  | 2.65900600  | -0.09725400 |
| C                        | 3.25901000  | -0.14560600 | -2.59716500 |
| C                        | 2.91154200  | 0.15369400  | 2.76663000  |
| H                        | 3.69768200  | -3.72568400 | 0.33417100  |
| H                        | 2.82255800  | 0.21696300  | 3.86559500  |
| H                        | 3.32721000  | -0.20056900 | -3.69346700 |

|    |             |             |             |
|----|-------------|-------------|-------------|
| H  | 2.45216000  | 3.74235800  | -0.16126300 |
| C  | -3.88764000 | 0.53976400  | -0.78704900 |
| C  | -4.40919600 | -0.71273600 | -0.10593300 |
| H  | -4.01786700 | 0.44103900  | -1.87924500 |
| H  | -4.46030500 | 1.40855700  | -0.46237900 |
| H  | -4.33013400 | -0.77537500 | 0.96645200  |
| C  | -4.98559100 | -1.85539100 | -0.89859200 |
| H  | -4.17044400 | -2.39746600 | -1.39179400 |
| H  | -5.53037200 | -2.54330500 | -0.25008500 |
| H  | -5.67833800 | -1.48393200 | -1.65970200 |
| N  | -2.48308400 | 0.75322900  | -0.45103100 |
| Br | -6.76539600 | 0.26963500  | 0.53316500  |
| C  | -1.76714400 | -0.39795100 | -0.22323800 |
| O  | -2.45800700 | -1.45259100 | -0.09600200 |
| O  | -0.49047300 | -0.34730800 | -0.13713000 |
| C  | -1.86945300 | 2.01365500  | -0.82901700 |
| H  | -0.83856000 | 2.03843500  | -0.47431900 |
| H  | -1.87012500 | 2.15104000  | -1.92206100 |
| H  | -2.42638600 | 2.84260800  | -0.37632100 |

**Sc-Int<sub>5</sub>**

|    |            |             |             |
|----|------------|-------------|-------------|
| Sc | 1.64721800 | -0.24620800 | 0.15190600  |
| Sc | 4.57660200 | 0.28544700  | 0.30125600  |
| O  | 2.36992700 | -2.24733800 | 0.31451200  |
| O  | 1.66628700 | 1.93562700  | 0.04128400  |
| O  | 2.16782900 | -0.29846600 | -1.94916200 |
| O  | 1.87872700 | -0.06719500 | 2.27741500  |
| O  | 4.09928400 | 0.33388600  | 2.41490700  |
| O  | 4.39084900 | 0.10611900  | -1.84066200 |
| O  | 3.89111600 | 2.32370200  | 0.15252600  |

|                   |             |             |             |
|-------------------|-------------|-------------|-------------|
| O                 | 4.59553600  | -1.88085600 | 0.42949200  |
| C                 | 3.57544000  | -2.62050800 | 0.40651700  |
| C                 | 2.68501400  | 2.68240400  | 0.05687000  |
| C                 | 3.31211200  | -0.12427200 | -2.45652600 |
| C                 | 2.95022700  | 0.16920100  | 2.90884400  |
| H                 | 3.74322400  | -3.70474500 | 0.47303500  |
| H                 | 2.86810000  | 0.23790200  | 4.00445900  |
| H                 | 3.37275200  | -0.17963000 | -3.55460300 |
| H                 | 2.49770200  | 3.76329700  | -0.02239900 |
| C                 | -3.78353300 | 0.65602900  | -1.02842300 |
| C                 | -3.87805800 | -0.85184900 | -0.74915200 |
| H                 | -3.88873700 | 0.89508600  | -2.09761700 |
| H                 | -4.55237400 | 1.19440800  | -0.46629900 |
| H                 | -4.36144600 | -1.01923900 | 0.21628400  |
| C                 | -4.53248700 | -1.68649200 | -1.82511700 |
| H                 | -4.04959800 | -1.53083200 | -2.79798300 |
| H                 | -4.48547200 | -2.75108000 | -1.57082500 |
| H                 | -5.58373800 | -1.38243900 | -1.87583700 |
| N                 | -2.41708500 | 0.95218900  | -0.58341400 |
| Br                | -7.05095800 | 0.41964500  | 0.10267100  |
| C                 | -1.70576700 | -0.17317600 | -0.42737300 |
| O                 | -2.45577200 | -1.26217700 | -0.59026100 |
| O                 | -0.48599500 | -0.25558900 | -0.15930600 |
| C                 | -1.86522900 | 2.29232200  | -0.55835100 |
| H                 | -0.81917200 | 2.25157900  | -0.24926200 |
| H                 | -1.92694300 | 2.74539400  | -1.55737100 |
| H                 | -2.43538700 | 2.91300300  | 0.14214900  |
| <b>Mo-HKUST-1</b> |             |             |             |
| Mo                | -0.00007300 | -0.00042400 | -1.06100000 |
| Mo                | -0.00001200 | -0.00043700 | 1.06101200  |



|                           |             |             |             |
|---------------------------|-------------|-------------|-------------|
| O                         | -1.49453300 | 1.50653800  | -1.12012000 |
| O                         | 1.49551300  | -1.50618600 | -1.12032200 |
| O                         | -1.50731100 | -1.49470700 | -1.12030000 |
| O                         | 1.50582300  | 1.49541400  | -1.12045800 |
| O                         | 1.50580600  | 1.49520300  | 1.12013900  |
| O                         | -1.50662100 | -1.49517100 | 1.12028300  |
| O                         | 1.49613600  | -1.50585200 | 1.12026200  |
| O                         | -1.49462000 | 1.50667200  | 1.12047400  |
| C                         | -1.91758100 | 1.93340800  | 0.00015600  |
| C                         | 1.91973600  | -1.93195900 | -0.00006000 |
| C                         | -1.93386200 | -1.91789400 | 0.00001400  |
| C                         | 1.93195300  | 1.91897500  | -0.00013400 |
| H                         | -2.68835700 | 2.71157900  | 0.00000200  |
| H                         | 2.70853700  | 2.69135000  | 0.00001800  |
| H                         | -2.71187400 | -2.68882000 | 0.00011700  |
| H                         | 2.69223300  | -2.70841200 | -0.00018100 |
| <b>Mo-Int<sub>0</sub></b> |             |             |             |
| Mo                        | -0.00007800 | -0.00019600 | -1.06075600 |
| Mo                        | 0.00003800  | -0.00021700 | 1.06075700  |
| O                         | -1.50030900 | 1.50289300  | -1.11967700 |
| O                         | 1.50072200  | -1.50262700 | -1.11986500 |
| O                         | -1.50314200 | -1.50039600 | -1.11966700 |
| O                         | 1.50252200  | 1.50058600  | -1.11980600 |
| O                         | 1.50262700  | 1.50052600  | 1.11970700  |
| O                         | -1.50300000 | -1.50040300 | 1.11983300  |
| O                         | 1.50086300  | -1.50267200 | 1.11963600  |
| O                         | -1.50020500 | 1.50290900  | 1.11983500  |
| C                         | -1.92653700 | 1.93020300  | 0.00009900  |
| C                         | 1.92759000  | -1.92946500 | -0.00014300 |

|                           |             |             |             |
|---------------------------|-------------|-------------|-------------|
| C                         | -1.93045100 | -1.92663600 | 0.00010400  |
| C                         | 1.92952100  | 1.92718700  | -0.00006000 |
| H                         | -2.69975500 | 2.70568500  | 0.00012200  |
| H                         | 2.70404300  | 2.70136900  | -0.00006900 |
| H                         | -2.70579300 | -2.69998900 | 0.00015700  |
| H                         | 2.70179300  | -2.70395900 | -0.00021700 |
| C                         | -0.38467898 | 1.16158057  | 3.77443978  |
| C                         | -1.05710643 | -0.15091895 | 4.01821682  |
| H                         | -0.84501711 | 1.90222156  | 3.12226103  |
| H                         | 0.22662789  | 1.57692157  | 4.57818810  |
| H                         | -0.85329969 | -0.59900181 | 4.99554837  |
| C                         | -2.39973919 | -0.50745426 | 3.42198147  |
| H                         | -2.48597323 | -1.59080981 | 3.26901712  |
| H                         | -3.21606542 | -0.19121507 | 4.08400208  |
| H                         | -2.53058221 | -0.01830888 | 2.45093272  |
| N                         | 0.08879962  | -0.05729723 | 3.11578606  |
| C                         | 1.35433656  | -0.60300302 | 3.59214116  |
| H                         | 1.39408604  | -1.67398876 | 3.36299177  |
| H                         | 2.18012872  | -0.10796961 | 3.06855987  |
| H                         | 1.50579994  | -0.47360388 | 4.68002230  |
| <b>Mo-Int<sub>1</sub></b> |             |             |             |
| Mo                        | 0.21016000  | 0.44413600  | -2.67868900 |
| Mo                        | 0.21598000  | 0.43883900  | -0.52647700 |
| O                         | -1.29107300 | 1.94814900  | -2.75439500 |
| O                         | 1.71205000  | -1.05631100 | -2.75615800 |
| O                         | -1.29347800 | -1.05518900 | -2.76423300 |
| O                         | 1.71275500  | 1.94671900  | -2.74821500 |
| O                         | 1.73251600  | 1.95485700  | -0.50297500 |
| O                         | -1.30024000 | -1.06601000 | -0.52131300 |

|                          |             |             |             |
|--------------------------|-------------|-------------|-------------|
| O                        | 1.73280300  | -1.06161800 | -0.51210400 |
| O                        | -1.29683900 | 1.96335100  | -0.50935800 |
| C                        | -1.71371200 | 2.37703400  | -1.63136400 |
| C                        | 2.14351200  | -1.48104600 | -1.63420200 |
| C                        | -1.71915800 | -1.48176000 | -1.64153900 |
| C                        | 2.14333400  | 2.37189800  | -1.62750000 |
| H                        | -2.48739200 | 3.15175000  | -1.64140100 |
| H                        | 2.91640600  | 3.14743400  | -1.64159200 |
| H                        | -2.49343000 | -2.25392400 | -1.64136600 |
| H                        | 2.91415600  | -2.25789400 | -1.64174000 |
| C                        | -1.31566200 | -0.03887600 | 2.56755600  |
| C                        | -0.03060400 | -0.67054300 | 2.92532400  |
| H                        | -1.97874200 | -0.52647600 | 1.85794100  |
| H                        | -1.80189400 | 0.57505100  | 3.32240500  |
| H                        | 0.31766000  | -0.43602700 | 3.92973500  |
| C                        | 0.37049900  | -2.03876200 | 2.43785900  |
| H                        | 1.45820800  | -2.11336200 | 2.31379700  |
| H                        | 0.05484600  | -2.75486900 | 3.20512900  |
| H                        | -0.10431700 | -2.29165900 | 1.48476400  |
| N                        | -0.05673000 | 0.48995400  | 1.97664300  |
| Br                       | -1.00514300 | -1.69997600 | 6.12370800  |
| C                        | 0.40189000  | 1.76332100  | 2.54879300  |
| H                        | 1.48369600  | 1.85821600  | 2.40354100  |
| H                        | -0.09426600 | 2.59337900  | 2.03214900  |
| H                        | 0.18251600  | 1.83056500  | 3.62416600  |
| <b>Mo-Ts<sub>1</sub></b> |             |             |             |
| Mo                       | -0.00007800 | -0.00019600 | -1.06075600 |
| Mo                       | 0.00003800  | -0.00021700 | 1.06075700  |

|    |             |             |             |
|----|-------------|-------------|-------------|
| O  | -1.50030900 | 1.50289300  | -1.11967700 |
| O  | 1.50072200  | -1.50262700 | -1.11986500 |
| O  | -1.50314200 | -1.50039600 | -1.11966700 |
| O  | 1.50252200  | 1.50058600  | -1.11980600 |
| O  | 1.50262700  | 1.50052600  | 1.11970700  |
| O  | -1.50300000 | -1.50040300 | 1.11983300  |
| O  | 1.50086300  | -1.50267200 | 1.11963600  |
| O  | -1.50020500 | 1.50290900  | 1.11983500  |
| C  | -1.92653700 | 1.93020300  | 0.00009900  |
| C  | 1.92759000  | -1.92946500 | -0.00014300 |
| C  | -1.93045100 | -1.92663600 | 0.00010400  |
| C  | 1.92952100  | 1.92718700  | -0.00006000 |
| H  | -2.69975500 | 2.70568500  | 0.00012200  |
| H  | 2.70404300  | 2.70136900  | -0.00006900 |
| H  | -2.70579300 | -2.69998900 | 0.00015700  |
| H  | 2.70179300  | -2.70395900 | -0.00021700 |
| C  | -0.84963673 | -0.28796589 | 4.15708716  |
| C  | 0.43207202  | -0.90792477 | 4.55670212  |
| H  | -1.54450625 | -0.96977618 | 3.66433009  |
| H  | -1.34661602 | 0.33751643  | 4.90269857  |
| H  | 1.09892256  | -0.31645255 | 5.16795000  |
| C  | 0.96330598  | -2.15953522 | 3.91176520  |
| H  | 1.47072763  | -1.93085037 | 2.96700346  |
| H  | 1.67648388  | -2.64347746 | 4.58337728  |
| H  | 0.15153178  | -2.86291077 | 3.70477523  |
| N  | 0.03250262  | 0.40158269  | 3.23201549  |
| Br | -0.24684061 | -1.94832068 | 6.91915298  |
| C  | 0.33488360  | 1.77838051  | 3.61191829  |
| H  | 1.21253140  | 2.13263632  | 3.06482118  |

|                           |             |             |             |
|---------------------------|-------------|-------------|-------------|
| H                         | -0.52062619 | 2.41962502  | 3.35570275  |
| H                         | 0.52251209  | 1.86489618  | 4.69272962  |
| <b>Mo-Int<sub>2</sub></b> |             |             |             |
| Mo                        | 0.20801100  | 0.44731800  | -2.66023600 |
| Mo                        | 0.21620600  | 0.44283800  | -0.47035200 |
| O                         | -1.29496800 | 1.95119600  | -2.75367600 |
| O                         | 1.71424100  | -1.05735500 | -2.74712200 |
| O                         | -1.29370600 | -1.05199600 | -2.74318200 |
| O                         | 1.70999800  | 1.94851600  | -2.73927000 |
| O                         | 1.74337400  | 1.96784000  | -0.48904800 |
| O                         | -1.30460900 | -1.08651900 | -0.49367700 |
| O                         | 1.73873600  | -1.08300700 | -0.49616200 |
| O                         | -1.30411800 | 1.98316000  | -0.50198500 |
| C                         | -1.71226600 | 2.38106900  | -1.62775100 |
| C                         | 2.14099200  | -1.48518900 | -1.62549100 |
| C                         | -1.71611000 | -1.48454000 | -1.62103600 |
| C                         | 2.14252500  | 2.37404100  | -1.61851600 |
| H                         | -2.48742700 | 3.15177100  | -1.64151000 |
| H                         | 2.91637100  | 3.14745500  | -1.64170100 |
| H                         | -2.49346500 | -2.25390300 | -1.64147500 |
| H                         | 2.91412100  | -2.25787300 | -1.64184900 |
| C                         | -0.74183600 | -0.36743100 | 2.57393800  |
| C                         | 0.18098300  | -1.26764800 | 3.40156700  |
| H                         | -1.37887900 | -1.00243900 | 1.94475100  |
| H                         | -1.40722900 | 0.19909000  | 3.25309600  |
| H                         | 0.89822500  | -0.68424500 | 3.97776800  |
| C                         | 0.83061100  | -2.41062600 | 2.65132400  |
| H                         | 1.40248500  | -1.98968600 | 1.81632400  |
| H                         | 1.50363900  | -2.98722600 | 3.29506200  |

|                           |             |             |             |
|---------------------------|-------------|-------------|-------------|
| H                         | 0.07201100  | -3.08637800 | 2.23942500  |
| N                         | 0.08247200  | 0.49952300  | 1.76561500  |
| Br                        | -0.93495200 | -2.15026200 | 5.02192900  |
| C                         | 0.46017900  | 1.70220700  | 2.48096200  |
| H                         | 1.07535600  | 2.34436700  | 1.84124900  |
| H                         | -0.42453100 | 2.29527800  | 2.80334400  |
| H                         | 1.05156900  | 1.51210500  | 3.40123600  |
| <b>Mo-Int<sub>3</sub></b> |             |             |             |
| Mo                        | 0.09859400  | 0.45623100  | -2.76554100 |
| Mo                        | 0.10657400  | 0.44243500  | -0.57734400 |
| O                         | -1.40344000 | 1.96166400  | -2.85615900 |
| O                         | 1.60433600  | -1.04681600 | -2.84642500 |
| O                         | -1.40579000 | -1.04218400 | -2.84861200 |
| O                         | 1.59911800  | 1.96221900  | -2.83863500 |
| O                         | 1.64920800  | 1.96154100  | -0.58781700 |
| O                         | -1.41616400 | -1.07608300 | -0.59905500 |
| O                         | 1.60894300  | -1.09138900 | -0.59686200 |
| O                         | -1.40636700 | 1.99391500  | -0.60524200 |
| C                         | -1.81873000 | 2.39156900  | -1.72962500 |
| C                         | 2.02508700  | -1.48326800 | -1.72519800 |
| C                         | -1.82687100 | -1.47513500 | -1.72638400 |
| C                         | 2.03774400  | 2.37883000  | -1.71863400 |
| H                         | -2.59641900 | 3.16047300  | -1.74214200 |
| H                         | 2.80737900  | 3.15615700  | -1.74233300 |
| H                         | -2.60245700 | -2.24520100 | -1.74210700 |
| H                         | 2.80512900  | -2.24917100 | -1.74248100 |
| C                         | -0.71045700 | -0.46100800 | 2.45393800  |
| C                         | 0.30872900  | -1.07023800 | 3.42053400  |
| H                         | -1.10997700 | -1.26290700 | 1.81722300  |

|                          |             |             |             |
|--------------------------|-------------|-------------|-------------|
| H                        | -1.56032800 | -0.04631100 | 3.02913000  |
| H                        | 0.80779600  | -0.30401800 | 4.01189700  |
| C                        | 1.27624900  | -2.06409700 | 2.81161600  |
| H                        | 1.79403000  | -1.57692200 | 1.97773900  |
| H                        | 2.01293100  | -2.41428600 | 3.54155700  |
| H                        | 0.74038000  | -2.93148300 | 2.40971400  |
| N                        | -0.04310200 | 0.54500200  | 1.65932700  |
| Br                       | -0.72978800 | -2.11220200 | 4.99148700  |
| C                        | 3.78518200  | 1.28485900  | 1.58296400  |
| O                        | 3.43520500  | 2.12017500  | 2.32365800  |
| O                        | 4.19605100  | 0.45667100  | 0.86606900  |
| C                        | -0.06154400 | 1.84119000  | 2.31127600  |
| H                        | 0.45500400  | 1.85606800  | 3.29206400  |
| H                        | 0.43988300  | 2.58663700  | 1.68353900  |
| H                        | -1.09665800 | 2.20198500  | 2.49701100  |
| <b>Mo-Ts<sub>2</sub></b> |             |             |             |
| Mo                       | -0.00007800 | -0.00019600 | -1.06075600 |
| Mo                       | 0.00003800  | -0.00021700 | 1.06075700  |
| O                        | -1.50030900 | 1.50289300  | -1.11967700 |
| O                        | 1.50072200  | -1.50262700 | -1.11986500 |
| O                        | -1.50314200 | -1.50039600 | -1.11966700 |
| O                        | 1.50252200  | 1.50058600  | -1.11980600 |
| O                        | 1.50262700  | 1.50052600  | 1.11970700  |
| O                        | -1.50300000 | -1.50040300 | 1.11983300  |
| O                        | 1.50086300  | -1.50267200 | 1.11963600  |
| O                        | -1.50020500 | 1.50290900  | 1.11983500  |
| C                        | -1.92653700 | 1.93020300  | 0.00009900  |
| C                        | 1.92759000  | -1.92946500 | -0.00014300 |
| C                        | -1.93045100 | -1.92663600 | 0.00010400  |

|    |             |             |             |
|----|-------------|-------------|-------------|
| C  | 1.92952100  | 1.92718700  | -0.00006000 |
| H  | -2.69975500 | 2.70568500  | 0.00012200  |
| H  | 2.70404300  | 2.70136900  | -0.00006900 |
| H  | -2.70579300 | -2.69998900 | 0.00015700  |
| H  | 2.70179300  | -2.70395900 | -0.00021700 |
| C  | -0.91114639 | -0.15764817 | 4.16004421  |
| C  | -0.32510851 | -1.48456618 | 4.65163787  |
| H  | -1.83696953 | -0.35806621 | 3.59983004  |
| H  | -1.18394344 | 0.45025147  | 5.03410973  |
| H  | 0.51068852  | -1.32067148 | 5.33017624  |
| C  | 0.01685591  | -2.49825350 | 3.58136905  |
| H  | 0.83490123  | -2.09439158 | 2.97190364  |
| H  | 0.36326217  | -3.43767587 | 4.02369651  |
| H  | -0.83686191 | -2.69506575 | 2.92685107  |
| N  | 0.04501639  | 0.57881155  | 3.32508109  |
| Br | -1.73747355 | -2.31252000 | 5.93196912  |
| C  | 1.72711926  | 0.91354781  | 3.48626135  |
| O  | 1.89102031  | 2.04156141  | 3.84485589  |
| O  | 2.04775609  | -0.23365865 | 3.40797180  |
| C  | -0.41371640 | 1.97450323  | 3.27499133  |
| H  | -0.49489071 | 2.35919352  | 4.27014162  |
| H  | 0.28952928  | 2.56145274  | 2.72196711  |
| H  | -1.36969522 | 2.01877459  | 2.79640536  |

**Mo-Int<sub>4</sub>**

|    |             |             |             |
|----|-------------|-------------|-------------|
| Mo | -0.12954600 | 0.53087900  | -3.39959000 |
| Mo | -0.13148300 | 0.52917900  | -1.23806600 |
| O  | -1.63149500 | 2.03836900  | -3.48647000 |
| O  | 1.37123400  | -0.96876600 | -3.49574700 |



|    |             |             |             |
|----|-------------|-------------|-------------|
| O  | -1.63089100 | -0.96796800 | -3.49929600 |
| O  | 1.37503100  | 2.03444600  | -3.48445800 |
| O  | 1.39312100  | 2.05658000  | -1.23590100 |
| O  | -1.66571300 | -0.96405000 | -1.25237000 |
| O  | 1.39383000  | -0.97832100 | -1.24812000 |
| O  | -1.64861700 | 2.06149000  | -1.23769200 |
| C  | -2.05618700 | 2.46773200  | -2.36285200 |
| C  | 1.79991000  | -1.39110000 | -2.36892900 |
| C  | -2.06549400 | -1.38429300 | -2.37171200 |
| C  | 1.80087500  | 2.46335500  | -2.36079900 |
| H  | -2.82930500 | 3.24353100  | -2.38061300 |
| H  | 2.57449300  | 3.23921500  | -2.38080400 |
| H  | -2.83534300 | -2.16214300 | -2.38057800 |
| H  | 2.57224300  | -2.16611300 | -2.38095200 |
| C  | -1.02844000 | -0.67358300 | 4.28147400  |
| C  | -0.08725000 | -1.76292300 | 4.79359500  |
| H  | -1.89509300 | -1.20875100 | 3.86084600  |
| H  | -1.38575800 | -0.06820400 | 5.12274500  |
| H  | 0.56341300  | -2.10004200 | 3.99032600  |
| C  | -0.79490900 | -2.91304500 | 5.48495900  |
| H  | -1.42824800 | -3.41873100 | 4.74331400  |
| H  | -0.08453700 | -3.64205300 | 5.88628000  |
| H  | -1.43229400 | -2.56066700 | 6.30525500  |
| N  | -0.45669600 | 0.19465600  | 3.27485600  |
| Br | 1.26931800  | -0.93953100 | 6.14281200  |
| C  | -0.37787500 | -0.33617800 | 1.95768800  |
| O  | -0.53743000 | -1.56657900 | 1.83316100  |
| O  | -0.13173300 | 0.52620000  | 1.03573800  |
| C  | -0.49425600 | 1.62802000  | 3.50412400  |

|                          |             |             |             |
|--------------------------|-------------|-------------|-------------|
| H                        | 0.02923300  | 2.11980300  | 2.68422200  |
| H                        | -1.52609600 | 2.02447100  | 3.53735000  |
| H                        | 0.00217400  | 1.87222400  | 4.45215800  |
| <b>Mo-Ts<sub>3</sub></b> |             |             |             |
| Mo                       | -0.00007800 | -0.00019600 | -1.06075600 |
| Mo                       | 0.00003800  | -0.00021700 | 1.06075700  |
| O                        | -1.50030900 | 1.50289300  | -1.11967700 |
| O                        | 1.50072200  | -1.50262700 | -1.11986500 |
| O                        | -1.50314200 | -1.50039600 | -1.11966700 |
| O                        | 1.50252200  | 1.50058600  | -1.11980600 |
| O                        | 1.50262700  | 1.50052600  | 1.11970700  |
| O                        | -1.50300000 | -1.50040300 | 1.11983300  |
| O                        | 1.50086300  | -1.50267200 | 1.11963600  |
| O                        | -1.50020500 | 1.50290900  | 1.11983500  |
| C                        | -1.92653700 | 1.93020300  | 0.00009900  |
| C                        | 1.92759000  | -1.92946500 | -0.00014300 |
| C                        | -1.93045100 | -1.92663600 | 0.00010400  |
| C                        | 1.92952100  | 1.92718700  | -0.00006000 |
| H                        | -2.69975500 | 2.70568500  | 0.00012200  |
| H                        | 2.70404300  | 2.70136900  | -0.00006900 |
| H                        | -2.70579300 | -2.69998900 | 0.00015700  |
| H                        | 2.70179300  | -2.70395900 | -0.00021700 |
| C                        | -0.20656710 | -0.04019050 | 6.78344667  |
| C                        | 0.39927830  | -1.42474326 | 6.65792264  |
| H                        | -1.29921489 | -0.14160555 | 6.92329448  |
| H                        | 0.19368120  | 0.47033050  | 7.65968708  |
| H                        | 1.41279823  | -1.50001622 | 6.30166016  |
| C                        | -0.43675741 | -2.66280487 | 6.83163418  |
| H                        | -1.06248758 | -2.79057506 | 5.94120139  |

|    |             |             |            |
|----|-------------|-------------|------------|
| H  | 0.19372712  | -3.54514660 | 6.95865411 |
| H  | -1.08210467 | -2.57320805 | 7.71088918 |
| N  | 0.10303143  | 0.74987782  | 5.60139586 |
| Br | 1.52335304  | -1.57441358 | 8.97839853 |
| C  | 0.00256257  | 0.03561521  | 4.40552870 |
| O  | -0.01970063 | -1.22634922 | 4.55378888 |
| O  | -0.03810921 | 0.68155076  | 3.31664376 |
| C  | -0.15094451 | 2.17520539  | 5.64805197 |
| H  | 0.12046033  | 2.60413816  | 4.68243540 |
| H  | -1.21397615 | 2.40359993  | 5.84397575 |
| H  | 0.45294020  | 2.63850970  | 6.43860408 |

**Mo-Int<sub>5</sub>**

|    |             |             |             |
|----|-------------|-------------|-------------|
| Mo | -0.12901300 | 0.53546200  | -3.41280400 |
| Mo | -0.12900700 | 0.53361400  | -1.26888100 |
| O  | -1.63043300 | 2.04055700  | -3.49330600 |
| O  | 1.37078600  | -0.96482500 | -3.49528600 |
| O  | -1.63224600 | -0.96308500 | -3.49493300 |
| O  | 1.37357600  | 2.03804000  | -3.49408000 |
| O  | 1.38500800  | 2.05108400  | -1.24918500 |
| O  | -1.64662600 | -0.97142700 | -1.25073700 |
| O  | 1.38395800  | -0.97407700 | -1.25152200 |
| O  | -1.64304600 | 2.05280400  | -1.24811200 |
| C  | -2.05649400 | 2.46773000  | -2.37035800 |
| C  | 1.79903000  | -1.39148700 | -2.37187300 |
| C  | -2.06113000 | -1.38830300 | -2.37148300 |
| C  | 1.80015800  | 2.46503500  | -2.37102200 |
| H  | -2.82930500 | 3.24353100  | -2.38061300 |
| H  | 2.57449300  | 3.23921500  | -2.38080400 |
| H  | -2.83534300 | -2.16214300 | -2.38057800 |

|    |             |             |             |
|----|-------------|-------------|-------------|
| H  | 2.57224300  | -2.16611300 | -2.38095200 |
| C  | -0.20638200 | -0.46291700 | 4.48131600  |
| C  | -0.00858600 | -1.74935700 | 3.66987500  |
| H  | -1.23143200 | -0.37316800 | 4.87741600  |
| H  | 0.50016500  | -0.42313000 | 5.31552600  |
| H  | 1.03136500  | -2.07703700 | 3.74994700  |
| C  | -0.94927300 | -2.88714100 | 3.99306300  |
| H  | -1.99688400 | -2.57150200 | 3.90443700  |
| H  | -0.77626600 | -3.73420200 | 3.32060100  |
| H  | -0.74031000 | -3.20073200 | 5.02234300  |
| N  | 0.03064500  | 0.55374800  | 3.45560300  |
| Br | 1.43964000  | -2.32468700 | 6.94702300  |
| C  | -0.09526000 | 0.03119100  | 2.21390500  |
| O  | -0.20799800 | -1.30547500 | 2.26970400  |
| O  | -0.10968900 | 0.66941000  | 1.15176900  |
| C  | 0.02348300  | 1.97352200  | 3.72977400  |
| H  | 0.20069700  | 2.51116000  | 2.79579700  |
| H  | -0.94455200 | 2.28888800  | 4.14617800  |
| H  | 0.80945900  | 2.21838800  | 4.45237200  |

**Zn-HKUST-1**

|    |             |             |             |
|----|-------------|-------------|-------------|
| Zn | -1.39943500 | -0.00022200 | 0.01617700  |
| Zn | 1.40007800  | 0.00080700  | -0.01607200 |
| O  | -1.70256800 | 0.85033000  | 1.77486400  |
| O  | -1.74488300 | -0.85335600 | -1.73338800 |
| O  | -0.52371000 | -1.74850200 | 0.85410200  |
| O  | -0.54645300 | 1.74856300  | -0.84152000 |
| O  | 1.71192300  | 1.75510100  | -0.87226900 |
| O  | 1.73468500  | -1.75394600 | 0.83024600  |
| O  | 0.51342500  | -0.84689800 | -1.75405000 |

|   |             |             |             |
|---|-------------|-------------|-------------|
| O | 0.55572000  | 0.84791900  | 1.74197600  |
| C | -0.55639800 | 1.09866400  | 2.27139800  |
| C | -0.61036900 | -1.10027100 | -2.25679600 |
| C | 0.59752100  | -2.26452500 | 1.09153600  |
| C | 0.56853400  | 2.26479200  | -1.10649300 |
| H | -0.55439200 | 1.57952400  | 3.26079000  |
| H | 0.57206200  | 3.25380900  | -1.58812600 |
| H | 0.61324100  | -3.25401900 | 1.57194500  |
| H | -0.63103200 | -1.58252700 | -3.24529500 |

**Zn-Int<sub>0</sub>**

|    |             |             |             |
|----|-------------|-------------|-------------|
| Zn | -2.29759400 | -0.17387400 | 0.11065900  |
| Zn | 0.66747100  | 0.15574400  | -0.14098100 |
| O  | -2.44671000 | -0.67858900 | 2.02236000  |
| O  | -2.87588400 | 0.25258700  | -1.73537600 |
| O  | -1.41059900 | -2.00150500 | -0.43878000 |
| O  | -1.76051200 | 1.81700000  | 0.54695500  |
| O  | 0.48882600  | 2.08867100  | 0.35256400  |
| O  | 0.84481400  | -1.76310300 | -0.63093100 |
| O  | -0.64189800 | 0.50512300  | -1.93978600 |
| O  | -0.20768500 | -0.43685900 | 1.85728500  |
| C  | -1.26311100 | -0.69409800 | 2.49132800  |
| C  | -1.81459900 | 0.51711800  | -2.38928700 |
| C  | -0.24523700 | -2.41832200 | -0.67149500 |
| C  | -0.69689900 | 2.48729100  | 0.59281900  |
| H  | -1.20229400 | -0.96407000 | 3.56076200  |
| H  | -0.76531200 | 3.53930300  | 0.86559000  |
| H  | -0.12271100 | -3.46502600 | -0.94551400 |
| H  | -1.98568500 | 0.77616300  | -3.44715100 |
| C  | 3.51346700  | 0.17669400  | 1.23556500  |

|   |            |             |             |
|---|------------|-------------|-------------|
| C | 4.02595100 | -0.41110900 | -0.03352300 |
| H | 2.91263500 | -0.43077100 | 1.90727000  |
| H | 4.07909200 | 0.97225300  | 1.71422500  |
| H | 4.93603500 | 0.05752300  | -0.40634800 |
| C | 3.88312200 | -1.86270500 | -0.41781100 |
| H | 3.87416700 | -1.97410900 | -1.50837600 |
| H | 4.74335600 | -2.41812300 | -0.02330900 |
| H | 2.96496800 | -2.30003000 | -0.03000000 |
| N | 2.87419800 | 0.53212700  | -0.06262900 |
| C | 3.20198500 | 1.89182100  | -0.56335600 |
| H | 3.09275200 | 1.89699300  | -1.65317000 |
| H | 2.47505700 | 2.57032900  | -0.11860400 |
| H | 4.23135300 | 2.17182400  | -0.30707700 |

**Zn-Int<sub>1</sub>**

|    |             |             |             |
|----|-------------|-------------|-------------|
| Zn | -3.13175300 | 0.34496900  | 1.02359400  |
| Zn | 0.00124700  | 0.46787100  | 0.35546500  |
| O  | -3.85705400 | 0.06133800  | 2.92646900  |
| O  | -3.60970500 | 0.65706100  | -0.93970100 |
| O  | -2.64981500 | -1.63203000 | 0.57321200  |
| O  | -2.60379100 | 2.35577700  | 1.17863200  |
| O  | -0.33238000 | 2.32523200  | 1.12321700  |
| O  | -0.38397300 | -1.52094800 | 0.59025100  |
| O  | -1.35831500 | 0.71148300  | -1.16188900 |
| O  | -1.62822500 | 0.09145000  | 2.75996000  |
| C  | -2.68368300 | -0.01890900 | 3.42687400  |
| C  | -2.53936700 | 0.77153000  | -1.59744000 |
| C  | -1.49606100 | -2.12294500 | 0.50817200  |
| C  | -1.46692300 | 2.87977200  | 1.26462500  |
| H  | -2.60194600 | -0.19872900 | 4.50288900  |

|                          |             |             |             |
|--------------------------|-------------|-------------|-------------|
| H                        | -1.46658000 | 3.96264900  | 1.48104300  |
| H                        | -1.44089000 | -3.21025200 | 0.34214600  |
| H                        | -2.62744800 | 0.94016000  | -2.67013400 |
| C                        | 2.65967100  | -1.02007300 | -0.14602000 |
| C                        | 2.36786000  | -0.47212000 | -1.48539900 |
| H                        | 2.02681600  | -1.79554900 | 0.27528000  |
| H                        | 3.70426000  | -0.99994600 | 0.15784900  |
| H                        | 3.25876000  | -0.07999000 | -1.97946900 |
| C                        | 1.29583500  | -1.00810800 | -2.40055800 |
| H                        | 1.75478600  | -1.75429700 | -3.06127800 |
| H                        | 0.47930500  | -1.48963100 | -1.85590700 |
| H                        | 0.87502500  | -0.21385000 | -3.02869600 |
| N                        | 1.99133800  | 0.31758300  | -0.26014200 |
| Br                       | 5.88861600  | -0.41334200 | -1.82364200 |
| C                        | 2.86658500  | 1.48157600  | 0.01821200  |
| H                        | 2.46012400  | 2.36011000  | -0.49338400 |
| H                        | 2.87164800  | 1.67544700  | 1.09662400  |
| H                        | 3.88864000  | 1.29107100  | -0.33113200 |
| <b>Zn-Ts<sub>1</sub></b> |             |             |             |
| Zn                       | -1.42789900 | -0.00545000 | 0.00413200  |
| Zn                       | 1.42804500  | 0.00560700  | -0.00390900 |
| O                        | -1.70521900 | -0.31489500 | 1.94294100  |
| O                        | -1.71954700 | 0.30064100  | -1.93309100 |
| O                        | -0.53922300 | -1.93329500 | -0.30506000 |
| O                        | -0.55348800 | 1.92923300  | 0.30841100  |
| O                        | 1.70515000  | 1.94489700  | 0.30247500  |
| O                        | 1.71942500  | -1.93112600 | -0.31307800 |
| O                        | 0.53908100  | 0.30888400  | -1.93257700 |
| O                        | 0.55339900  | -0.30450800 | 1.92972400  |

|                           |             |             |             |
|---------------------------|-------------|-------------|-------------|
| C                         | -0.56253100 | -0.39968400 | 2.50231500  |
| C                         | -0.58075400 | 0.39448300  | -2.49898300 |
| C                         | 0.58064000  | -2.49830000 | -0.39904300 |
| C                         | 0.56247800  | 2.50307500  | 0.39514500  |
| H                         | -0.56784000 | -0.57234600 | 3.58833800  |
| H                         | 0.56786900  | 3.58919300  | 0.56720600  |
| H                         | 0.59356300  | -3.58424900 | -0.57177800 |
| H                         | -0.59361700 | 0.56659700  | -3.58503000 |
| C                         | 4.34020215  | -1.20370801 | 0.50244489  |
| C                         | 4.87659999  | -0.89468338 | -0.84081977 |
| H                         | 3.67651825  | -2.06894848 | 0.53312056  |
| H                         | 5.05785357  | -1.20775348 | 1.32648763  |
| H                         | 5.65088480  | -0.14275550 | -0.90376802 |
| C                         | 4.18451601  | -1.31439838 | -2.10904568 |
| H                         | 3.51042841  | -0.52631226 | -2.46546655 |
| H                         | 4.93147801  | -1.50942555 | -2.88222387 |
| H                         | 3.59777681  | -2.22422339 | -1.95278552 |
| N                         | 3.64240213  | 0.04893787  | 0.27265339  |
| Br                        | 6.95327338  | -2.56581572 | -0.90013162 |
| C                         | 4.20258660  | 1.18449760  | 0.99878115  |
| H                         | 3.83735750  | 2.12057161  | 0.56820615  |
| H                         | 3.88344005  | 1.13415969  | 2.04983608  |
| H                         | 5.30260887  | 1.17698795  | 0.96956531  |
| <b>Zn-Int<sub>2</sub></b> |             |             |             |
| Zn                        | -3.06084600 | 0.35483300  | 1.01712000  |
| Zn                        | 0.13608800  | 0.47423000  | 0.32616300  |
| O                         | -3.84992400 | 0.04842700  | 2.91774600  |
| O                         | -3.60139700 | 0.66666800  | -0.93880700 |
| O                         | -2.61669700 | -1.61807700 | 0.56775100  |



|    |             |             |             |
|----|-------------|-------------|-------------|
| O  | -2.64241800 | 2.37681100  | 1.20543300  |
| O  | -0.37238900 | 2.31501700  | 1.12514700  |
| O  | -0.34664300 | -1.52964400 | 0.50324000  |
| O  | -1.34918900 | 0.69695500  | -1.16139100 |
| O  | -1.61902200 | 0.08118100  | 2.77004400  |
| C  | -2.68094600 | -0.02772900 | 3.42564400  |
| C  | -2.52720400 | 0.76887400  | -1.59677700 |
| C  | -1.46430600 | -2.11609700 | 0.47417900  |
| C  | -1.49081100 | 2.88059700  | 1.27250400  |
| H  | -2.60194600 | -0.19872900 | 4.50288900  |
| H  | -1.46658000 | 3.96264900  | 1.48104300  |
| H  | -1.44089000 | -3.21025200 | 0.34214600  |
| H  | -2.62744800 | 0.94016000  | -2.67013400 |
| C  | 2.87557400  | -0.54209100 | -0.44117100 |
| C  | 3.12354100  | -0.50053900 | -1.95763600 |
| H  | 2.37845400  | -1.49019700 | -0.19566900 |
| H  | 3.84863700  | -0.53621700 | 0.08353500  |
| H  | 3.52595000  | 0.46476900  | -2.26409200 |
| C  | 1.95672300  | -0.93472200 | -2.82293100 |
| H  | 2.19468300  | -0.86545400 | -3.88955500 |
| H  | 1.66182900  | -1.96492800 | -2.59338500 |
| H  | 1.10288200  | -0.27921400 | -2.61248100 |
| N  | 2.05829400  | 0.58207300  | -0.05684800 |
| Br | 4.76355300  | -1.76005100 | -2.44090000 |
| C  | 2.82062900  | 1.79250400  | 0.17974100  |
| H  | 2.15881600  | 2.58758800  | 0.53999800  |
| H  | 3.61187000  | 1.64358000  | 0.94553800  |
| H  | 3.33553800  | 2.18712400  | -0.72044100 |

**Zn-Int<sub>3</sub>**

|    |             |             |             |
|----|-------------|-------------|-------------|
| Zn | -3.46222100 | 0.32124400  | 0.60411700  |
| Zn | -0.26886300 | 0.41716000  | -0.08133100 |
| O  | -4.25792000 | 0.00672100  | 2.49558500  |
| O  | -3.93776300 | 0.62477500  | -1.35330000 |
| O  | -3.01575800 | -1.65539400 | 0.14796800  |
| O  | -3.06168500 | 2.34984500  | 0.78454700  |
| O  | -0.79497000 | 2.27479700  | 0.66425200  |
| O  | -0.74548100 | -1.57541500 | 0.13233800  |
| O  | -1.68608400 | 0.62993000  | -1.64783400 |
| O  | -2.02798500 | 0.06169200  | 2.33853500  |
| C  | -3.08653100 | -0.06018400 | 2.99824800  |
| C  | -2.88081300 | 0.71941300  | -2.03721100 |
| C  | -1.86442200 | -2.15704400 | 0.06730500  |
| C  | -1.90551600 | 2.84679400  | 0.83466000  |
| H  | -3.00048800 | -0.23547700 | 4.07142400  |
| H  | -1.86500700 | 3.92594100  | 1.04983800  |
| H  | -1.83931100 | -3.24710600 | -0.08903700 |
| H  | -3.02608600 | 0.90346500  | -3.10164000 |
| C  | 2.54104800  | -0.44470500 | 0.32373700  |
| C  | 3.54388100  | -1.07316600 | -0.65699500 |
| H  | 1.94855700  | -1.25677500 | 0.76531600  |
| H  | 3.09762200  | 0.03815600  | 1.14863800  |
| H  | 4.06166300  | -0.30740700 | -1.23431300 |
| C  | 2.98144800  | -2.17357200 | -1.53306800 |
| H  | 2.13105600  | -1.76383300 | -2.09021800 |
| H  | 3.72363600  | -2.55090800 | -2.24450700 |
| H  | 2.61748500  | -3.00905900 | -0.92485900 |
| N  | 1.68834200  | 0.49671500  | -0.37803100 |
| Br | 5.16086600  | -1.88974200 | 0.43210800  |

|                          |             |             |             |
|--------------------------|-------------|-------------|-------------|
| C                        | 0.63447800  | 0.62210400  | -3.71357800 |
| O                        | 0.72276300  | 1.78542600  | -3.62840800 |
| O                        | 0.55773000  | -0.53553300 | -3.86718400 |
| C                        | 2.30404000  | 1.81278400  | -0.47402900 |
| H                        | 3.23696000  | 1.81303200  | -1.07025400 |
| H                        | 1.62111600  | 2.51792500  | -0.95985300 |
| H                        | 2.56550100  | 2.23809600  | 0.51771100  |
| <b>Zn-Ts<sub>2</sub></b> |             |             |             |
| Zn                       | -1.42789900 | -0.00545000 | 0.00413200  |
| Zn                       | 1.42804500  | 0.00560700  | -0.00390900 |
| O                        | -1.70521900 | -0.31489500 | 1.94294100  |
| O                        | -1.71954700 | 0.30064100  | -1.93309100 |
| O                        | -0.53922300 | -1.93329500 | -0.30506000 |
| O                        | -0.55348800 | 1.92923300  | 0.30841100  |
| O                        | 1.70515000  | 1.94489700  | 0.30247500  |
| O                        | 1.71942500  | -1.93112600 | -0.31307800 |
| O                        | 0.53908100  | 0.30888400  | -1.93257700 |
| O                        | 0.55339900  | -0.30450800 | 1.92972400  |
| C                        | -0.56253100 | -0.39968400 | 2.50231500  |
| C                        | -0.58075400 | 0.39448300  | -2.49898300 |
| C                        | 0.58064000  | -2.49830000 | -0.39904300 |
| C                        | 0.56247800  | 2.50307500  | 0.39514500  |
| H                        | -0.56784000 | -0.57234600 | 3.58833800  |
| H                        | 0.56786900  | 3.58919300  | 0.56720600  |
| H                        | 0.59356300  | -3.58424900 | -0.57177800 |
| H                        | -0.59361700 | 0.56659700  | -3.58503000 |
| C                        | 4.65585607  | 0.29662174  | 1.40754691  |
| C                        | 5.16130764  | -1.07541440 | 1.86345442  |
| H                        | 3.97083034  | 0.69956228  | 2.16881854  |

|                           |            |             |             |
|---------------------------|------------|-------------|-------------|
| H                         | 5.51244708 | 0.98229974  | 1.34392088  |
| H                         | 5.95011314 | -1.44379324 | 1.20930201  |
| C                         | 4.10165046 | -2.12821457 | 2.10576718  |
| H                         | 3.62303358 | -2.36358824 | 1.14697847  |
| H                         | 4.54390242 | -3.05159395 | 2.49299967  |
| H                         | 3.33283954 | -1.77275766 | 2.79753529  |
| N                         | 3.98662082 | 0.21982937  | 0.10370233  |
| Br                        | 6.20779854 | -0.75877140 | 3.63097377  |
| C                         | 4.31039930 | -0.55789810 | -1.64773668 |
| O                         | 5.12057649 | -0.09280071 | -2.39283108 |
| O                         | 3.85725915 | -1.53182891 | -1.12702308 |
| C                         | 3.93814378 | 1.58634763  | -0.43590663 |
| H                         | 4.92998145 | 1.98427793  | -0.48891142 |
| H                         | 3.50841223 | 1.56789998  | -1.41564664 |
| H                         | 3.34075165 | 2.20154114  | 0.20406179  |
| <b>Zn-Int<sub>4</sub></b> |            |             |             |
| Zn                        | 3.82679400 | -0.53913100 | 0.00856100  |
| Zn                        | 0.84126300 | 0.74166300  | 0.00458600  |
| O                         | 4.82903900 | 1.25824700  | -0.18558300 |
| O                         | 4.15368600 | -2.59131200 | 0.16792100  |
| O                         | 3.33790400 | -0.50514800 | -2.00854500 |
| O                         | 3.49074700 | -0.16036100 | 2.01856100  |
| O                         | 1.29501200 | 0.43243300  | 1.97760400  |
| O                         | 1.14314900 | 0.08662100  | -1.91487400 |
| O                         | 2.00737900 | -1.96383500 | 0.19566600  |
| O                         | 2.66239700 | 1.88509600  | -0.16474400 |
| C                         | 3.89544600 | 2.11430500  | -0.22504500 |
| C                         | 2.90184600 | -2.83900700 | 0.23492400  |
| C                         | 2.20132400 | -0.27625400 | -2.49907900 |

|                          |             |             |             |
|--------------------------|-------------|-------------|-------------|
| C                        | 2.38955900  | 0.15723600  | 2.54068200  |
| H                        | 4.19125700  | 3.16650400  | -0.32148200 |
| H                        | 2.39074100  | 0.20230300  | 3.64174100  |
| H                        | 2.13029400  | -0.40967600 | -3.59109200 |
| H                        | 2.59457700  | -3.88879800 | 0.33303300  |
| C                        | -3.90031000 | 0.96779600  | 0.35252000  |
| C                        | -4.21692000 | 0.06022700  | -0.84159000 |
| H                        | -4.79553700 | 1.53434400  | 0.63241400  |
| H                        | -3.60560500 | 0.34419500  | 1.20164100  |
| H                        | -3.39177600 | -0.63025500 | -1.00975400 |
| C                        | -4.64248100 | 0.76986600  | -2.11216300 |
| H                        | -3.81659600 | 1.41145300  | -2.44505100 |
| H                        | -4.86216400 | 0.05540400  | -2.91114800 |
| H                        | -5.52907500 | 1.39383900  | -1.94882300 |
| N                        | -2.84158900 | 1.92025500  | 0.04197600  |
| Br                       | -5.74700900 | -1.19901100 | -0.24399500 |
| C                        | -1.52484300 | 1.48770500  | 0.03592000  |
| O                        | -1.29027300 | 0.24310800  | 0.16127100  |
| O                        | -0.57929000 | 2.33595700  | -0.10772900 |
| C                        | -3.16306900 | 3.33455700  | -0.03960600 |
| H                        | -2.24713200 | 3.87815600  | -0.27176000 |
| H                        | -3.90520300 | 3.52563700  | -0.82714000 |
| H                        | -3.56834000 | 3.71024400  | 0.91315500  |
| <b>Zn-Ts<sub>3</sub></b> |             |             |             |
| Zn                       | 4.04702200  | -0.47669900 | -0.01690100 |
| Zn                       | 1.17655500  | 0.29928800  | 0.10224100  |
| O                        | 4.88399000  | 1.12254000  | -0.88642600 |
| O                        | 4.04019800  | -2.29786500 | 0.81596300  |
| O                        | 3.07205000  | -1.10643600 | -1.77054100 |

|    |             |             |             |
|----|-------------|-------------|-------------|
| O  | 3.68001100  | 0.52015400  | 1.79652200  |
| O  | 1.47985800  | 1.10618400  | 1.90025900  |
| O  | 0.87452500  | -0.50422100 | -1.68822800 |
| O  | 1.86931200  | -1.70166700 | 0.90095800  |
| O  | 2.70944400  | 1.71333000  | -0.79502100 |
| C  | 3.90953000  | 1.92326300  | -1.08791400 |
| C  | 2.81272100  | -2.49667100 | 1.10832100  |
| C  | 1.89467100  | -1.03194300 | -2.22621700 |
| C  | 2.66541400  | 1.03984500  | 2.34387100  |
| H  | 4.17564600  | 2.88331700  | -1.56996900 |
| H  | 2.81233700  | 1.49977600  | 3.32520100  |
| H  | 1.71378000  | -1.47275100 | -3.21035400 |
| H  | 2.59007800  | -3.46451700 | 1.58376500  |
| C  | -4.09164400 | 0.88950300  | -0.68999200 |
| C  | -4.20093600 | -0.53816600 | -0.19163000 |
| H  | -4.03646300 | 0.88065500  | -1.79387200 |
| H  | -4.97555200 | 1.45864700  | -0.40224800 |
| H  | -4.11102500 | -0.71111100 | 0.86770600  |
| C  | -4.34867200 | -1.69445900 | -1.14219600 |
| H  | -3.37366300 | -1.90706000 | -1.59560400 |
| H  | -4.70603000 | -2.58384500 | -0.61979200 |
| H  | -5.06373800 | -1.45375200 | -1.93441100 |
| N  | -2.91121500 | 1.52368500  | -0.11440300 |
| Br | -6.75912900 | -0.47887600 | 0.43553700  |
| C  | -1.81431600 | 0.68200900  | -0.03229400 |
| O  | -2.08007800 | -0.55543000 | -0.15764300 |
| O  | -0.67132600 | 1.19565200  | 0.18731700  |
| C  | -2.74958200 | 2.95461900  | -0.27360900 |
| H  | -1.81829200 | 3.25262400  | 0.21046500  |

|                           |             |             |             |
|---------------------------|-------------|-------------|-------------|
| H                         | -2.70289500 | 3.25085900  | -1.33600000 |
| H                         | -3.59045400 | 3.47841200  | 0.19661700  |
| <b>Zn-Int<sub>5</sub></b> |             |             |             |
| Zn                        | 3.91818100  | -0.58217400 | 0.00732400  |
| Zn                        | 1.02675900  | 0.58515100  | 0.01336100  |
| O                         | 4.78007400  | 1.25398500  | -0.18124500 |
| O                         | 4.16158400  | -2.60753600 | 0.16968400  |
| O                         | 3.34517900  | -0.49974900 | -2.00342900 |
| O                         | 3.48960400  | -0.15998100 | 2.00925000  |
| O                         | 1.27265300  | 0.33182000  | 1.98481200  |
| O                         | 1.13530800  | 0.01385100  | -1.90561500 |
| O                         | 2.02392700  | -1.95135500 | 0.18634700  |
| O                         | 2.62117100  | 1.93698100  | -0.15362900 |
| C                         | 3.86530100  | 2.12630800  | -0.21940900 |
| C                         | 2.90596100  | -2.84169700 | 0.23253100  |
| C                         | 2.20819400  | -0.30424600 | -2.50008500 |
| C                         | 2.38866300  | 0.11907100  | 2.54606700  |
| H                         | 4.19125700  | 3.16650400  | -0.32148200 |
| H                         | 2.39074100  | 0.20230300  | 3.64174100  |
| H                         | 2.13029400  | -0.40967600 | -3.59109200 |
| H                         | 2.59457700  | -3.88879800 | 0.33303300  |
| C                         | -4.20858700 | 0.94579200  | -0.17083300 |
| C                         | -3.58032500 | -0.45822800 | -0.29528500 |
| H                         | -4.89797500 | 1.16068100  | -0.99057200 |
| H                         | -4.75792500 | 1.06915100  | 0.76698500  |
| H                         | -3.90343600 | -1.10860700 | 0.51452400  |
| C                         | -3.76405700 | -1.12396900 | -1.64368400 |
| H                         | -3.44407100 | -0.46243000 | -2.45915700 |
| H                         | -3.18336900 | -2.05161000 | -1.69630800 |

|    |             |             |             |
|----|-------------|-------------|-------------|
| H  | -4.82896200 | -1.35770200 | -1.74898900 |
| N  | -3.02224200 | 1.81444600  | -0.22854200 |
| Br | -6.88810600 | -0.96858400 | 0.41310800  |
| C  | -1.89217600 | 1.10530900  | -0.10343300 |
| O  | -2.12196000 | -0.20312600 | -0.08223700 |
| O  | -0.73702400 | 1.58425300  | -0.01554700 |
| C  | -3.08873900 | 3.25884400  | -0.16407600 |
| H  | -2.07380500 | 3.66090300  | -0.19522300 |
| H  | -3.66251400 | 3.64671700  | -1.01377600 |
| H  | -3.57783100 | 3.58104100  | 0.76447200  |

**Zr-HKUST-1**

|    |             |             |             |
|----|-------------|-------------|-------------|
| O  | -1.39165300 | -1.40021500 | 1.12088400  |
| O  | 1.39197100  | 1.39703900  | 1.12273600  |
| O  | -1.42441500 | 1.36363600  | 1.10375400  |
| O  | 1.42458800  | -1.36680100 | 1.10163000  |
| O  | 1.41429000  | -1.37568500 | -1.12337400 |
| O  | -1.41426100 | 1.37839700  | -1.12123500 |
| O  | 1.40145600  | 1.38907200  | -1.10170100 |
| O  | -1.40224100 | -1.38568900 | -1.10350400 |
| C  | -1.82733100 | -1.83146100 | 0.00802700  |
| C  | 1.82664700  | 1.83197200  | 0.01087800  |
| C  | -1.86068300 | 1.79802700  | -0.00804300 |
| C  | 1.86179900  | -1.79725800 | -0.01126700 |
| H  | -2.60371100 | -2.60233600 | 0.00630700  |
| H  | 2.64637200  | -2.55980100 | -0.01154600 |
| H  | -2.64739700 | 2.55837200  | -0.00618600 |
| H  | 2.59944500  | 2.60644400  | 0.01109800  |
| Zr | 0.00018594  | -0.00197611 | 1.52070415  |
| Zr | 0.00003061  | 0.00144382  | -1.37929383 |



**Zr-Int<sub>0</sub>**

|    |             |             |             |
|----|-------------|-------------|-------------|
| O  | -1.12153100 | 1.44627200  | -1.49767400 |
| O  | -1.12192400 | -1.44617100 | 1.49752300  |
| O  | -1.12291800 | 1.49850200  | 1.44620900  |
| O  | -1.12278300 | -1.49841600 | -1.44641900 |
| O  | 1.12155800  | -1.49799100 | -1.44569100 |
| O  | 1.12142400  | 1.49788600  | 1.44585600  |
| O  | 1.12243100  | -1.44656300 | 1.49813400  |
| O  | 1.12282200  | 1.44649900  | -1.49791400 |
| C  | 0.00062900  | 1.87415000  | -1.94001800 |
| C  | 0.00013600  | -1.87407500 | 1.94010600  |
| C  | -0.00054000 | 1.94128000  | 1.87286300  |
| C  | -0.00037200 | -1.94125100 | -1.87292700 |
| H  | 0.00034700  | 2.63356300  | -2.72548400 |
| H  | 0.00002100  | -2.72780300 | -2.63122400 |
| H  | -0.00020600 | 2.72785300  | 2.63113900  |
| H  | -0.00033600 | -2.63343000 | 2.72562700  |
| Zr | -1.54114400 | 0.00004800  | -0.00013400 |
| Zr | 1.54135500  | -0.00007200 | 0.00012400  |
| C  | -3.95084143 | -1.03123340 | 0.44377488  |
| C  | -4.20406718 | 0.28437744  | 1.10656122  |
| H  | -3.31219470 | -1.77308952 | 0.92082544  |
| H  | -4.74248398 | -1.44519812 | -0.18403950 |
| H  | -5.17472792 | 0.73582745  | 0.87961852  |
| C  | -3.63644215 | 0.64270344  | 2.46106521  |
| H  | -3.48091163 | 1.72568834  | 2.54736489  |
| H  | -4.31782239 | 0.33177201  | 3.26338039  |
| H  | -2.67060679 | 0.14998652  | 2.61504858  |

|                           |             |             |             |
|---------------------------|-------------|-------------|-------------|
| N                         | -3.27670089 | 0.18342273  | -0.01862627 |
| C                         | -3.72242430 | 0.72707670  | -1.29614875 |
| H                         | -3.48797003 | 1.79698029  | -1.33406237 |
| H                         | -3.18262814 | 0.22728563  | -2.10852620 |
| H                         | -4.80718787 | 0.60167251  | -1.47145552 |
| <b>Zr-Int<sub>1</sub></b> |             |             |             |
| O                         | -2.79283800 | 2.09813900  | -1.78078700 |
| O                         | -2.84525900 | -0.81358600 | 1.22320700  |
| O                         | -2.80089000 | 2.14826700  | 1.15626700  |
| O                         | -2.81910200 | -0.85132200 | -1.75049400 |
| O                         | -0.56409900 | -0.82230000 | -1.77735600 |
| O                         | -0.54554000 | 2.16371300  | 1.14850800  |
| O                         | -0.58976300 | -0.78835400 | 1.23385200  |
| O                         | -0.53641700 | 2.11280600  | -1.79196400 |
| C                         | -1.66934200 | 2.52639700  | -2.22448400 |
| C                         | -1.71046400 | -1.21668100 | 1.65749700  |
| C                         | -1.67444800 | 2.59259700  | 1.57566700  |
| C                         | -1.68782200 | -1.27361900 | -2.17933700 |
| H                         | -1.68474700 | 3.28298200  | -3.01593400 |
| H                         | -1.68507300 | -2.07838400 | -2.92167400 |
| H                         | -1.68530000 | 3.37727200  | 2.34068900  |
| H                         | -1.68543000 | -1.98401100 | 2.43517700  |
| Zr                        | -3.23983500 | 0.64383100  | -0.28860000 |
| Zr                        | -0.08300200 | 0.65554000  | -0.29437300 |
| C                         | 2.45688500  | -1.00719600 | 1.33106900  |
| C                         | 2.56902500  | -1.70093400 | 0.03248600  |
| H                         | 1.60182700  | -1.19851100 | 1.97192100  |
| H                         | 3.39763700  | -0.72138600 | 1.79913000  |
| H                         | 3.60195300  | -1.79527900 | -0.30541100 |

|                          |             |             |             |
|--------------------------|-------------|-------------|-------------|
| C                        | 1.62927400  | -2.78762200 | -0.42714500 |
| H                        | 1.54023600  | -2.79934900 | -1.51940200 |
| H                        | 2.04201700  | -3.75380000 | -0.10833200 |
| H                        | 0.62919700  | -2.67671600 | -0.00184700 |
| N                        | 2.10749600  | -0.26993300 | 0.07218400  |
| Br                       | 6.05729000  | -1.36812700 | 0.99317200  |
| C                        | 3.12805500  | 0.71546900  | -0.36516700 |
| H                        | 3.04861800  | 0.85682200  | -1.45060100 |
| H                        | 2.94478800  | 1.67540200  | 0.13705800  |
| H                        | 4.14412900  | 0.37614700  | -0.11674300 |
| <b>Zr-Ts<sub>1</sub></b> |             |             |             |
| O                        | -1.12153100 | 1.44627200  | -1.49767400 |
| O                        | -1.12192400 | -1.44617100 | 1.49752300  |
| O                        | -1.12291800 | 1.49850200  | 1.44620900  |
| O                        | -1.12278300 | -1.49841600 | -1.44641900 |
| O                        | 1.12155800  | -1.49799100 | -1.44569100 |
| O                        | 1.12142400  | 1.49788600  | 1.44585600  |
| O                        | 1.12243100  | -1.44656300 | 1.49813400  |
| O                        | 1.12282200  | 1.44649900  | -1.49791400 |
| C                        | 0.00062900  | 1.87415000  | -1.94001800 |
| C                        | 0.00013600  | -1.87407500 | 1.94010600  |
| C                        | -0.00054000 | 1.94128000  | 1.87286300  |
| C                        | -0.00037200 | -1.94125100 | -1.87292700 |
| H                        | 0.00034700  | 2.63356300  | -2.72548400 |
| H                        | 0.00002100  | -2.72780300 | -2.63122400 |
| H                        | -0.00020600 | 2.72785300  | 2.63113900  |
| H                        | -0.00033600 | -2.63343000 | 2.72562700  |
| Zr                       | -1.54114400 | 0.00004800  | -0.00013400 |
| Zr                       | 1.54135500  | -0.00007200 | 0.00012400  |

|                           |             |             |             |
|---------------------------|-------------|-------------|-------------|
| C                         | 4.27434828  | -0.36798777 | 1.51869370  |
| C                         | 4.86752928  | -1.22378996 | 0.46830438  |
| H                         | 3.55737765  | -0.87897024 | 2.16282756  |
| H                         | 4.96626272  | 0.25628981  | 2.08932341  |
| H                         | 5.68870281  | -0.81123095 | -0.10120775 |
| C                         | 4.18751123  | -2.46040962 | -0.05312171 |
| H                         | 3.57446461  | -2.22796613 | -0.93212884 |
| H                         | 4.94286084  | -3.19580892 | -0.34022304 |
| H                         | 3.54089709  | -2.90344893 | 0.70981209  |
| N                         | 3.66296758  | 0.25625208  | 0.35878468  |
| Br                        | 6.83676425  | -2.35981335 | 1.86126456  |
| C                         | 4.27169862  | 1.52650099  | -0.02394009 |
| H                         | 3.97815166  | 1.78957850  | -1.04356849 |
| H                         | 3.91982630  | 2.31525805  | 0.65661340  |
| H                         | 5.36949443  | 1.48038120  | 0.03669221  |
| <b>Zr-Int<sub>2</sub></b> |             |             |             |
| O                         | -2.80156500 | 2.09701500  | -1.78553400 |
| O                         | -2.81154800 | -0.80853000 | 1.21125600  |
| O                         | -2.80360200 | 2.15180600  | 1.15682300  |
| O                         | -2.80142400 | -0.84384200 | -1.74768300 |
| O                         | -0.53614900 | -0.85819100 | -1.77171600 |
| O                         | -0.53941500 | 2.18651800  | 1.15813200  |
| O                         | -0.54782600 | -0.80868200 | 1.22158100  |
| O                         | -0.53766400 | 2.11152100  | -1.79693000 |
| C                         | -1.67567900 | 2.52297400  | -2.22518700 |
| C                         | -1.67946700 | -1.22257400 | 1.64507100  |
| C                         | -1.67551000 | 2.59606800  | 1.57210200  |
| C                         | -1.67349100 | -1.28095200 | -2.16981300 |
| H                         | -1.68474700 | 3.28298200  | -3.01593400 |

|                           |             |             |             |
|---------------------------|-------------|-------------|-------------|
| H                         | -1.68507300 | -2.07838400 | -2.92167400 |
| H                         | -1.68530000 | 3.37727200  | 2.34068900  |
| H                         | -1.68543000 | -1.98401100 | 2.43517700  |
| Zr                        | -3.27652200 | 0.64561100  | -0.28792200 |
| Zr                        | -0.05096700 | 0.66195800  | -0.29650100 |
| C                         | 2.79484400  | -0.54682800 | 0.79723700  |
| C                         | 3.39475000  | -1.70973100 | -0.00757100 |
| H                         | 2.11051600  | -0.95916100 | 1.54879500  |
| H                         | 3.60395200  | -0.02261800 | 1.33438300  |
| H                         | 4.04126400  | -1.34745200 | -0.80746100 |
| C                         | 2.39642100  | -2.73483400 | -0.50417800 |
| H                         | 1.66364700  | -2.22807100 | -1.14418900 |
| H                         | 2.88547900  | -3.52562200 | -1.08266900 |
| H                         | 1.85371200  | -3.19049500 | 0.33115600  |
| N                         | 2.07316500  | 0.36444700  | -0.07171100 |
| Br                        | 4.79829200  | -2.70378500 | 1.20179000  |
| C                         | 2.93907600  | 1.30720400  | -0.76804200 |
| H                         | 2.33676300  | 2.02118100  | -1.34895500 |
| H                         | 3.55749700  | 1.89710600  | -0.06395400 |
| H                         | 3.63132800  | 0.82975100  | -1.48571900 |
| <b>Zr-Int<sub>3</sub></b> |             |             |             |
| O                         | -2.82896900 | 2.13749800  | -1.85372800 |
| O                         | -2.85525700 | -0.76919000 | 1.14318000  |
| O                         | -2.84199800 | 2.19732200  | 1.08665300  |
| O                         | -2.82583100 | -0.79610500 | -1.81654000 |
| O                         | -0.56040800 | -0.81359800 | -1.84798100 |
| O                         | -0.57805700 | 2.23463000  | 1.08363900  |
| O                         | -0.59199400 | -0.76634600 | 1.15168200  |
| O                         | -0.56517000 | 2.15622500  | -1.87043400 |

|    |             |             |             |
|----|-------------|-------------|-------------|
| C  | -1.70484500 | 2.56589400  | -2.29635700 |
| C  | -1.72165400 | -1.18075500 | 1.57499500  |
| C  | -1.71329200 | 2.64202400  | 1.49984000  |
| C  | -1.70035500 | -1.23596100 | -2.24273200 |
| H  | -1.72010100 | 3.32592300  | -3.08629100 |
| H  | -1.72042700 | -2.03544300 | -2.99203100 |
| H  | -1.72065400 | 3.42021300  | 2.27033200  |
| H  | -1.72078400 | -1.94107000 | 2.36482000  |
| Zr | -3.30545500 | 0.68857000  | -0.35738900 |
| Zr | -0.08830500 | 0.70674100  | -0.36681200 |
| C  | 2.62500300  | -0.46330600 | 1.02919700  |
| C  | 3.25617400  | -1.71087300 | 0.39441200  |
| H  | 1.86303800  | -0.78808400 | 1.74698900  |
| H  | 3.39891600  | 0.08867500  | 1.58941800  |
| H  | 4.01003700  | -1.44939300 | -0.34855300 |
| C  | 2.27285100  | -2.73678600 | -0.13013000 |
| H  | 1.64548800  | -2.26091600 | -0.89355700 |
| H  | 2.78631700  | -3.59280600 | -0.57895800 |
| H  | 1.61389700  | -3.09193500 | 0.66901200  |
| N  | 2.01319800  | 0.38378100  | 0.01877400  |
| Br | 4.44924600  | -2.64952900 | 1.85038800  |
| C  | 3.31432000  | -0.23436800 | -3.97943400 |
| O  | 3.76425700  | -1.20714200 | -3.51141700 |
| O  | 2.88395100  | 0.73668200  | -4.46678700 |
| C  | 2.95701200  | 1.28481100  | -0.62561800 |
| H  | 3.73670500  | 0.76544800  | -1.21536700 |
| H  | 2.43221400  | 1.95554600  | -1.32271000 |
| H  | 3.48675100  | 1.92449200  | 0.10515600  |

**Zr-Ts<sub>2</sub>**

|    |             |             |             |
|----|-------------|-------------|-------------|
| O  | -1.12153100 | 1.44627200  | -1.49767400 |
| O  | -1.12192400 | -1.44617100 | 1.49752300  |
| O  | -1.12291800 | 1.49850200  | 1.44620900  |
| O  | -1.12278300 | -1.49841600 | -1.44641900 |
| O  | 1.12155800  | -1.49799100 | -1.44569100 |
| O  | 1.12142400  | 1.49788600  | 1.44585600  |
| O  | 1.12243100  | -1.44656300 | 1.49813400  |
| O  | 1.12282200  | 1.44649900  | -1.49791400 |
| C  | 0.00062900  | 1.87415000  | -1.94001800 |
| C  | 0.00013600  | -1.87407500 | 1.94010600  |
| C  | -0.00054000 | 1.94128000  | 1.87286300  |
| C  | -0.00037200 | -1.94125100 | -1.87292700 |
| H  | 0.00034700  | 2.63356300  | -2.72548400 |
| H  | 0.00002100  | -2.72780300 | -2.63122400 |
| H  | -0.00020600 | 2.72785300  | 2.63113900  |
| H  | -0.00033600 | -2.63343000 | 2.72562700  |
| Zr | -1.54114400 | 0.00004800  | -0.00013400 |
| Zr | 1.54135500  | -0.00007200 | 0.00012400  |
| C  | 4.55048544  | -0.48629908 | 1.48888067  |
| C  | 4.93430574  | -1.91317523 | 1.08573981  |
| H  | 3.87754280  | -0.52621210 | 2.35877201  |
| H  | 5.45936301  | 0.04543789  | 1.80375858  |
| H  | 5.71031354  | -1.91322115 | 0.32177360  |
| C  | 3.78936843  | -2.83129463 | 0.71675158  |
| H  | 3.32135999  | -2.44890773 | -0.19894435 |
| H  | 4.14712138  | -3.84489687 | 0.50989753  |
| H  | 3.03120842  | -2.86460408 | 1.50418212  |
| N  | 3.91469678  | 0.23563828  | 0.38056537  |
| Br | 5.95153685  | -2.72793022 | 2.70467337  |

|   |            |             |             |
|---|------------|-------------|-------------|
| C | 4.46695335 | 0.30624093  | -1.58337537 |
| O | 5.27262046 | 1.18845677  | -1.56183450 |
| O | 3.98210932 | -0.67861968 | -2.05241241 |
| C | 3.98822903 | 1.66815561  | 0.70210404  |
| H | 5.00916351 | 1.94596668  | 0.86152109  |
| H | 3.58643670 | 2.23709658  | -0.11015768 |
| H | 3.42261030 | 1.86411982  | 1.58899382  |

**Zr-Int<sub>4</sub>**

|    |             |             |             |
|----|-------------|-------------|-------------|
| O  | 1.58424600  | -1.05786800 | -1.68630900 |
| O  | 1.53561600  | 0.70052500  | 2.11730200  |
| O  | 1.22289700  | 1.70945500  | -0.67070500 |
| O  | 1.88978300  | -2.04724300 | 1.07947200  |
| O  | 4.12093500  | -1.71065900 | 0.97004800  |
| O  | 3.45836500  | 2.03209600  | -0.77487700 |
| O  | 3.76724900  | 1.04234600  | 1.99519200  |
| O  | 3.81664200  | -0.71546400 | -1.80205000 |
| C  | 2.70838200  | -1.13394600 | -2.29094900 |
| C  | 2.64023400  | 1.11978100  | 2.60120500  |
| C  | 2.24983700  | 2.40824700  | -0.96906700 |
| C  | 3.09621800  | -2.41813900 | 1.27247600  |
| H  | 2.72853200  | -1.58121300 | -3.29213000 |
| H  | 3.26121400  | -3.40311200 | 1.72285400  |
| H  | 2.08714800  | 3.39584200  | -1.41600400 |
| H  | 2.61998900  | 1.57421200  | 3.59897600  |
| Zr | 1.08041700  | -0.24937300 | 0.24029200  |
| Zr | 4.23637000  | 0.22960800  | 0.07229900  |
| C  | -4.47171400 | 0.76211100  | 0.11060100  |
| C  | -5.24814400 | -0.24933500 | -0.74004200 |
| H  | -4.81115900 | 1.77768300  | -0.12262300 |



|                          |             |             |             |
|--------------------------|-------------|-------------|-------------|
| H                        | -4.67069100 | 0.56122800  | 1.16734600  |
| H                        | -5.03300700 | -1.26020200 | -0.39659800 |
| C                        | -5.09549100 | -0.10450500 | -2.24212300 |
| H                        | -4.03987300 | -0.25337200 | -2.50220300 |
| H                        | -5.68765400 | -0.85500500 | -2.77481700 |
| H                        | -5.40312500 | 0.89018000  | -2.58485800 |
| N                        | -3.03894000 | 0.69016300  | -0.14579600 |
| Br                       | -7.25157300 | -0.03396300 | -0.26248900 |
| C                        | -2.32172000 | -0.34478200 | 0.46071800  |
| O                        | -2.92113700 | -1.21253100 | 1.10142100  |
| O                        | -1.02353900 | -0.30855200 | 0.27271200  |
| C                        | -2.41318800 | 1.80030700  | -0.85014900 |
| H                        | -1.34234600 | 1.62867500  | -0.93367100 |
| H                        | -2.83149200 | 1.90845500  | -1.86017700 |
| H                        | -2.57063100 | 2.74710100  | -0.31225200 |
| <b>Zr-Ts<sub>3</sub></b> |             |             |             |
| O                        | 1.62174100  | -1.06742000 | -1.81346900 |
| O                        | 1.57492800  | 0.68065100  | 1.98900300  |
| O                        | 1.25908500  | 1.70363600  | -0.78235100 |
| O                        | 1.92115500  | -2.06047700 | 0.95419200  |
| O                        | 4.15137000  | -1.73434500 | 0.81743500  |
| O                        | 3.49424800  | 2.01591500  | -0.91136700 |
| O                        | 3.80485800  | 1.01230500  | 1.85795400  |
| O                        | 3.85070700  | -0.73260200 | -1.94602400 |
| C                        | 2.74271900  | -1.14821000 | -2.42486300 |
| C                        | 2.67918600  | 1.09939400  | 2.47257300  |
| C                        | 2.28563100  | 2.39660800  | -1.09490500 |
| C                        | 3.12869100  | -2.43720900 | 1.13670200  |
| H                        | 2.76267700  | -1.59439100 | -3.41887000 |

|                           |             |             |             |
|---------------------------|-------------|-------------|-------------|
| H                         | 3.29535900  | -3.41629000 | 1.59611400  |
| H                         | 2.12129300  | 3.38266400  | -1.54274400 |
| H                         | 2.65413400  | 1.56103400  | 3.47223600  |
| Zr                        | 1.12947900  | -0.26129300 | 0.11648300  |
| Zr                        | 4.26386200  | 0.20557300  | -0.07516900 |
| C                         | -4.43862900 | 0.79534200  | -0.00196700 |
| C                         | -4.90215800 | -0.64938700 | 0.02400100  |
| H                         | -4.96901900 | 1.34513300  | -0.78370100 |
| H                         | -4.66332100 | 1.27915800  | 0.95757800  |
| H                         | -5.15737600 | -1.10334500 | 0.96504500  |
| C                         | -5.08976700 | -1.41237000 | -1.26196200 |
| H                         | -4.11933500 | -1.76155800 | -1.63346600 |
| H                         | -5.73514400 | -2.27768900 | -1.10521300 |
| H                         | -5.55001800 | -0.77541000 | -2.02265100 |
| N                         | -2.99960000 | 0.84622200  | -0.27505100 |
| Br                        | -7.42818000 | 0.08348700  | 0.26084100  |
| C                         | -2.31191800 | -0.27155500 | 0.10985300  |
| O                         | -3.01627500 | -1.27635200 | 0.42255400  |
| O                         | -1.02435900 | -0.26771600 | 0.11233400  |
| C                         | -2.39099800 | 2.14491500  | -0.50116500 |
| H                         | -1.32080900 | 2.02389500  | -0.67414300 |
| H                         | -2.84627200 | 2.61672700  | -1.38173800 |
| H                         | -2.53852000 | 2.80932100  | 0.36319700  |
| <b>Zr-Int<sub>5</sub></b> |             |             |             |
| O                         | -1.36694800 | 0.52630800  | -1.85253200 |
| O                         | -1.87721400 | -0.04274300 | 2.26078000  |
| O                         | -1.09878400 | -1.79375100 | -0.00718800 |
| O                         | -2.13687200 | 2.24377100  | 0.43100100  |
| O                         | -4.30556400 | 1.72833600  | 0.08824000  |

|    |             |             |             |
|----|-------------|-------------|-------------|
| O  | -3.27331400 | -2.30145900 | -0.34153600 |
| O  | -4.04483700 | -0.56721400 | 1.92630900  |
| O  | -3.53581900 | 0.00063500  | -2.18608200 |
| C  | -2.37748000 | 0.34305300  | -2.61143800 |
| C  | -3.03216000 | -0.38744300 | 2.68927300  |
| C  | -2.03988800 | -2.62616400 | -0.23695700 |
| C  | -3.36886300 | 2.57005900  | 0.32088600  |
| H  | -2.24608900 | 0.48396500  | -3.68923100 |
| H  | -3.63167700 | 3.62592700  | 0.42918500  |
| H  | -1.77413200 | -3.68122200 | -0.35295000 |
| H  | -3.15986900 | -0.53953000 | 3.76551900  |
| Zr | -1.18022100 | 0.34750500  | 0.28247100  |
| Zr | -4.20822900 | -0.38702300 | -0.19647100 |
| C  | 4.30354800  | -0.22597500 | -0.80183900 |
| C  | 4.45714000  | 1.10691300  | -0.05413800 |
| H  | 4.40786400  | -0.11520000 | -1.89126800 |
| H  | 5.04300700  | -0.94786900 | -0.44165100 |
| H  | 4.93184700  | 0.93510000  | 0.91483500  |
| C  | 5.15570200  | 2.21601900  | -0.80439400 |
| H  | 4.68034400  | 2.40157800  | -1.77559100 |
| H  | 5.14696600  | 3.14312300  | -0.22068800 |
| H  | 6.19510900  | 1.90252900  | -0.95095800 |
| N  | 2.92055400  | -0.59309200 | -0.47001000 |
| Br | 7.52268600  | -0.53594500 | 0.39115900  |
| C  | 2.25993700  | 0.44988600  | 0.03998400  |
| O  | 3.04657900  | 1.50332200  | 0.23033200  |
| O  | 1.03638200  | 0.49569400  | 0.33278900  |
| C  | 2.32775300  | -1.86257100 | -0.84851500 |
| H  | 1.29804300  | -1.91282700 | -0.49053100 |

|                           |             |             |             |
|---------------------------|-------------|-------------|-------------|
| H                         | 2.33459700  | -1.97164700 | -1.94107100 |
| H                         | 2.91111600  | -2.67934300 | -0.41016800 |
| <b>Tc-HKUST-1</b>         |             |             |             |
| O                         | 2.17330300  | -0.00236300 | -1.13289500 |
| O                         | -2.17330400 | 0.00237600  | -1.13289200 |
| O                         | 0.00239000  | 2.06325700  | -1.10384300 |
| O                         | -0.00239300 | -2.06326000 | -1.10384500 |
| O                         | -0.00238800 | -2.06315400 | 1.10351100  |
| O                         | 0.00238900  | 2.06314700  | 1.10351400  |
| O                         | -2.17328100 | 0.00237000  | 1.13303700  |
| O                         | 2.17328300  | -0.00236100 | 1.13303300  |
| C                         | 2.75974500  | -0.00297200 | 0.00007000  |
| C                         | -2.75974500 | 0.00299300  | 0.00007400  |
| C                         | 0.00317600  | 2.70373800  | -0.00014300 |
| C                         | -0.00317400 | -2.70374300 | -0.00014600 |
| H                         | 3.85636300  | -0.00408100 | 0.00008500  |
| H                         | -0.00450000 | -3.79415000 | -0.00007600 |
| H                         | 0.00453300  | 3.79414400  | -0.00007000 |
| H                         | -3.85636300 | 0.00413200  | 0.00009000  |
| Tc                        | -0.00000200 | -0.00000200 | -1.27358600 |
| Tc                        | 0.00000100  | -0.00000400 | 1.27368000  |
| <b>Tc-Int<sub>1</sub></b> |             |             |             |
| O                         | -1.65211600 | 0.10727400  | -2.74355300 |
| O                         | 2.57408400  | 0.09933900  | -2.72251500 |
| O                         | 0.45766300  | -1.99627800 | -2.73256000 |
| O                         | 0.46302600  | 2.20337800  | -2.74164100 |
| O                         | 0.47612900  | 2.21583400  | -0.48668900 |
| O                         | 0.46688200  | -2.02709200 | -0.47981700 |
| O                         | 2.60565100  | 0.07902200  | -0.46491700 |

|                          |             |             |             |
|--------------------------|-------------|-------------|-------------|
| O                        | -1.67130000 | 0.08528600  | -0.48806200 |
| C                        | -2.23924300 | 0.09988300  | -1.61447300 |
| C                        | 3.16607500  | 0.08785200  | -1.59675300 |
| C                        | 0.46057100  | -2.59480200 | -1.60799400 |
| C                        | 0.47073100  | 2.78916200  | -1.61020800 |
| H                        | -3.33428700 | 0.10700400  | -1.62045300 |
| H                        | 0.47364400  | 3.88326500  | -1.62039600 |
| H                        | 0.45463500  | -3.68800900 | -1.62045600 |
| H                        | 4.26257100  | 0.08824500  | -1.62039400 |
| Tc                       | 0.45946800  | 0.10498000  | -2.70416400 |
| Tc                       | 0.46285100  | 0.07895400  | -0.44287000 |
| C                        | -0.93069200 | 0.92828400  | 2.46879400  |
| C                        | -0.43121500 | -0.40308100 | 2.85416100  |
| H                        | -1.75798100 | 1.00711600  | 1.77026400  |
| H                        | -0.84673800 | 1.73247500  | 3.19532300  |
| H                        | 0.02028100  | -0.44658700 | 3.84349400  |
| C                        | -1.09195600 | -1.68415300 | 2.41782200  |
| H                        | -0.36051800 | -2.49577700 | 2.31942200  |
| H                        | -1.80975400 | -1.94628800 | 3.20338100  |
| H                        | -1.61649400 | -1.57198600 | 1.46519900  |
| N                        | 0.34155900  | 0.43860300  | 1.86760400  |
| Br                       | -2.05199600 | -0.33559400 | 5.90632800  |
| C                        | 1.55893100  | 1.05963200  | 2.41142600  |
| H                        | 2.40560100  | 0.38119600  | 2.26756700  |
| H                        | 1.75861300  | 1.99155800  | 1.87235300  |
| H                        | 1.45214800  | 1.27885600  | 3.48291800  |
| <b>Tc-Ts<sub>1</sub></b> |             |             |             |
| O                        | -2.11527600 | 0.00510200  | -1.12533500 |
| O                        | 2.11528200  | -0.00514300 | -1.12529800 |

|    |             |             |             |
|----|-------------|-------------|-------------|
| O  | -0.00520300 | -2.09582900 | -1.12284400 |
| O  | 0.00507700  | 2.09585800  | -1.12285900 |
| O  | 0.00520200  | 2.09583000  | 1.12284100  |
| O  | -0.00507800 | -2.09585800 | 1.12285600  |
| O  | 2.11527800  | -0.00510300 | 1.12533600  |
| O  | -2.11528400 | 0.00514200  | 1.12529800  |
| C  | -2.70209800 | 0.00659800  | -0.00000700 |
| C  | 2.70209800  | -0.00660100 | 0.00000800  |
| C  | -0.00666900 | -2.69074300 | 0.00000800  |
| C  | 0.00666700  | 2.69074300  | -0.00001000 |
| H  | -3.79842900 | 0.00937600  | -0.00003100 |
| H  | 0.00950200  | 3.78563700  | 0.00002600  |
| H  | -0.00950700 | -3.78563700 | -0.00003400 |
| H  | 3.79842900  | -0.00938300 | 0.00002800  |
| Tc | -0.00001500 | 0.00000200  | -1.10236400 |
| Tc | 0.00001500  | -0.00000100 | 1.10236500  |
| C  | -0.95685980 | 0.65038332  | 4.10128561  |
| C  | -0.54356407 | -0.67835488 | 4.60250436  |
| H  | -1.92203584 | 0.65857434  | 3.59292892  |
| H  | -0.85089287 | 1.48890029  | 4.79392307  |
| H  | 0.32903930  | -0.71769878 | 5.23959964  |
| C  | -1.05683870 | -1.96474869 | 4.01490075  |
| H  | -0.38906970 | -2.32685120 | 3.22403034  |
| H  | -1.11250474 | -2.72438461 | 4.79825692  |
| H  | -2.05467112 | -1.82988277 | 3.58757964  |
| N  | 0.16304345  | 0.41914287  | 3.20619050  |
| Br | -1.83927594 | -0.71211674 | 6.93247527  |
| C  | 1.36691210  | 1.16819703  | 3.55286349  |
| H  | 2.23366443  | 0.73981438  | 3.04271609  |

|                           |             |             |             |
|---------------------------|-------------|-------------|-------------|
| H                         | 1.24919423  | 2.21190881  | 3.22742053  |
| H                         | 1.54556185  | 1.16149402  | 4.63868037  |
| <b>Tc-Int<sub>2</sub></b> |             |             |             |
| O                         | -1.65439000 | 0.10918200  | -2.72319600 |
| O                         | 2.57921100  | 0.09881100  | -2.71760300 |
| O                         | 0.46016100  | -2.00943500 | -2.73375000 |
| O                         | 0.46244200  | 2.21579100  | -2.74738700 |
| O                         | 0.48943300  | 2.23603800  | -0.48170200 |
| O                         | 0.45407200  | -2.04573800 | -0.46973700 |
| O                         | 2.62457400  | 0.08589900  | -0.45156600 |
| O                         | -1.69324500 | 0.07966600  | -0.45755000 |
| C                         | -2.23937100 | 0.09779700  | -1.59285600 |
| C                         | 3.16724600  | 0.09112600  | -1.58893500 |
| C                         | 0.45566800  | -2.59591800 | -1.60473300 |
| C                         | 0.47635200  | 2.79093400  | -1.61012400 |
| H                         | -3.33428700 | 0.10700400  | -1.62045300 |
| H                         | 0.47364400  | 3.88326500  | -1.62039600 |
| H                         | 0.45463500  | -3.68800900 | -1.62045600 |
| H                         | 4.26257100  | 0.08824500  | -1.62039400 |
| Tc                        | 0.46102500  | 0.10688500  | -2.71111800 |
| Tc                        | 0.46581500  | 0.08481100  | -0.38149300 |
| C                         | -0.76474100 | 0.20953700  | 2.51421000  |
| C                         | -0.71039100 | -1.06452700 | 3.36643400  |
| H                         | -1.65535000 | 0.17325100  | 1.87807100  |
| H                         | -0.85699300 | 1.08832500  | 3.17596600  |
| H                         | 0.21246800  | -1.11981200 | 3.94375300  |
| C                         | -1.00441900 | -2.35171800 | 2.62684100  |
| H                         | -0.29168500 | -2.44338200 | 1.79894900  |
| H                         | -0.91238500 | -3.22439900 | 3.28228900  |

|                           |             |             |             |
|---------------------------|-------------|-------------|-------------|
| H                         | -2.01332400 | -2.33378500 | 2.19980300  |
| N                         | 0.43113400  | 0.28751600  | 1.69552800  |
| Br                        | -2.12400100 | -0.90056100 | 4.94344400  |
| C                         | 1.52940900  | 0.93020500  | 2.39503500  |
| H                         | 2.42293500  | 0.93050400  | 1.76500500  |
| H                         | 1.28839500  | 1.98146900  | 2.65265500  |
| H                         | 1.79047400  | 0.42429500  | 3.34450100  |
| <b>Tc-Int<sub>3</sub></b> |             |             |             |
| O                         | -1.63657700 | 0.20734200  | -2.80345800 |
| O                         | 2.59594200  | 0.20029300  | -2.78709200 |
| O                         | 0.47848600  | -1.90952100 | -2.80264500 |
| O                         | 0.48029100  | 2.31467300  | -2.82763700 |
| O                         | 0.51021700  | 2.33240300  | -0.56212800 |
| O                         | 0.46442700  | -1.95023100 | -0.53882300 |
| O                         | 2.64477700  | 0.16715500  | -0.52113500 |
| O                         | -1.67477900 | 0.17683500  | -0.53837600 |
| C                         | -2.22135800 | 0.19517100  | -1.67340100 |
| C                         | 3.18584200  | 0.18365800  | -1.66028900 |
| C                         | 0.47133000  | -2.49934900 | -1.67576500 |
| C                         | 0.49548500  | 2.88826000  | -1.68962900 |
| H                         | -3.31583500 | 0.20400400  | -1.69733200 |
| H                         | 0.49209600  | 3.98026500  | -1.69727500 |
| H                         | 0.47308700  | -3.59100900 | -1.69733500 |
| H                         | 4.28102300  | 0.18524500  | -1.69727300 |
| Tc                        | 0.47905900  | 0.20606000  | -2.78538400 |
| Tc                        | 0.48097400  | 0.17834800  | -0.45643200 |
| C                         | -0.80829900 | 0.48058000  | 2.39229200  |
| C                         | -0.86191500 | -0.75099300 | 3.30380200  |
| H                         | -1.67949200 | 0.46677100  | 1.72965300  |



|                          |             |             |             |
|--------------------------|-------------|-------------|-------------|
| H                        | -0.86544000 | 1.39451100  | 3.00771800  |
| H                        | 0.03169700  | -0.83282800 | 3.92263800  |
| C                        | -1.20467000 | -2.05155100 | 2.60812200  |
| H                        | -0.46984300 | -2.22245800 | 1.81205500  |
| H                        | -1.19227600 | -2.89783400 | 3.30199200  |
| H                        | -2.19424200 | -1.99298800 | 2.13997600  |
| N                        | 0.41732800  | 0.44421000  | 1.61312300  |
| Br                       | -2.33428900 | -0.42964300 | 4.79726100  |
| C                        | 3.00059800  | -2.76791500 | 2.14022300  |
| O                        | 2.82208100  | -2.11207500 | 3.09123100  |
| O                        | 3.20581800  | -3.45357100 | 1.21444900  |
| C                        | 1.51266900  | 1.10453700  | 2.30297700  |
| H                        | 1.71438700  | 0.66923600  | 3.29805000  |
| H                        | 2.42933200  | 1.02337200  | 1.71224200  |
| H                        | 1.30196600  | 2.18086300  | 2.46075700  |
| <b>Tc-Ts<sub>2</sub></b> |             |             |             |
| O                        | -2.11527600 | 0.00510200  | -1.12533500 |
| O                        | 2.11528200  | -0.00514300 | -1.12529800 |
| O                        | -0.00520300 | -2.09582900 | -1.12284400 |
| O                        | 0.00507700  | 2.09585800  | -1.12285900 |
| O                        | 0.00520200  | 2.09583000  | 1.12284100  |
| O                        | -0.00507800 | -2.09585800 | 1.12285600  |
| O                        | 2.11527800  | -0.00510300 | 1.12533600  |
| O                        | -2.11528400 | 0.00514200  | 1.12529800  |
| C                        | -2.70209800 | 0.00659800  | -0.00000700 |
| C                        | 2.70209800  | -0.00660100 | 0.00000800  |
| C                        | -0.00666900 | -2.69074300 | 0.00000800  |
| C                        | 0.00666700  | 2.69074300  | -0.00001000 |
| H                        | -3.79842900 | 0.00937600  | -0.00003100 |

|                           |             |             |             |
|---------------------------|-------------|-------------|-------------|
| H                         | 0.00950200  | 3.78563700  | 0.00002600  |
| H                         | -0.00950700 | -3.78563700 | -0.00003400 |
| H                         | 3.79842900  | -0.00938300 | 0.00002800  |
| Tc                        | -0.00001500 | 0.00000200  | -1.10236400 |
| Tc                        | 0.00001500  | -0.00000100 | 1.10236500  |
| C                         | -1.11624117 | 0.72333640  | 4.36767259  |
| C                         | -1.69260862 | -0.61192649 | 4.84797427  |
| H                         | -1.86004694 | 1.22997700  | 3.73425008  |
| H                         | -0.94194306 | 1.36493515  | 5.24284226  |
| H                         | -1.04690944 | -1.07701711 | 5.59134210  |
| C                         | -2.09250705 | -1.59178554 | 3.76633917  |
| H                         | -1.18647094 | -1.90758671 | 3.23425002  |
| H                         | -2.55572803 | -2.48594404 | 4.19537550  |
| H                         | -2.77605586 | -1.13637004 | 3.04431374  |
| N                         | 0.14093738  | 0.53636132  | 3.63396556  |
| Br                        | -3.36804993 | -0.15263220 | 5.98879671  |
| C                         | 1.66179924  | -0.60110898 | 4.37697090  |
| O                         | 2.38164145  | 0.13872669  | 4.97891663  |
| O                         | 1.25504684  | -1.68523462 | 4.08672277  |
| C                         | 0.82020269  | 1.83970110  | 3.60560973  |
| H                         | 0.95935069  | 2.19123244  | 4.60659103  |
| H                         | 1.77231028  | 1.73538506  | 3.12863038  |
| H                         | 0.22337806  | 2.54117494  | 3.06096782  |
| <b>Tc-Int<sub>4</sub></b> |             |             |             |
| O                         | -1.68223300 | 0.49338100  | -3.41519000 |
| O                         | 2.54926300  | 0.48683500  | -3.40374900 |
| O                         | 0.42839400  | -1.61050100 | -3.42362600 |
| O                         | 0.43582900  | 2.59818200  | -3.41071200 |
| O                         | 0.44198500  | 2.62333000  | -1.15221400 |

|    |             |             |             |
|----|-------------|-------------|-------------|
| O  | 0.43091700  | -1.62987500 | -1.16647600 |
| O  | 2.57715400  | 0.49239200  | -1.14287000 |
| O  | -1.70778800 | 0.51430400  | -1.15584500 |
| C  | -2.26774400 | 0.50511800  | -2.28135500 |
| C  | 3.13508200  | 0.48812400  | -2.27150300 |
| C  | 0.42856800  | -2.19655500 | -2.28821900 |
| C  | 0.44033300  | 3.18610400  | -2.27915400 |
| H  | -3.36414000 | 0.50483700  | -2.29578600 |
| H  | 0.44379100  | 4.28109800  | -2.29572900 |
| H  | 0.42478200  | -3.29017600 | -2.29578900 |
| H  | 4.23271800  | 0.48607800  | -2.29572700 |
| Tc | 0.43233300  | 0.49027900  | -3.37369500 |
| Tc | 0.42493100  | 0.48680500  | -1.10806300 |
| C  | -1.40866700 | 0.12918500  | 4.09392700  |
| C  | -1.32019900 | -1.28079900 | 4.67539900  |
| H  | -2.35778800 | 0.15443100  | 3.53276800  |
| H  | -1.47864800 | 0.86154700  | 4.90546100  |
| H  | -0.87738900 | -1.95721600 | 3.94713900  |
| C  | -2.63558200 | -1.80356100 | 5.22103600  |
| H  | -3.34253800 | -1.89146700 | 4.38440000  |
| H  | -2.51813000 | -2.79046700 | 5.67785000  |
| H  | -3.06321500 | -1.12389600 | 5.96720200  |
| N  | -0.31952700 | 0.49491200  | 3.21375100  |
| Br | 0.07390400  | -1.31752800 | 6.21835500  |
| C  | -0.37244000 | -0.03260500 | 1.90058700  |
| O  | -1.17740400 | -0.95430900 | 1.68242400  |
| O  | 0.46103200  | 0.50604500  | 1.06807500  |
| C  | 0.45625500  | 1.68198600  | 3.52845200  |
| H  | 1.25486200  | 1.77444700  | 2.79217400  |

|                          |             |             |             |
|--------------------------|-------------|-------------|-------------|
| H                        | -0.15348900 | 2.60300000  | 3.49179200  |
| H                        | 0.89287300  | 1.59264300  | 4.53160900  |
| <b>Tc-Ts<sub>3</sub></b> |             |             |             |
| O                        | -2.11527600 | 0.00510200  | -1.12533500 |
| O                        | 2.11528200  | -0.00514300 | -1.12529800 |
| O                        | -0.00520300 | -2.09582900 | -1.12284400 |
| O                        | 0.00507700  | 2.09585800  | -1.12285900 |
| O                        | 0.00520200  | 2.09583000  | 1.12284100  |
| O                        | -0.00507800 | -2.09585800 | 1.12285600  |
| O                        | 2.11527800  | -0.00510300 | 1.12533600  |
| O                        | -2.11528400 | 0.00514200  | 1.12529800  |
| C                        | -2.70209800 | 0.00659800  | -0.00000700 |
| C                        | 2.70209800  | -0.00660100 | 0.00000800  |
| C                        | -0.00666900 | -2.69074300 | 0.00000800  |
| C                        | 0.00666700  | 2.69074300  | -0.00001000 |
| H                        | -3.79842900 | 0.00937600  | -0.00003100 |
| H                        | 0.00950200  | 3.78563700  | 0.00002600  |
| H                        | -0.00950700 | -3.78563700 | -0.00003400 |
| H                        | 3.79842900  | -0.00938300 | 0.00002800  |
| Tc                       | -0.00001500 | 0.00000200  | -1.10236400 |
| Tc                       | 0.00001500  | -0.00000100 | 1.10236500  |
| C                        | -0.23087506 | -0.69506604 | 6.75262269  |
| C                        | -0.75604741 | -2.07798365 | 6.41928075  |
| H                        | -1.08881658 | -0.03106332 | 6.96873109  |
| H                        | 0.39189359  | -0.73320759 | 7.64663679  |
| H                        | -0.06974699 | -2.78357914 | 5.98188742  |
| C                        | -2.22249915 | -2.40196431 | 6.50407852  |
| H                        | -2.73235775 | -1.94698680 | 5.64754680  |
| H                        | -2.38494082 | -3.48153409 | 6.48827003  |

|                           |             |             |             |
|---------------------------|-------------|-------------|-------------|
| H                         | -2.65347250 | -2.00412046 | 7.42783251  |
| N                         | 0.56811580  | -0.18133183 | 5.64969323  |
| Br                        | -0.13007049 | -3.27251372 | 8.61962273  |
| C                         | 0.02542013  | -0.44934372 | 4.39046296  |
| O                         | -0.86367714 | -1.35689730 | 4.38953552  |
| O                         | 0.46364400  | 0.19698455  | 3.39306302  |
| C                         | 1.36138651  | 1.00805415  | 5.88440009  |
| H                         | 1.87826289  | 1.26505154  | 4.95878689  |
| H                         | 0.74064226  | 1.87033644  | 6.18721092  |
| H                         | 2.09747554  | 0.81761350  | 6.67568934  |
| <b>Tc-Int<sub>5</sub></b> |             |             |             |
| O                         | -1.67890600 | 0.49871700  | -3.41130300 |
| O                         | 2.54694300  | 0.49007700  | -3.41013100 |
| O                         | 0.42891200  | -1.60440500 | -3.41772000 |
| O                         | 0.43806100  | 2.59650200  | -3.41470100 |
| O                         | 0.44582000  | 2.61433800  | -1.16079500 |
| O                         | 0.43002600  | -1.62090800 | -1.16547200 |
| O                         | 2.56746700  | 0.49507200  | -1.15445000 |
| O                         | -1.69825800 | 0.49588300  | -1.15605100 |
| C                         | -2.26760000 | 0.50006400  | -2.28218100 |
| C                         | 3.13581800  | 0.48977400  | -2.28099500 |
| C                         | 0.42866900  | -2.19624300 | -2.28787900 |
| C                         | 0.44227500  | 3.18665900  | -2.28553600 |
| H                         | -3.36414000 | 0.50483700  | -2.29578600 |
| H                         | 0.44379100  | 4.28109800  | -2.29572900 |
| H                         | 0.42478200  | -3.29017600 | -2.29578900 |
| H                         | 4.23271800  | 0.48607800  | -2.29572700 |
| Tc                        | 0.43373500  | 0.49352900  | -3.37697900 |
| Tc                        | 0.43452800  | 0.48983900  | -1.13842500 |

|    |             |             |            |
|----|-------------|-------------|------------|
| C  | -1.24870400 | -0.24213500 | 4.12433500 |
| C  | -1.21648500 | -1.55660000 | 3.33317200 |
| H  | -2.25336800 | 0.20969100  | 4.14378300 |
| H  | -0.91208900 | -0.40713100 | 5.15195400 |
| H  | -0.45252000 | -2.21782700 | 3.75124400 |
| C  | -2.53349800 | -2.28557000 | 3.19809000 |
| H  | -3.30407300 | -1.63512600 | 2.76519700 |
| H  | -2.41955800 | -3.17040400 | 2.56179100 |
| H  | -2.83401000 | -2.60610700 | 4.20178500 |
| N  | -0.33860000 | 0.58696600  | 3.33018200 |
| Br | -1.29499100 | -2.47172100 | 6.81478700 |
| C  | -0.17055600 | 0.07176200  | 2.09308400 |
| O  | -0.72853800 | -1.14008900 | 1.99500100 |
| O  | 0.43408500  | 0.62364700  | 1.15585800 |
| C  | 0.02221100  | 1.93945300  | 3.69145400 |
| H  | 0.68056600  | 2.34389500  | 2.92045200 |
| H  | -0.87214900 | 2.57492800  | 3.77097400 |
| H  | 0.53837300  | 1.94281100  | 4.65808600 |

**Ag-HKUST-1**

|   |             |             |             |
|---|-------------|-------------|-------------|
| O | -1.51903400 | -1.51528500 | 1.24615200  |
| O | 1.51929700  | 1.51759900  | 1.24275900  |
| O | -1.51625800 | 1.52030300  | 1.24323100  |
| O | 1.51661700  | -1.51801200 | 1.24581100  |
| O | 1.61209900  | -1.61657900 | -1.05107800 |
| O | -1.61244500 | 1.61425900  | -1.05366100 |
| O | 1.61529200  | 1.61109400  | -1.05413200 |
| O | -1.61553900 | -1.61342700 | -1.05073900 |
| C | -1.93305100 | -1.92921000 | 0.11011900  |
| C | 1.93287000  | 1.92938900  | 0.10590900  |

|                           |             |             |             |
|---------------------------|-------------|-------------|-------------|
| C                         | -1.92932200 | 1.93292700  | 0.10648300  |
| C                         | 1.92935800  | -1.93291400 | 0.10968300  |
| H                         | -2.71552900 | -2.71084400 | 0.21903500  |
| H                         | 2.71059800  | -2.71578600 | 0.21840100  |
| H                         | -2.71064700 | 2.71571300  | 0.21386900  |
| H                         | 2.71585700  | 2.71051400  | 0.21307300  |
| Ag                        | 0.00019400  | 0.00135900  | 1.31276900  |
| Ag                        | -0.00018700 | -0.00136600 | -1.48086000 |
| <b>Ag-Int<sub>0</sub></b> |             |             |             |
| O                         | -1.27675600 | -2.11527500 | -0.09318300 |
| O                         | -1.28645000 | 2.10910500  | 0.10193000  |
| O                         | -1.28911400 | 0.09443100  | -2.10776600 |
| O                         | -1.27386600 | -0.10060800 | 2.11659200  |
| O                         | 1.01114000  | -0.10243500 | 2.29109100  |
| O                         | 0.99462400  | 0.10669600  | -2.29774800 |
| O                         | 0.99749200  | 2.29716200  | 0.10104800  |
| O                         | 1.00803500  | -2.29204100 | -0.10807900 |
| C                         | -0.15182900 | -2.72922500 | -0.12469100 |
| C                         | -0.16438300 | 2.72861600  | 0.12560500  |
| C                         | -0.16772600 | 0.12452000  | -2.72823500 |
| C                         | -0.14818000 | -0.12574400 | 2.72942300  |
| H                         | -0.29125600 | -3.82521800 | -0.17458700 |
| H                         | -0.28623600 | -0.17655400 | 3.82554900  |
| H                         | -0.31342800 | 0.17433000  | -3.82341800 |
| H                         | -0.30886900 | 3.82391500  | 0.17633400  |
| Ag                        | -1.28000800 | -0.00305800 | 0.00437900  |
| Ag                        | 1.57600100  | 0.00387200  | -0.00539200 |
| C                         | 4.01542739  | 0.61015189  | 1.29633390  |
| C                         | 4.39402953  | -0.79039163 | 0.93664076  |

|                           |             |             |             |
|---------------------------|-------------|-------------|-------------|
| H                         | 3.27248592  | 0.79715076  | 2.07019874  |
| H                         | 4.77909319  | 1.38444793  | 1.19888749  |
| H                         | 5.42063822  | -0.91297161 | 0.57811443  |
| C                         | 3.81380724  | -2.00079425 | 1.63201430  |
| H                         | 3.78474175  | -2.86515104 | 0.95633968  |
| H                         | 4.41714818  | -2.27333149 | 2.50744003  |
| H                         | 2.79029434  | -1.79835197 | 1.96481641  |
| N                         | 3.51190257  | -0.01129011 | 0.06998061  |
| C                         | 4.07526389  | 0.47622203  | -1.18351396 |
| H                         | 3.97184795  | -0.29933373 | -1.95092411 |
| H                         | 3.51621992  | 1.36049782  | -1.51009363 |
| H                         | 5.14404472  | 0.75003706  | -1.10667951 |
| <b>Ag-Int<sub>1</sub></b> |             |             |             |
| O                         | -2.81585500 | -2.58170200 | -0.77641400 |
| O                         | -2.91887300 | 1.70212600  | -0.13168700 |
| O                         | -2.82304900 | -0.15412200 | -2.59604200 |
| O                         | -2.81844500 | -0.77380400 | 1.67860700  |
| O                         | -0.58931400 | -0.27223800 | 1.80752000  |
| O                         | -0.61249900 | -0.75079100 | -2.76133900 |
| O                         | -0.81703600 | 1.77501200  | -0.99352100 |
| O                         | -0.60170000 | -2.77163200 | -0.23232200 |
| C                         | -1.72772100 | -3.19668900 | -0.54423300 |
| C                         | -1.82523200 | 2.27575300  | -0.48652400 |
| C                         | -1.72476700 | -0.40575400 | -3.19333800 |
| C                         | -1.70840000 | -0.55383400 | 2.26810200  |
| H                         | -1.80806300 | -4.28732000 | -0.63608900 |
| H                         | -1.80304300 | -0.63865600 | 3.36404700  |
| H                         | -1.83023500 | -0.28777200 | -4.28492000 |
| H                         | -1.82567600 | 3.36181300  | -0.28516800 |



|                          |             |             |             |
|--------------------------|-------------|-------------|-------------|
| Ag                       | -2.81541400 | -0.43205900 | -0.45786800 |
| Ag                       | 0.23177900  | -0.66603000 | -0.46567100 |
| C                        | 2.28454000  | 1.51747900  | 0.72040600  |
| C                        | 3.31144400  | 0.47720900  | 0.43999600  |
| H                        | 1.59831900  | 1.34863900  | 1.54518600  |
| H                        | 2.51318500  | 2.55867700  | 0.50640000  |
| H                        | 4.21855200  | 0.82633900  | -0.04751100 |
| C                        | 3.47574200  | -0.75361100 | 1.31177600  |
| H                        | 3.09198100  | -1.64968000 | 0.80525000  |
| H                        | 4.53498400  | -0.89891600 | 1.54074500  |
| H                        | 2.94795000  | -0.64039000 | 2.26320700  |
| N                        | 2.10676700  | 0.62737000  | -0.43538600 |
| Br                       | 5.06737400  | 2.01475300  | 2.34941000  |
| C                        | 2.31988800  | 1.25834700  | -1.74393700 |
| H                        | 2.52365500  | 0.48554100  | -2.49280400 |
| H                        | 1.40743400  | 1.79468600  | -2.01749500 |
| H                        | 3.16543900  | 1.96376800  | -1.71754800 |
| <b>Ag-Ts<sub>1</sub></b> |             |             |             |
| O                        | -1.27675600 | -2.11527500 | -0.09318300 |
| O                        | -1.28645000 | 2.10910500  | 0.10193000  |
| O                        | -1.28911400 | 0.09443100  | -2.10776600 |
| O                        | -1.27386600 | -0.10060800 | 2.11659200  |
| O                        | 1.01114000  | -0.10243500 | 2.29109100  |
| O                        | 0.99462400  | 0.10669600  | -2.29774800 |
| O                        | 0.99749200  | 2.29716200  | 0.10104800  |
| O                        | 1.00803500  | -2.29204100 | -0.10807900 |
| C                        | -0.15182900 | -2.72922500 | -0.12469100 |
| C                        | -0.16438300 | 2.72861600  | 0.12560500  |
| C                        | -0.16772600 | 0.12452000  | -2.72823500 |

|                           |             |             |             |
|---------------------------|-------------|-------------|-------------|
| C                         | -0.14818000 | -0.12574400 | 2.72942300  |
| H                         | -0.29125600 | -3.82521800 | -0.17458700 |
| H                         | -0.28623600 | -0.17655400 | 3.82554900  |
| H                         | -0.31342800 | 0.17433000  | -3.82341800 |
| H                         | -0.30886900 | 3.82391500  | 0.17633400  |
| Ag                        | -1.28000800 | -0.00305800 | 0.00437900  |
| Ag                        | 1.57600100  | 0.00387200  | -0.00539200 |
| C                         | 4.67954068  | 0.64920025  | 0.72249707  |
| C                         | 5.17206577  | -0.67210285 | 0.27622812  |
| H                         | 4.20507961  | 0.64354737  | 1.70479699  |
| H                         | 5.36426605  | 1.49231238  | 0.60249931  |
| H                         | 5.77855142  | -0.69805195 | -0.61840967 |
| C                         | 4.60852307  | -1.96732002 | 0.79427250  |
| H                         | 3.79651920  | -2.32545528 | 0.15014633  |
| H                         | 5.39677160  | -2.72368139 | 0.81361344  |
| H                         | 4.21561197  | -1.84629177 | 1.80789704  |
| N                         | 3.74703563  | 0.42671138  | -0.36827501 |
| Br                        | 7.54588391  | -0.70957681 | 1.48963518  |
| C                         | 4.04817266  | 1.19155289  | -1.57446653 |
| H                         | 3.51008745  | 0.77086515  | -2.42799322 |
| H                         | 3.72230886  | 2.23219126  | -1.43308247 |
| H                         | 5.12712713  | 1.19230784  | -1.79083576 |
| <b>Ag-Int<sub>2</sub></b> |             |             |             |
| O                         | -2.89900900 | -2.63638000 | -0.80533400 |
| O                         | -3.02266800 | 1.77201100  | -0.15711500 |
| O                         | -2.88081600 | -0.18224000 | -2.64104400 |
| O                         | -2.84092800 | -0.79771200 | 1.70700400  |
| O                         | -0.60695600 | -0.28352500 | 1.79499200  |
| O                         | -0.65191400 | -0.74758400 | -2.74035500 |

|                           |             |             |             |
|---------------------------|-------------|-------------|-------------|
| O                         | -0.92334700 | 1.73988500  | -1.02487700 |
| O                         | -0.69255000 | -2.72393700 | -0.20453300 |
| C                         | -1.80284200 | -3.19648900 | -0.54790200 |
| C                         | -1.90585900 | 2.28682700  | -0.50054600 |
| C                         | -1.76837900 | -0.41197600 | -3.19494300 |
| C                         | -1.73214300 | -0.56795800 | 2.26851000  |
| H                         | -1.80806300 | -4.28732000 | -0.63608900 |
| H                         | -1.80304300 | -0.63865600 | 3.36404700  |
| H                         | -1.83023500 | -0.28777200 | -4.28492000 |
| H                         | -1.82567600 | 3.36181300  | -0.28516800 |
| Ag                        | -2.92867300 | -0.42281500 | -0.45971200 |
| Ag                        | 0.11951500  | -0.67491100 | -0.45984800 |
| C                         | 2.34474500  | 1.26565600  | 0.51093600  |
| C                         | 3.72807600  | 0.70997200  | 0.90478800  |
| H                         | 1.65155800  | 1.11590400  | 1.34860800  |
| H                         | 2.41669500  | 2.34459900  | 0.30878900  |
| H                         | 4.42283600  | 0.78328700  | 0.06735900  |
| C                         | 3.70826700  | -0.67829200 | 1.51267700  |
| H                         | 3.26566700  | -1.36665500 | 0.78322400  |
| H                         | 4.71800500  | -1.02241100 | 1.75815300  |
| H                         | 3.09428600  | -0.70128200 | 2.41912900  |
| N                         | 1.91564400  | 0.50492000  | -0.64261300 |
| Br                        | 4.61178200  | 2.01067100  | 2.28139600  |
| C                         | 2.03045100  | 1.23924100  | -1.87893200 |
| H                         | 1.87076300  | 0.57391200  | -2.73189800 |
| H                         | 1.27278300  | 2.04308600  | -1.92464400 |
| H                         | 3.02570200  | 1.71486800  | -1.96878600 |
| <b>Ag-Int<sub>3</sub></b> |             |             |             |
| O                         | -3.58407900 | 0.29875000  | -1.56089100 |

|    |             |             |             |
|----|-------------|-------------|-------------|
| O  | -0.53166600 | -2.08423100 | 0.68684500  |
| O  | -3.12443400 | -0.37406000 | 1.58041000  |
| O  | -1.19545800 | -1.57993300 | -2.35490700 |
| O  | 0.60793900  | -0.30035500 | -1.72898900 |
| O  | -1.41591100 | 1.14218400  | 1.84945800  |
| O  | -0.62047200 | -4.08236200 | 1.79730400  |
| O  | -1.76549800 | 1.63007600  | -1.16072000 |
| C  | -2.90380200 | 1.33464700  | -1.65215300 |
| C  | -0.12238500 | -2.99014000 | 1.49319300  |
| C  | -2.52056900 | 0.55969500  | 2.12848000  |
| C  | -0.04579800 | -1.12847900 | -2.45350600 |
| H  | -3.31068300 | 2.16986000  | -2.25087500 |
| H  | 0.53812300  | -1.48907100 | -3.30561400 |
| H  | -3.00120500 | 0.97660700  | 3.02083700  |
| H  | 0.84757600  | -2.68307100 | 1.96689000  |
| Ag | -2.47087800 | -1.47258200 | -0.38650600 |
| Ag | -0.28776700 | 0.56108900  | 0.05915900  |
| C  | 2.62249600  | -0.29178100 | 0.51117600  |
| C  | 3.75276500  | 0.70944000  | 0.19231500  |
| H  | 2.27456100  | -0.73252200 | -0.42900100 |
| H  | 2.99000600  | -1.09500800 | 1.16365500  |
| H  | 4.08782200  | 1.21577400  | 1.09898300  |
| C  | 3.43315700  | 1.68760300  | -0.92020000 |
| H  | 2.53559300  | 2.24639700  | -0.63024100 |
| H  | 4.25644600  | 2.39041500  | -1.08243000 |
| H  | 3.21474200  | 1.16258400  | -1.85500300 |
| N  | 1.55893100  | 0.48527300  | 1.12454100  |
| Br | 5.43666000  | -0.37882400 | -0.32558400 |
| C  | -1.41528300 | 4.08160200  | 0.38576600  |

|                          |             |             |             |
|--------------------------|-------------|-------------|-------------|
| O                        | -2.56662700 | 4.24822000  | 0.51145000  |
| O                        | -0.25499500 | 3.98372500  | 0.27126100  |
| C                        | 1.42817000  | 0.21185000  | 2.53728300  |
| H                        | 2.38291000  | 0.48347900  | 3.02465600  |
| H                        | 0.62492800  | 0.81064600  | 2.96736900  |
| H                        | 1.25698500  | -0.85673400 | 2.75589700  |
| <b>Ag-Ts<sub>2</sub></b> |             |             |             |
| O                        | -1.27675600 | -2.11527500 | -0.09318300 |
| O                        | -1.28645000 | 2.10910500  | 0.10193000  |
| O                        | -1.28911400 | 0.09443100  | -2.10776600 |
| O                        | -1.27386600 | -0.10060800 | 2.11659200  |
| O                        | 1.01114000  | -0.10243500 | 2.29109100  |
| O                        | 0.99462400  | 0.10669600  | -2.29774800 |
| O                        | 0.99749200  | 2.29716200  | 0.10104800  |
| O                        | 1.00803500  | -2.29204100 | -0.10807900 |
| C                        | -0.15182900 | -2.72922500 | -0.12469100 |
| C                        | -0.16438300 | 2.72861600  | 0.12560500  |
| C                        | -0.16772600 | 0.12452000  | -2.72823500 |
| C                        | -0.14818000 | -0.12574400 | 2.72942300  |
| H                        | -0.29125600 | -3.82521800 | -0.17458700 |
| H                        | -0.28623600 | -0.17655400 | 3.82554900  |
| H                        | -0.31342800 | 0.17433000  | -3.82341800 |
| H                        | -0.30886900 | 3.82391500  | 0.17633400  |
| Ag                       | -1.28000800 | -0.00305800 | 0.00437900  |
| Ag                       | 1.57600100  | 0.00387200  | -0.00539200 |
| C                        | 4.63439410  | 0.45318444  | 1.62092752  |
| C                        | 4.89574936  | -0.93404449 | 2.21515428  |
| H                        | 3.96877772  | 1.01415628  | 2.29429312  |
| H                        | 5.58687134  | 0.99958543  | 1.57419623  |

|                           |             |             |             |
|---------------------------|-------------|-------------|-------------|
| H                         | 5.66180287  | -1.46691784 | 1.65386960  |
| C                         | 3.67574179  | -1.79779505 | 2.45072485  |
| H                         | 3.23203870  | -2.04163537 | 1.47736975  |
| H                         | 3.94696664  | -2.73938777 | 2.93858295  |
| H                         | 2.92495658  | -1.27737350 | 3.05192859  |
| N                         | 4.04956290  | 0.36408882  | 0.27786459  |
| Br                        | 5.85795536  | -0.62392439 | 4.03106061  |
| C                         | 4.95052551  | -0.76422895 | -1.04496819 |
| O                         | 5.74174626  | -0.05753370 | -1.59489532 |
| O                         | 4.47350828  | -1.82846580 | -0.79026366 |
| C                         | 4.24367647  | 1.67255422  | -0.36333603 |
| H                         | 5.28546805  | 1.91658638  | -0.36764982 |
| H                         | 3.88228557  | 1.63370204  | -1.36970928 |
| H                         | 3.70456927  | 2.41979425  | 0.18062698  |
| <b>Ag-Int<sub>4</sub></b> |             |             |             |
| O                         | -3.77811600 | -1.83636500 | 0.75684000  |
| O                         | -3.73423000 | 2.35805900  | 0.47581500  |
| O                         | -3.73099700 | 0.11837400  | -1.48234900 |
| O                         | -3.76226900 | 0.37828100  | 2.70696100  |
| O                         | -1.55388800 | -0.15564000 | 2.86778900  |
| O                         | -1.60657500 | 0.93094800  | -1.69675100 |
| O                         | -1.54961900 | 2.60456600  | 1.09348900  |
| O                         | -1.68066600 | -1.96920700 | -0.11810300 |
| C                         | -2.71122200 | -2.44760800 | 0.33401100  |
| C                         | -2.67669900 | 3.01042200  | 0.79115000  |
| C                         | -2.68317900 | 0.51606000  | -2.12208000 |
| C                         | -2.66380500 | 0.09665600  | 3.32997800  |
| H                         | -2.83006300 | -3.54638100 | 0.43032900  |
| H                         | -2.82504300 | 0.10228300  | 4.43046500  |

|                          |             |             |             |
|--------------------------|-------------|-------------|-------------|
| H                        | -2.85223500 | 0.45316700  | -3.21850200 |
| H                        | -2.84767600 | 4.10275200  | 0.78125000  |
| Ag                       | -3.61398100 | 0.24995800  | 0.61173200  |
| Ag                       | -0.32631600 | 0.67585700  | 0.57370800  |
| C                        | 4.05023300  | -1.45793600 | -0.06668300 |
| C                        | 4.07232200  | -1.41774400 | -1.59373600 |
| H                        | 3.26152900  | -2.17727000 | 0.19601400  |
| H                        | 5.00364900  | -1.84837100 | 0.30952000  |
| H                        | 3.28358100  | -0.76393800 | -1.96123400 |
| C                        | 4.03040400  | -2.78821100 | -2.24284200 |
| H                        | 3.07264400  | -3.26136800 | -1.98705200 |
| H                        | 4.09882700  | -2.71931800 | -3.33226300 |
| H                        | 4.84349100  | -3.42993300 | -1.88274000 |
| N                        | 3.76504000  | -0.19221300 | 0.57532300  |
| Br                       | 5.78822900  | -0.44292300 | -2.24674300 |
| C                        | 2.43008600  | 0.22434000  | 0.66693400  |
| O                        | 1.57784000  | -0.48516500 | 0.01890100  |
| O                        | 2.13693500  | 1.24407200  | 1.34450000  |
| C                        | 4.79806500  | 0.45686200  | 1.36270600  |
| H                        | 4.39835200  | 1.40442100  | 1.72480400  |
| H                        | 5.09195900  | -0.15271500 | 2.23471000  |
| H                        | 5.68950300  | 0.64635700  | 0.75310600  |
| <b>Ag-Ts<sub>3</sub></b> |             |             |             |
| O                        | -1.27675600 | -2.11527500 | -0.09318300 |
| O                        | -1.28645000 | 2.10910500  | 0.10193000  |
| O                        | -1.28911400 | 0.09443100  | -2.10776600 |
| O                        | -1.27386600 | -0.10060800 | 2.11659200  |
| O                        | 1.01114000  | -0.10243500 | 2.29109100  |
| O                        | 0.99462400  | 0.10669600  | -2.29774800 |

|    |             |             |             |
|----|-------------|-------------|-------------|
| O  | 0.99749200  | 2.29716200  | 0.10104800  |
| O  | 1.00803500  | -2.29204100 | -0.10807900 |
| C  | -0.15182900 | -2.72922500 | -0.12469100 |
| C  | -0.16438300 | 2.72861600  | 0.12560500  |
| C  | -0.16772600 | 0.12452000  | -2.72823500 |
| C  | -0.14818000 | -0.12574400 | 2.72942300  |
| H  | -0.29125600 | -3.82521800 | -0.17458700 |
| H  | -0.28623600 | -0.17655400 | 3.82554900  |
| H  | -0.31342800 | 0.17433000  | -3.82341800 |
| H  | -0.30886900 | 3.82391500  | 0.17633400  |
| Ag | -1.28000800 | -0.00305800 | 0.00437900  |
| Ag | 1.57600100  | 0.00387200  | -0.00539200 |
| C  | 7.35417649  | -0.67323495 | -0.18975448 |
| C  | 7.11472099  | -2.03968633 | 0.42250009  |
| H  | 7.59220388  | 0.04256658  | 0.61934208  |
| H  | 8.20968912  | -0.70672379 | -0.86468664 |
| H  | 6.66825449  | -2.79721617 | -0.19959507 |
| C  | 7.30232615  | -2.28364627 | 1.89488682  |
| H  | 6.45891967  | -1.83852880 | 2.43446338  |
| H  | 7.34414787  | -3.35310810 | 2.11078136  |
| H  | 8.23195397  | -1.82639380 | 2.24709625  |
| N  | 6.18328672  | -0.24729950 | -0.94232259 |
| Br | 9.32385076  | -3.17347393 | -0.28072487 |
| C  | 4.97228484  | -0.53845670 | -0.30930461 |
| O  | 5.06529520  | -1.39809330 | 0.62156718  |
| O  | 3.92258670  | 0.04277751  | -0.71536821 |
| C  | 6.31672746  | 0.90812385  | -1.80614851 |
| H  | 5.35107958  | 1.09976358  | -2.27600702 |
| H  | 6.61809250  | 1.81307311  | -1.24865902 |



|                           |             |             |             |
|---------------------------|-------------|-------------|-------------|
| H                         | 7.06968631  | 0.71258424  | -2.58013210 |
| <b>Ag-Int<sub>5</sub></b> |             |             |             |
| O                         | 3.91017800  | -0.88468200 | -1.93898800 |
| O                         | 3.61600700  | -0.43995900 | 2.34923800  |
| O                         | 2.82806000  | -2.57853700 | 0.36843500  |
| O                         | 4.62093800  | 1.22283300  | 0.09873200  |
| O                         | 2.71751400  | 2.22936000  | -0.66213600 |
| O                         | 0.74376000  | -1.70463300 | 0.60716100  |
| O                         | 1.78095900  | 0.91598900  | 2.18151300  |
| O                         | 1.70963200  | -0.41851300 | -2.27731800 |
| C                         | 2.84730900  | -0.75749100 | -2.62392400 |
| C                         | 2.66803700  | 0.30674500  | 2.79133000  |
| C                         | 1.55390000  | -2.61212100 | 0.51255400  |
| C                         | 3.90689800  | 2.19080900  | -0.36201200 |
| H                         | 3.02223700  | -0.96930200 | -3.66005700 |
| H                         | 4.52678000  | 3.13407900  | -0.46432900 |
| H                         | 1.20891500  | -3.67374800 | 0.66518800  |
| H                         | 2.71360900  | 0.42916200  | 3.86200800  |
| Ag                        | 3.66143500  | -0.65918300 | 0.19391700  |
| Ag                        | 0.99034500  | 0.57409900  | -0.13456700 |
| C                         | -4.57327100 | 0.88906500  | -0.51043200 |
| C                         | -3.89287300 | -0.49098300 | -0.46790900 |
| H                         | -4.91512200 | 1.15999400  | -1.52343400 |
| H                         | -5.43160800 | 0.92077300  | 0.15868900  |
| H                         | -4.02829200 | -0.94977300 | 0.51484200  |
| C                         | -4.32352300 | -1.44741900 | -1.55613900 |
| H                         | -4.17349000 | -1.00562000 | -2.54862100 |
| H                         | -3.75317700 | -2.37756700 | -1.50323100 |
| H                         | -5.38706900 | -1.67014900 | -1.41618300 |

|    |             |             |             |
|----|-------------|-------------|-------------|
| N  | -3.47538900 | 1.74533300  | -0.08549700 |
| Br | -7.64043900 | -0.76739000 | 0.52422200  |
| C  | -2.27628800 | 1.13713600  | -0.27270100 |
| O  | -2.46051800 | -0.16271700 | -0.57460900 |
| O  | -1.16299000 | 1.65687200  | -0.19330800 |
| C  | -3.60778700 | 3.17216200  | 0.05833300  |
| H  | -2.64191300 | 3.58213200  | 0.35646600  |
| H  | -3.91876200 | 3.64112300  | -0.88825800 |
| H  | -4.35541600 | 3.40361900  | 0.82382600  |

**Mn-HKUST-1**

|    |             |             |             |
|----|-------------|-------------|-------------|
| Mn | 0.00592200  | -0.00068400 | -1.53285200 |
| Mn | -0.00591500 | 0.00068300  | 1.53288600  |
| O  | 1.35467400  | 1.52430800  | -0.95894500 |
| O  | -1.34514500 | -1.52551800 | -0.96635200 |
| O  | -1.55662300 | 1.38586400  | -1.30154500 |
| O  | 1.56617800  | -1.38683400 | -1.29097300 |
| O  | 1.52242900  | -1.34684300 | 0.96792100  |
| O  | -1.53193700 | 1.34779500  | 0.95733700  |
| O  | -1.38856100 | -1.56306800 | 1.29254600  |
| O  | 1.37894200  | 1.56430500  | 1.29993200  |
| C  | 1.74227100  | 1.96975500  | 0.15965900  |
| C  | -1.74227400 | -1.96977800 | 0.14957700  |
| C  | -1.96974800 | 1.74226700  | -0.16185300 |
| C  | 1.96979100  | -1.74225500 | -0.14741500 |
| H  | 2.47154400  | 2.79482200  | 0.13203000  |
| H  | 2.79475300  | -2.47163900 | -0.11330300 |
| H  | -2.79474500 | 2.47161600  | -0.13536500 |
| H  | -2.47164300 | -2.79475900 | 0.11663000  |

**Mn-Int<sub>0</sub>**

|    |             |             |             |
|----|-------------|-------------|-------------|
| Mn | 0.00592200  | -0.00068400 | -1.53285200 |
| Mn | -0.00591500 | 0.00068300  | 1.53288600  |
| O  | 1.37267400  | 1.54230800  | -1.12094500 |
| O  | -1.36314500 | -1.54351800 | -1.12835200 |
| O  | -1.53862300 | 1.36786400  | -1.13954500 |
| O  | 1.54817800  | -1.36883400 | -1.12897300 |
| O  | 1.54042900  | -1.36484300 | 1.12992100  |
| O  | -1.54993700 | 1.36579500  | 1.11933700  |
| O  | -1.37056100 | -1.54506800 | 1.13054600  |
| O  | 1.36094200  | 1.54630500  | 1.13793200  |
| C  | 1.74227100  | 1.96975500  | 0.00965900  |
| C  | -1.74227400 | -1.96977800 | -0.00042300 |
| C  | -1.96974800 | 1.74226700  | -0.01185300 |
| C  | 1.96979100  | -1.74225500 | 0.00258500  |
| H  | 2.47154400  | 2.79482200  | 0.01203000  |
| H  | 2.79475300  | -2.47163900 | 0.00669700  |
| H  | -2.79474500 | 2.47161600  | -0.01536500 |
| H  | -2.47164300 | -2.79475900 | -0.00337000 |
| C  | 0.01050257  | 0.11746400  | 4.98979203  |
| C  | 1.21419555  | -0.68483511 | 5.36619637  |
| H  | -0.79374272 | -0.33603867 | 4.41245138  |
| H  | -0.30620152 | 0.90962577  | 5.67125652  |
| H  | 1.69446291  | -0.38423538 | 6.30239905  |
| C  | 1.36888181  | -2.14631228 | 5.01203058  |
| H  | 2.42728620  | -2.41168359 | 4.89433659  |
| H  | 0.94336144  | -2.78434098 | 5.79721771  |
| H  | 0.85854792  | -2.36882076 | 4.06896745  |
| N  | 1.27981197  | 0.29241009  | 4.28133081  |
| C  | 2.00588373  | 1.52901114  | 4.54577431  |

|                           |             |             |             |
|---------------------------|-------------|-------------|-------------|
| H                         | 3.06962377  | 1.37529277  | 4.33146679  |
| H                         | 1.63105538  | 2.31609375  | 3.88159601  |
| H                         | 1.90802050  | 1.88014908  | 5.58994652  |
| <b>Mn-Int<sub>1</sub></b> |             |             |             |
| Mn                        | -3.39184700 | -0.46149300 | 0.11985100  |
| Mn                        | -0.32887000 | 0.24391500  | -0.27499000 |
| O                         | -2.42030800 | -1.56481700 | 1.65163400  |
| O                         | -3.30685900 | 0.82943500  | -1.56068400 |
| O                         | -3.45620600 | -2.16484200 | -1.14226800 |
| O                         | -4.26255400 | 0.95953000  | 1.42147500  |
| O                         | -2.08960000 | 1.42394800  | 1.12885400  |
| O                         | -1.31629900 | -1.48678300 | -1.27379000 |
| O                         | -1.13767900 | 1.47915200  | -1.70717100 |
| O                         | -0.26707100 | -0.88909600 | 1.44345200  |
| C                         | -1.20602900 | -1.54188800 | 1.97815600  |
| C                         | -2.35404100 | 1.48324500  | -2.05608700 |
| C                         | -2.26934900 | -2.26147800 | -1.57070300 |
| C                         | -3.21811000 | 1.65451900  | 1.64089800  |
| H                         | -0.90342900 | -2.16407900 | 2.82358900  |
| H                         | -3.32872500 | 2.51065700  | 2.33027300  |
| H                         | -2.05147900 | -3.09488800 | -2.25994800 |
| H                         | -2.60281400 | 2.13552100  | -2.89910400 |
| C                         | 2.67767300  | -0.15214000 | 0.63561500  |
| C                         | 2.74693700  | -0.59618300 | -0.77193100 |
| H                         | 2.11153800  | -0.72519800 | 1.36334400  |
| H                         | 3.53684900  | 0.41352100  | 0.99251000  |
| H                         | 3.65298000  | -0.26025200 | -1.27819500 |
| C                         | 2.14325100  | -1.88587600 | -1.27079400 |
| H                         | 1.82277400  | -1.79881400 | -2.31682800 |

|                          |             |             |             |
|--------------------------|-------------|-------------|-------------|
| H                        | 2.90152000  | -2.67762800 | -1.21576800 |
| H                        | 1.28056700  | -2.20222500 | -0.67504000 |
| N                        | 1.83037900  | 0.52967200  | -0.39513300 |
| Br                       | 6.03548100  | 0.85160600  | -0.30916200 |
| C                        | 2.29270100  | 1.88009000  | -0.79578600 |
| H                        | 1.91325900  | 2.09956000  | -1.79944900 |
| H                        | 1.88293100  | 2.61813600  | -0.09553500 |
| H                        | 3.38853900  | 1.94015700  | -0.78653100 |
| <b>Mn-Ts<sub>1</sub></b> |             |             |             |
| Mn                       | -3.29831400 | -0.53199300 | 0.07862800  |
| Mn                       | -0.30031600 | 0.56373400  | 0.02366500  |
| O                        | -2.34715500 | -1.52901000 | 1.68761200  |
| O                        | -3.29772600 | 0.86659800  | -1.50418600 |
| O                        | -3.50571100 | -2.25335200 | -1.15634800 |
| O                        | -4.08755000 | 0.92222400  | 1.40434300  |
| O                        | -1.92974300 | 1.53854800  | 1.21348800  |
| O                        | -1.41125600 | -1.46055100 | -1.18093200 |
| O                        | -1.11824400 | 1.48237500  | -1.65273400 |
| O                        | -0.17707800 | -0.88917700 | 1.49245900  |
| C                        | -1.13101200 | -1.53273800 | 2.01133300  |
| C                        | -2.32787200 | 1.49010300  | -2.00925300 |
| C                        | -2.29130400 | -2.28780400 | -1.53921200 |
| C                        | -3.09889200 | 1.66763300  | 1.66924400  |
| H                        | -0.85844200 | -2.17015400 | 2.85540000  |
| H                        | -3.28373800 | 2.50458200  | 2.36208400  |
| H                        | -2.00649200 | -3.10096300 | -2.22813700 |
| H                        | -2.55782700 | 2.12944600  | -2.86729300 |
| C                        | 2.73934000  | 0.83396300  | 0.78437900  |
| C                        | 3.14056400  | 0.19444000  | -0.47176900 |

|    |            |             |             |
|----|------------|-------------|-------------|
| H  | 2.43708800 | 0.14209400  | 1.57401300  |
| H  | 3.42337800 | 1.59422500  | 1.17290400  |
| H  | 3.61243400 | 0.82398600  | -1.21269900 |
| C  | 2.62504700 | -1.14975000 | -0.90773900 |
| H  | 1.77328000 | -1.04971400 | -1.59278500 |
| H  | 3.41991400 | -1.68471200 | -1.43287600 |
| H  | 2.31390700 | -1.75161400 | -0.04842900 |
| N  | 1.61866400 | 1.34902800  | -0.00497600 |
| Br | 5.68290900 | -0.51396900 | 0.10996100  |
| C  | 1.81911500 | 2.71934400  | -0.47082500 |
| H  | 1.08582400 | 2.95871300  | -1.24803100 |
| H  | 1.69468400 | 3.43939700  | 0.35785300  |
| H  | 2.82505100 | 2.88452900  | -0.88971400 |

**Mn-Int<sub>2</sub>**

|    |             |             |             |
|----|-------------|-------------|-------------|
| Mn | -3.27844600 | -0.51594600 | 0.03677200  |
| Mn | -0.25271200 | 0.71074400  | 0.06926200  |
| O  | -2.39127300 | -1.52641400 | 1.65963400  |
| O  | -3.34886700 | 0.88012600  | -1.54110800 |
| O  | -3.56694500 | -2.26220700 | -1.19083900 |
| O  | -4.12475900 | 0.92472000  | 1.37049100  |
| O  | -1.96537300 | 1.54243100  | 1.21081500  |
| O  | -1.47887600 | -1.45773400 | -1.21418900 |
| O  | -1.17536600 | 1.53306900  | -1.63956100 |
| O  | -0.22779700 | -0.86188800 | 1.46778800  |
| C  | -1.17294800 | -1.51763800 | 1.98114800  |
| C  | -2.37359700 | 1.51414900  | -2.02599100 |
| C  | -2.35181800 | -2.28910000 | -1.57257200 |
| C  | -3.14094600 | 1.67068300  | 1.64645100  |
| H  | -0.90342900 | -2.16407900 | 2.82358900  |

|    |             |             |             |
|----|-------------|-------------|-------------|
| H  | -3.32872500 | 2.51065700  | 2.33027300  |
| H  | -2.05147900 | -3.09488800 | -2.25994800 |
| H  | -2.60281400 | 2.13552100  | -2.89910400 |
| C  | 2.73774900  | 0.79192900  | 0.74078800  |
| C  | 3.57772900  | -0.15000300 | -0.13621400 |
| H  | 2.35425500  | 0.21603500  | 1.59347100  |
| H  | 3.39192300  | 1.58614600  | 1.14611500  |
| H  | 3.92370400  | 0.35394200  | -1.03892900 |
| C  | 2.95030900  | -1.49625900 | -0.43792200 |
| H  | 2.00113300  | -1.32918900 | -0.96131900 |
| H  | 3.59626300  | -2.10986000 | -1.07450800 |
| H  | 2.73425900  | -2.04484100 | 0.48539900  |
| N  | 1.64756700  | 1.33932900  | -0.03390000 |
| Br | 5.43184300  | -0.52377500 | 0.82284000  |
| C  | 2.03683700  | 2.49665500  | -0.81802200 |
| H  | 1.17085700  | 2.88672400  | -1.36549100 |
| H  | 2.43301600  | 3.31754900  | -0.18264300 |
| H  | 2.81919600  | 2.28680600  | -1.57543500 |

**Mn-Int<sub>3</sub>**

|    |             |             |             |
|----|-------------|-------------|-------------|
| Mn | -3.20823200 | -0.81869100 | -0.37337600 |
| Mn | -0.11906300 | -0.18183800 | 0.60630900  |
| O  | -2.06436800 | -1.97675300 | -1.70286400 |
| O  | -3.51411900 | 0.46886800  | 1.26540400  |
| O  | -4.07867500 | 0.45093700  | -1.88846300 |
| O  | -3.48624300 | -2.53339900 | 0.91504000  |
| O  | -1.41787600 | -1.76138300 | 1.31910000  |
| O  | -2.00507900 | 1.03720800  | -1.28833100 |
| O  | -1.39324200 | 1.19653300  | 1.63161200  |
| O  | 0.03382400  | -1.25337000 | -1.22080200 |

|                          |             |             |             |
|--------------------------|-------------|-------------|-------------|
| C                        | -0.81534300 | -1.92656200 | -1.86508800 |
| C                        | -2.64028100 | 1.17519100  | 1.83285900  |
| C                        | -3.04874700 | 1.19338700  | -1.97329800 |
| C                        | -2.37085100 | -2.56696000 | 1.50489500  |
| H                        | -0.42723700 | -2.56098800 | -2.67433300 |
| H                        | -2.19919400 | -3.35848700 | 2.24529200  |
| H                        | -3.06938500 | 2.02654600  | -2.69108300 |
| H                        | -3.02315800 | 1.85747600  | 2.60409400  |
| C                        | 2.90642100  | -0.57598600 | 0.78080200  |
| C                        | 3.76082000  | 0.38645200  | -0.06022000 |
| H                        | 2.61425600  | -1.41920700 | 0.14031100  |
| H                        | 3.53115600  | -0.98502800 | 1.59729500  |
| H                        | 4.05450400  | 1.26446800  | 0.51546800  |
| C                        | 3.18944800  | 0.75900900  | -1.41273100 |
| H                        | 2.23171000  | 1.26842900  | -1.25519900 |
| H                        | 3.85615300  | 1.43242800  | -1.96059300 |
| H                        | 3.00307700  | -0.13293600 | -2.02059700 |
| N                        | 1.73637900  | 0.09821600  | 1.29335100  |
| Br                       | 5.65310600  | -0.49984500 | -0.39174200 |
| C                        | -0.83375900 | 3.52620300  | -0.27805600 |
| O                        | -1.88589300 | 4.01441800  | -0.11506300 |
| O                        | 0.24484900  | 3.10869500  | -0.44533000 |
| C                        | 2.00422300  | 0.88064400  | 2.48470500  |
| H                        | 2.67019900  | 1.75096900  | 2.31684200  |
| H                        | 1.06655500  | 1.28044900  | 2.88840400  |
| H                        | 2.48335300  | 0.27387900  | 3.28264100  |
| <b>Mn-Ts<sub>2</sub></b> |             |             |             |
| Mn                       | -0.03184900 | -0.00136700 | -1.48968400 |
| Mn                       | 0.03218100  | 0.00204400  | 1.48971200  |



|    |             |             |             |
|----|-------------|-------------|-------------|
| O  | 1.20841700  | -1.53726600 | -0.59975100 |
| O  | -1.23044100 | 1.53918100  | -0.55670400 |
| O  | 1.56414500  | 1.26501500  | -1.70518900 |
| O  | -1.63223900 | -1.27088600 | -1.64201700 |
| O  | -1.52574100 | -1.21727100 | 0.60826200  |
| O  | 1.55000600  | 1.22211000  | 0.54810200  |
| O  | -1.23499300 | 1.59858300  | 1.69618300  |
| O  | 1.30069200  | -1.59826400 | 1.65104100  |
| C  | 1.61190000  | -2.02054100 | 0.49359500  |
| C  | -1.59295300 | 2.01985300  | 0.55214600  |
| C  | 2.00987700  | 1.60151500  | -0.56394000 |
| C  | -2.02971100 | -1.60385000 | -0.48182000 |
| H  | 2.29366300  | -2.88279600 | 0.44712900  |
| H  | -2.88875400 | -2.28924300 | -0.42970400 |
| H  | 2.87263900  | 2.28409900  | -0.55019300 |
| H  | -2.27927900 | 2.87952600  | 0.53277700  |
| C  | -1.86033407 | -0.15174051 | 4.58897073  |
| C  | -1.78449720 | -0.78091161 | 5.99229253  |
| H  | -2.40077083 | -0.85237532 | 3.93854437  |
| H  | -2.46288574 | 0.77222619  | 4.63680948  |
| H  | -1.04556431 | -0.27446240 | 6.61155913  |
| C  | -1.61228137 | -2.28824198 | 6.00520592  |
| H  | -0.72499334 | -2.55053769 | 5.41716150  |
| H  | -1.48335579 | -2.67732174 | 7.02003598  |
| H  | -2.47363720 | -2.78233817 | 5.54264508  |
| N  | -0.52434562 | 0.11348086  | 4.06250716  |
| Br | -3.54967977 | -0.36270125 | 7.05163026  |
| C  | 1.49082475  | -1.28427835 | 4.66050508  |
| O  | 1.79701242  | -0.77442434 | 5.67639521  |

|                           |             |             |             |
|---------------------------|-------------|-------------|-------------|
| O                         | 1.59546244  | -2.04200421 | 3.76064086  |
| C                         | -0.03928567 | 1.41465500  | 4.51226147  |
| H                         | 0.12580325  | 1.45564174  | 5.60514720  |
| H                         | 0.92319473  | 1.64491321  | 4.03920146  |
| H                         | -0.73800634 | 2.23921046  | 4.26462193  |
| <b>Mn-Int<sub>4</sub></b> |             |             |             |
| Mn                        | 0.63218200  | 0.39569400  | -3.72466900 |
| Mn                        | 0.55420300  | 0.28519700  | -0.49868800 |
| O                         | 1.88201800  | -1.25126100 | -3.28721000 |
| O                         | -0.66210900 | 1.99135900  | -3.23192300 |
| O                         | 2.24345600  | 1.67418000  | -4.38356000 |
| O                         | -1.01180600 | -0.89025700 | -4.24296700 |
| O                         | -0.87791800 | -0.81460300 | -2.00402400 |
| O                         | 2.11881100  | 1.54550300  | -2.15223800 |
| O                         | -0.62032200 | 1.94447900  | -0.95909500 |
| O                         | 1.88956800  | -1.22450600 | -1.01438400 |
| C                         | 2.23089700  | -1.65712500 | -2.14577700 |
| C                         | -0.97422600 | 2.39617900  | -2.07991700 |
| C                         | 2.64110700  | 1.97576700  | -3.21230300 |
| C                         | -1.39728400 | -1.21672000 | -3.07825000 |
| H                         | 2.92526700  | -2.50329500 | -2.13308500 |
| H                         | -2.25715200 | -1.90974000 | -3.00991800 |
| H                         | 3.50424000  | 2.66360000  | -3.13040700 |
| H                         | -1.64767500 | 3.25902600  | -2.04743700 |
| C                         | -0.17847400 | -0.77811900 | 4.13430000  |
| C                         | -1.61534200 | -0.25400900 | 4.23815500  |
| H                         | 0.22689600  | -0.94223700 | 5.13888700  |
| H                         | -0.18722600 | -1.73412100 | 3.60318300  |
| H                         | -2.07351100 | -0.23309600 | 3.25014300  |

|    |             |             |            |
|----|-------------|-------------|------------|
| C  | -1.78469600 | 1.05870200  | 4.97898200 |
| H  | -1.22874600 | 1.83772400  | 4.44148400 |
| H  | -2.83632500 | 1.35723300  | 5.01982700 |
| H  | -1.39968200 | 0.99547500  | 6.00322300 |
| N  | 0.68593200  | 0.16836500  | 3.44212100 |
| Br | -2.71733900 | -1.70673700 | 5.21691200 |
| C  | 0.64781100  | 0.23239500  | 2.05562900 |
| O  | -0.24925000 | -0.44307500 | 1.44528200 |
| O  | 1.48464400  | 0.95813600  | 1.42960700 |
| C  | 1.73328100  | 0.84658700  | 4.18649600 |
| H  | 2.27787200  | 1.48996200  | 3.49456500 |
| H  | 1.31129000  | 1.46060200  | 4.99511100 |
| H  | 2.43833700  | 0.12689400  | 4.63312400 |

**Mn-Ts<sub>3</sub>**

|    |             |             |             |
|----|-------------|-------------|-------------|
| Mn | -0.03184900 | -0.00136700 | -1.48968400 |
| Mn | 0.03218100  | 0.00204400  | 1.48971200  |
| O  | 1.20841700  | -1.53726600 | -0.59975100 |
| O  | -1.23044100 | 1.53918100  | -0.55670400 |
| O  | 1.56414500  | 1.26501500  | -1.70518900 |
| O  | -1.63223900 | -1.27088600 | -1.64201700 |
| O  | -1.52574100 | -1.21727100 | 0.60826200  |
| O  | 1.55000600  | 1.22211000  | 0.54810200  |
| O  | -1.23499300 | 1.59858300  | 1.69618300  |
| O  | 1.30069200  | -1.59826400 | 1.65104100  |
| C  | 1.61190000  | -2.02054100 | 0.49359500  |
| C  | -1.59295300 | 2.01985300  | 0.55214600  |
| C  | 2.00987700  | 1.60151500  | -0.56394000 |
| C  | -2.02971100 | -1.60385000 | -0.48182000 |
| H  | 2.29366300  | -2.88279600 | 0.44712900  |

|                           |             |             |             |
|---------------------------|-------------|-------------|-------------|
| H                         | -2.88875400 | -2.28924300 | -0.42970400 |
| H                         | 2.87263900  | 2.28409900  | -0.55019300 |
| H                         | -2.27927900 | 2.87952600  | 0.53277700  |
| C                         | 0.06708766  | -0.79568672 | 7.41743033  |
| C                         | 0.77043288  | -2.10258487 | 7.10645336  |
| H                         | -1.01347915 | -0.99473169 | 7.54558098  |
| H                         | 0.44051440  | -0.37948342 | 8.35331710  |
| H                         | 1.78482748  | -2.05367646 | 6.74756933  |
| C                         | 0.02886031  | -3.41128311 | 7.10272952  |
| H                         | -0.58188502 | -3.46580567 | 6.19464123  |
| H                         | 0.72368017  | -4.25330957 | 7.12075494  |
| H                         | -0.62479280 | -3.48766770 | 7.97693899  |
| N                         | 0.30252549  | 0.16788164  | 6.35212865  |
| Br                        | 1.90357738  | -2.48804186 | 9.39286112  |
| C                         | 0.23798345  | -0.38476890 | 5.07055870  |
| O                         | 0.32049257  | -1.65233670 | 5.04581130  |
| O                         | 0.12678268  | 0.39674197  | 4.07987097  |
| C                         | -0.07111382 | 1.54705216  | 6.59147591  |
| H                         | 0.15356187  | 2.12507306  | 5.69404551  |
| H                         | -1.14782960 | 1.65481345  | 6.81422953  |
| H                         | 0.49874767  | 1.94813007  | 7.43919506  |
| <b>Mn-Int<sub>5</sub></b> |             |             |             |
| Mn                        | 0.59766900  | 0.36994800  | -3.82632800 |
| Mn                        | 0.66354900  | 0.37673100  | -0.70686700 |
| O                         | 1.88410300  | -1.22675800 | -3.27578800 |
| O                         | -0.64150300 | 1.98728500  | -3.22655400 |
| O                         | 2.20579500  | 1.64594000  | -4.29471700 |
| O                         | -1.02608900 | -0.90500600 | -4.26372800 |
| O                         | -0.85847500 | -0.79878800 | -2.02881400 |

|    |             |             |             |
|----|-------------|-------------|-------------|
| O  | 2.16542600  | 1.57568400  | -2.04719800 |
| O  | -0.59861900 | 1.97137600  | -0.95816500 |
| O  | 1.90625100  | -1.22260200 | -1.00710800 |
| C  | 2.23971700  | -1.65370300 | -2.14576900 |
| C  | -0.96492600 | 2.40790900  | -2.08470800 |
| C  | 2.63979500  | 1.97301700  | -3.14634500 |
| C  | -1.39818200 | -1.21854500 | -3.08970400 |
| H  | 2.92526700  | -2.50329500 | -2.13308500 |
| H  | -2.25715200 | -1.90974000 | -3.00991800 |
| H  | 3.50424000  | 2.66360000  | -3.13040700 |
| H  | -1.64767500 | 3.25902600  | -2.04743700 |
| C  | -0.60847000 | -0.26433800 | 4.45950100  |
| C  | -1.62448100 | -0.77307600 | 3.41381200  |
| H  | -1.06566700 | 0.42538300  | 5.17359600  |
| H  | -0.16089500 | -1.08364400 | 5.02910400  |
| H  | -1.77468900 | -1.84725800 | 3.50102000  |
| C  | -2.94784800 | -0.03570600 | 3.39586800  |
| H  | -2.79636500 | 1.04895900  | 3.31593700  |
| H  | -3.56217700 | -0.36779800 | 2.55136000  |
| H  | -3.46462000 | -0.27146500 | 4.33241300  |
| N  | 0.38039700  | 0.42150200  | 3.61470600  |
| Br | -2.52136700 | -2.22262900 | 6.39331100  |
| C  | 0.17648600  | 0.16937700  | 2.31409400  |
| O  | -0.92836200 | -0.54381600 | 2.11202000  |
| O  | 0.91050900  | 0.54199600  | 1.37142900  |
| C  | 1.55408100  | 1.08443200  | 4.14053300  |
| H  | 2.13077000  | 1.49234600  | 3.30792900  |
| H  | 1.25711400  | 1.89777300  | 4.81320100  |
| H  | 2.17799200  | 0.37649200  | 4.70252500  |

**Cd-HKUST-1**

|    |             |             |             |
|----|-------------|-------------|-------------|
| Cd | -1.50986600 | -0.00198000 | -0.00036500 |
| Cd | 1.51071900  | 0.00200100  | 0.00018400  |
| O  | -1.78629100 | -1.33462200 | -1.68608400 |
| O  | -1.79260800 | 1.32826700  | 1.68637600  |
| O  | -0.47476100 | 1.62690200  | -1.28702100 |
| O  | -0.46878900 | -1.62811400 | 1.28574600  |
| O  | 1.79157800  | -1.68398500 | 1.33139500  |
| O  | 1.78554300  | 1.69009400  | -1.32930500 |
| O  | 0.46755400  | 1.28747600  | 1.62542600  |
| O  | 0.47385500  | -1.28617500 | -1.62626900 |
| C  | -0.62661000 | -1.66099800 | -2.09787700 |
| C  | -0.63393400 | 1.65843800  | 2.09784900  |
| C  | 0.62601200  | 2.10094400  | -1.65762900 |
| C  | 0.63298900  | -2.09835700 | 1.65846700  |
| H  | -0.60576900 | -2.34573900 | -2.96134000 |
| H  | 0.61455800  | -2.96264300 | 2.34223700  |
| H  | 0.60583500  | 2.96566500  | -2.34081800 |
| H  | -0.61495200 | 2.34281200  | 2.96163700  |

**Cd-Int<sub>0</sub>**

|    |             |             |             |
|----|-------------|-------------|-------------|
| Cd | -1.50986600 | -0.00198100 | -0.00036500 |
| Cd | 1.51071900  | 0.00200200  | 0.00018400  |
| O  | -1.78629100 | -1.33462300 | -1.68608400 |
| O  | -1.79260900 | 1.32826600  | 1.68637600  |
| O  | -0.47476200 | 1.62690200  | -1.28702100 |
| O  | -0.46878800 | -1.62811400 | 1.28574600  |
| O  | 1.79157900  | -1.68398400 | 1.33139500  |
| O  | 1.78554200  | 1.69009500  | -1.32930500 |

|                           |             |             |             |
|---------------------------|-------------|-------------|-------------|
| O                         | 0.46755300  | 1.28747600  | 1.62542600  |
| O                         | 0.47385500  | -1.28617500 | -1.62626900 |
| C                         | -0.62660900 | -1.66099800 | -2.09787700 |
| C                         | -0.63393500 | 1.65843800  | 2.09784900  |
| C                         | 0.62601100  | 2.10094400  | -1.65762900 |
| C                         | 0.63299000  | -2.09835700 | 1.65846700  |
| H                         | -0.60576800 | -2.34573900 | -2.96134000 |
| H                         | 0.61455900  | -2.96264300 | 2.34223700  |
| H                         | 0.60583400  | 2.96566500  | -2.34081800 |
| H                         | -0.61495300 | 2.34281200  | 2.96163700  |
| C                         | 4.25892782  | -0.12967710 | 0.20678179  |
| C                         | 4.85656270  | -0.60163618 | -1.07942506 |
| H                         | 3.51917693  | -0.73797445 | 0.72499056  |
| H                         | 4.87809083  | 0.49070351  | 0.85791977  |
| H                         | 5.87768851  | -0.25614840 | -1.26766073 |
| C                         | 4.50982988  | -1.93367678 | -1.70450183 |
| H                         | 4.60591328  | -1.89139604 | -2.79696418 |
| H                         | 5.17695449  | -2.72280036 | -1.33450756 |
| H                         | 3.47753007  | -2.21189350 | -1.46728605 |
| N                         | 3.82980225  | 0.43853807  | -1.07253543 |
| C                         | 4.26444408  | 1.80123854  | -1.35613132 |
| H                         | 4.26952188  | 1.95963326  | -2.44055986 |
| H                         | 3.55485850  | 2.50637359  | -0.90846964 |
| H                         | 5.27376836  | 2.02964816  | -0.96592086 |
| <b>Cd-Int<sub>1</sub></b> |             |             |             |
| Cd                        | -3.00806400 | 0.81333000  | 0.42162400  |
| Cd                        | 0.31309200  | 0.46654700  | -0.05631400 |
| O                         | -3.56975400 | -0.52978600 | -1.30084900 |
| O                         | -3.70512000 | 2.16067500  | 2.09392900  |

|    |             |             |             |
|----|-------------|-------------|-------------|
| O  | -2.35211100 | 2.42514000  | -1.04024200 |
| O  | -2.42082800 | -0.97889600 | 1.68267600  |
| O  | -0.14836400 | -0.84219600 | 1.65389600  |
| O  | -0.07345700 | 2.39044400  | -1.03074700 |
| O  | -1.47357900 | 2.02733300  | 1.91140700  |
| O  | -1.31970500 | -0.52236900 | -1.27824300 |
| C  | -2.43846800 | -0.87896000 | -1.73814100 |
| C  | -2.51988500 | 2.45400300  | 2.46084700  |
| C  | -1.21537000 | 2.85355500  | -1.34414500 |
| C  | -1.26240500 | -1.32665400 | 2.01551200  |
| H  | -2.41097400 | -1.55953100 | -2.59779500 |
| H  | -1.19064700 | -2.17643500 | 2.70578200  |
| H  | -1.19937200 | 3.75187300  | -1.97727300 |
| H  | -2.42015900 | 3.12902000  | 3.32518200  |
| C  | 2.98921300  | -1.27628400 | 0.60560200  |
| C  | 2.66958800  | -1.76573900 | -0.75232200 |
| H  | 2.31553800  | -1.48457000 | 1.43274400  |
| H  | 4.04814500  | -1.16371600 | 0.83118800  |
| H  | 3.55937400  | -1.91547900 | -1.36734900 |
| C  | 1.48937700  | -2.65187600 | -1.06369600 |
| H  | 1.10692200  | -2.46712500 | -2.07507800 |
| H  | 1.81395900  | -3.69880100 | -1.01357500 |
| H  | 0.66736200  | -2.52022700 | -0.35258300 |
| N  | 2.43746000  | -0.32438300 | -0.40990900 |
| Br | 6.24311700  | -1.96184400 | -0.96745000 |
| C  | 3.41624100  | 0.62969500  | -0.98566800 |
| H  | 3.05525900  | 0.95635700  | -1.96734700 |
| H  | 3.48901400  | 1.50397100  | -0.32810300 |
| H  | 4.40477800  | 0.16410700  | -1.09127700 |



**Cd-Ts<sub>1</sub>**

|    |             |             |             |
|----|-------------|-------------|-------------|
| Cd | -1.50986600 | -0.00198100 | -0.00036500 |
| Cd | 1.51071900  | 0.00200200  | 0.00018400  |
| O  | -1.78629100 | -1.33462300 | -1.68608400 |
| O  | -1.79260900 | 1.32826600  | 1.68637600  |
| O  | -0.47476200 | 1.62690200  | -1.28702100 |
| O  | -0.46878800 | -1.62811400 | 1.28574600  |
| O  | 1.79157900  | -1.68398400 | 1.33139500  |
| O  | 1.78554200  | 1.69009500  | -1.32930500 |
| O  | 0.46755300  | 1.28747600  | 1.62542600  |
| O  | 0.47385500  | -1.28617500 | -1.62626900 |
| C  | -0.62660900 | -1.66099800 | -2.09787700 |
| C  | -0.63393500 | 1.65843800  | 2.09784900  |
| C  | 0.62601100  | 2.10094400  | -1.65762900 |
| C  | 0.63299000  | -2.09835700 | 1.65846700  |
| H  | -0.60576800 | -2.34573900 | -2.96134000 |
| H  | 0.61455900  | -2.96264300 | 2.34223700  |
| H  | 0.60583400  | 2.96566500  | -2.34081800 |
| H  | -0.61495300 | 2.34281200  | 2.96163700  |
| C  | 4.66685784  | -0.40118769 | 0.96583737  |
| C  | 5.16174991  | -1.15067761 | -0.20929050 |
| H  | 4.06244868  | -0.99325863 | 1.65445916  |
| H  | 5.39527500  | 0.22163459  | 1.49080137  |
| H  | 5.88353251  | -0.65576846 | -0.84408953 |
| C  | 4.48035156  | -2.38612377 | -0.73169547 |
| H  | 3.75037661  | -2.13055687 | -1.50908327 |
| H  | 5.22710577  | -3.05728064 | -1.16262345 |
| H  | 3.95751393  | -2.91445440 | 0.07078147  |
| N  | 3.88433067  | 0.26344785  | -0.06117847 |

|                           |             |             |             |
|---------------------------|-------------|-------------|-------------|
| Br                        | 7.34342174  | -2.26445464 | 0.84360187  |
| C                         | 4.37873878  | 1.58846770  | -0.42235301 |
| H                         | 3.94601807  | 1.90182206  | -1.37607388 |
| H                         | 4.07915925  | 2.30927778  | 0.35210799  |
| H                         | 5.47629338  | 1.60008986  | -0.50107901 |
| <b>Cd-Int<sub>2</sub></b> |             |             |             |
| Cd                        | -2.91058300 | 0.81910300  | 0.40377800  |
| Cd                        | 0.46879700  | 0.40126800  | -0.12417200 |
| O                         | -3.57399000 | -0.53002500 | -1.30869000 |
| O                         | -3.69777300 | 2.14573800  | 2.09445100  |
| O                         | -2.42236100 | 2.48216900  | -1.04867000 |
| O                         | -2.40630200 | -0.98781500 | 1.66760200  |
| O                         | -0.13048800 | -0.92345300 | 1.56488200  |
| O                         | -0.14731400 | 2.36140000  | -1.00188600 |
| O                         | -1.46309400 | 2.02076400  | 1.93643700  |
| O                         | -1.32568500 | -0.50600600 | -1.27818500 |
| C                         | -2.43937800 | -0.87494500 | -1.74054700 |
| C                         | -2.51818100 | 2.44495000  | 2.46923200  |
| C                         | -1.25841900 | 2.86005700  | -1.33678400 |
| C                         | -1.24487600 | -1.35592600 | 1.97582900  |
| H                         | -2.41097400 | -1.55953100 | -2.59779500 |
| H                         | -1.19064700 | -2.17643500 | 2.70578200  |
| H                         | -1.19937200 | 3.75187300  | -1.97727300 |
| H                         | -2.42015900 | 3.12902000  | 3.32518200  |
| C                         | 3.41127200  | -0.88095400 | -0.08944400 |
| C                         | 3.65918000  | -1.95964800 | -1.15800100 |
| H                         | 2.95725600  | -1.36438700 | 0.78696600  |
| H                         | 4.38623000  | -0.47178700 | 0.23634000  |
| H                         | 4.04739800  | -1.51898300 | -2.07626400 |

|    |            |             |             |
|----|------------|-------------|-------------|
| C  | 2.49593000 | -2.89562300 | -1.42178600 |
| H  | 1.64057800 | -2.29905400 | -1.76141700 |
| H  | 2.73426400 | -3.63259300 | -2.19547000 |
| H  | 2.20419300 | -3.42597400 | -0.50796700 |
| N  | 2.55204800 | 0.14848100  | -0.61978400 |
| Br | 5.30547600 | -3.15511200 | -0.57643200 |
| C  | 3.26751100 | 1.16139300  | -1.37291700 |
| H  | 2.58533000 | 1.96678400  | -1.66869700 |
| H  | 4.08692000 | 1.62295900  | -0.78068100 |
| H  | 3.73609200 | 0.78588400  | -2.30618600 |

**Cd-Int<sub>3</sub>**

|    |             |             |             |
|----|-------------|-------------|-------------|
| Cd | -0.14758800 | -0.00655700 | -0.45725200 |
| Cd | 3.19153300  | -0.67069900 | 0.13352200  |
| O  | 1.01978500  | 1.91079400  | -0.61672500 |
| O  | -0.01830400 | -1.88640000 | 0.73001800  |
| O  | 2.00871000  | 0.34277700  | 1.99030200  |
| O  | 1.45301700  | -0.91635600 | -1.84873500 |
| O  | 3.60234900  | -1.56422600 | -1.93045000 |
| O  | 4.18302400  | -0.18599700 | 2.14147200  |
| O  | 2.15270700  | -2.57563400 | 0.77362100  |
| O  | 3.24030600  | 1.41700800  | -0.74269300 |
| C  | 2.23954700  | 2.16889600  | -0.84057400 |
| C  | 0.91803400  | -2.70160100 | 0.96857700  |
| C  | 3.09664800  | 0.28086400  | 2.61436300  |
| C  | 2.45137400  | -1.42571700 | -2.42790400 |
| H  | 2.45160700  | 3.19723000  | -1.16622900 |
| H  | 2.29392500  | -1.77538500 | -3.45657400 |
| H  | 3.11606700  | 0.65850200  | 3.64806500  |
| H  | 0.60650100  | -3.66188000 | 1.40519100  |

|                          |             |             |             |
|--------------------------|-------------|-------------|-------------|
| C                        | -3.29186900 | -0.44876700 | -0.76084200 |
| C                        | -4.25153300 | 0.08436600  | 0.31885300  |
| H                        | -2.93056300 | -1.43427500 | -0.43634300 |
| H                        | -3.86321700 | -0.60660900 | -1.69618800 |
| H                        | -4.60870700 | 1.08444500  | 0.06997700  |
| C                        | -3.74263900 | 0.00032100  | 1.74546400  |
| H                        | -2.82290200 | 0.59330400  | 1.82237200  |
| H                        | -4.47218700 | 0.39466500  | 2.46011900  |
| H                        | -3.50537500 | -1.03451600 | 2.01711200  |
| N                        | -2.19397100 | 0.46920500  | -0.94991100 |
| Br                       | -6.05793600 | -1.00442400 | 0.22529000  |
| C                        | -0.34558300 | 4.15540600  | 0.59386200  |
| O                        | 0.08131500  | 4.89332500  | -0.21058100 |
| O                        | -0.78847700 | 3.47193800  | 1.43163000  |
| C                        | -2.51666900 | 1.56432600  | -1.84370200 |
| H                        | -3.30092800 | 2.24708600  | -1.45688700 |
| H                        | -1.62906700 | 2.18316200  | -2.02609500 |
| H                        | -2.87828000 | 1.20657800  | -2.83271200 |
| <b>Cd-Ts<sub>2</sub></b> |             |             |             |
| Cd                       | -1.50986600 | -0.00198100 | -0.00036500 |
| Cd                       | 1.51071900  | 0.00200200  | 0.00018400  |
| O                        | -1.78629100 | -1.33462300 | -1.68608400 |
| O                        | -1.79260900 | 1.32826600  | 1.68637600  |
| O                        | -0.47476200 | 1.62690200  | -1.28702100 |
| O                        | -0.46878800 | -1.62811400 | 1.28574600  |
| O                        | 1.79157900  | -1.68398400 | 1.33139500  |
| O                        | 1.78554200  | 1.69009500  | -1.32930500 |
| O                        | 0.46755300  | 1.28747600  | 1.62542600  |
| O                        | 0.47385500  | -1.28617500 | -1.62626900 |

|                           |             |             |             |
|---------------------------|-------------|-------------|-------------|
| C                         | -0.62660900 | -1.66099800 | -2.09787700 |
| C                         | -0.63393500 | 1.65843800  | 2.09784900  |
| C                         | 0.62601100  | 2.10094400  | -1.65762900 |
| C                         | 0.63299000  | -2.09835700 | 1.65846700  |
| H                         | -0.60576800 | -2.34573900 | -2.96134000 |
| H                         | 0.61455900  | -2.96264300 | 2.34223700  |
| H                         | 0.60583400  | 2.96566500  | -2.34081800 |
| H                         | -0.61495300 | 2.34281200  | 2.96163700  |
| C                         | -4.49780773 | -0.18079731 | 1.89326597  |
| C                         | -5.76939850 | 0.68086755  | 2.07080028  |
| H                         | -3.73326665 | 0.20247139  | 2.57881260  |
| H                         | -4.71753967 | -1.21659522 | 2.20117744  |
| H                         | -6.34942264 | 0.71566911  | 1.14937456  |
| C                         | -5.53352801 | 2.06153839  | 2.65394539  |
| H                         | -4.81209260 | 2.59170209  | 2.02162429  |
| H                         | -6.45723770 | 2.64715734  | 2.70555640  |
| H                         | -5.10720215 | 1.98931409  | 3.66080343  |
| N                         | -3.98800537 | -0.14900828 | 0.51860644  |
| Br                        | -7.12812135 | -0.34722543 | 3.29848303  |
| C                         | -4.08892401 | 1.96743828  | -0.59460487 |
| O                         | -4.81894968 | 1.67477966  | -1.47902158 |
| O                         | -3.37650742 | 2.61635367  | 0.09272058  |
| C                         | -4.77017674 | -1.03816982 | -0.34184180 |
| H                         | -5.81895006 | -0.71150967 | -0.44203216 |
| H                         | -4.34488179 | -1.05723536 | -1.34901048 |
| H                         | -4.78385482 | -2.07698616 | 0.03666078  |
| <b>Cd-Int<sub>4</sub></b> |             |             |             |
| Cd                        | -3.42938200 | 0.23465700  | 0.19514100  |
| Cd                        | -0.05907000 | 0.57705400  | 0.62913200  |

|    |             |             |             |
|----|-------------|-------------|-------------|
| O  | -4.19659600 | -1.10541700 | -1.49687200 |
| O  | -4.08852700 | 1.57764600  | 1.91035200  |
| O  | -2.92571400 | 2.03337600  | -1.08286200 |
| O  | -2.90677800 | -1.43394100 | 1.63356500  |
| O  | -0.62952500 | -1.30348700 | 1.63538200  |
| O  | -0.64935100 | 1.99486500  | -0.95347400 |
| O  | -1.84013700 | 1.54100600  | 1.86689700  |
| O  | -1.96337200 | -0.96685700 | -1.33364400 |
| C  | -3.01416800 | -1.39819900 | -1.86922400 |
| C  | -2.94688300 | 1.91746200  | 2.33676100  |
| C  | -1.76311800 | 2.41193800  | -1.37577900 |
| C  | -1.74691100 | -1.80580200 | 1.94264400  |
| H  | -2.91190200 | -2.08317300 | -2.72687900 |
| H  | -1.69157500 | -2.70007700 | 2.57669800  |
| H  | -1.70030000 | 3.22823100  | -2.10635700 |
| H  | -2.92108700 | 2.60537800  | 3.19609800  |
| C  | 4.74510500  | 0.28770800  | -0.36932600 |
| C  | 4.88942700  | -1.23411600 | -0.26275200 |
| H  | 5.73776100  | 0.75226100  | -0.36431300 |
| H  | 4.25285400  | 0.53192700  | -1.31589200 |
| H  | 3.91928400  | -1.70690100 | -0.40836900 |
| C  | 5.59806000  | -1.73784000 | 0.97897600  |
| H  | 5.66927800  | -2.82995300 | 0.98123300  |
| H  | 6.60881400  | -1.32311300 | 1.06165900  |
| H  | 5.01872300  | -1.43089800 | 1.85932600  |
| N  | 3.98142800  | 0.83371900  | 0.74757100  |
| Br | 5.95155900  | -1.85636200 | -1.92380600 |
| C  | 2.59569800  | 0.74265900  | 0.72210800  |
| O  | 2.06241400  | 0.02713100  | -0.18773700 |

|                          |             |             |             |
|--------------------------|-------------|-------------|-------------|
| O                        | 1.90949600  | 1.35914500  | 1.60484500  |
| C                        | 4.65124700  | 1.71423100  | 1.69116700  |
| H                        | 3.93233900  | 2.00229700  | 2.45942200  |
| H                        | 5.50271200  | 1.20417800  | 2.16457500  |
| H                        | 5.02600600  | 2.62704100  | 1.19746700  |
| <b>Cd-Ts<sub>3</sub></b> |             |             |             |
| Cd                       | -1.50986600 | -0.00198100 | -0.00036500 |
| Cd                       | 1.51071900  | 0.00200200  | 0.00018400  |
| O                        | -1.78629100 | -1.33462300 | -1.68608400 |
| O                        | -1.79260900 | 1.32826600  | 1.68637600  |
| O                        | -0.47476200 | 1.62690200  | -1.28702100 |
| O                        | -0.46878800 | -1.62811400 | 1.28574600  |
| O                        | 1.79157900  | -1.68398400 | 1.33139500  |
| O                        | 1.78554200  | 1.69009500  | -1.32930500 |
| O                        | 0.46755300  | 1.28747600  | 1.62542600  |
| O                        | 0.47385500  | -1.28617500 | -1.62626900 |
| C                        | -0.62660900 | -1.66099800 | -2.09787700 |
| C                        | -0.63393500 | 1.65843800  | 2.09784900  |
| C                        | 0.62601100  | 2.10094400  | -1.65762900 |
| C                        | 0.63299000  | -2.09835700 | 1.65846700  |
| H                        | -0.60576800 | -2.34573900 | -2.96134000 |
| H                        | 0.61455900  | -2.96264300 | 2.34223700  |
| H                        | 0.60583400  | 2.96566500  | -2.34081800 |
| H                        | -0.61495300 | 2.34281200  | 2.96163700  |
| C                        | 6.94434212  | -0.62517487 | 0.99971155  |
| C                        | 6.45812666  | -2.06238455 | 0.90169556  |
| H                        | 7.63559063  | -0.52558277 | 1.84043222  |
| H                        | 7.48772545  | -0.35069912 | 0.08577619  |
| H                        | 6.48126191  | -2.55963979 | -0.05121005 |

|                           |             |             |             |
|---------------------------|-------------|-------------|-------------|
| C                         | 6.03854159  | -2.81978832 | 2.13413538  |
| H                         | 5.00174928  | -2.57195862 | 2.38776047  |
| H                         | 6.10896820  | -3.89602943 | 1.96331985  |
| H                         | 6.68225582  | -2.56442597 | 2.98083554  |
| N                         | 5.80215186  | 0.26629518  | 1.21775276  |
| Br                        | 8.95234676  | -2.95711380 | 0.87592993  |
| C                         | 4.61810035  | -0.19095934 | 0.70647225  |
| O                         | 4.61170585  | -1.41378616 | 0.34221848  |
| O                         | 3.60056635  | 0.57860393  | 0.64442756  |
| C                         | 6.04719742  | 1.66936306  | 1.48073024  |
| H                         | 5.08738748  | 2.17084536  | 1.61298315  |
| H                         | 6.64672229  | 1.78083004  | 2.39282994  |
| H                         | 6.58784092  | 2.14968773  | 0.64931790  |
| <b>Cd-Int<sub>5</sub></b> |             |             |             |
| Cd                        | -3.57475500 | 0.22625700  | 0.19386100  |
| Cd                        | -0.32679300 | 0.40418500  | 0.40576900  |
| O                         | -4.18567000 | -1.10842500 | -1.49645300 |
| O                         | -4.05975400 | 1.57351500  | 1.89893700  |
| O                         | -2.87765600 | 1.98916900  | -1.06870800 |
| O                         | -2.87867800 | -1.41317400 | 1.61094500  |
| O                         | -0.60120500 | -1.40350500 | 1.55139200  |
| O                         | -0.59985200 | 1.93730100  | -1.08410600 |
| O                         | -1.80290500 | 1.55545300  | 1.87469500  |
| O                         | -1.95247200 | -0.96340800 | -1.32230900 |
| C                         | -3.00041200 | -1.39832800 | -1.86576600 |
| C                         | -2.91855100 | 1.91877600  | 2.33237900  |
| C                         | -1.73903200 | 2.38033200  | -1.41935700 |
| C                         | -1.73672300 | -1.83744100 | 1.90866200  |
| H                         | -2.91190200 | -2.08317300 | -2.72687900 |



|    |             |             |             |
|----|-------------|-------------|-------------|
| H  | -1.69157500 | -2.70007700 | 2.57669800  |
| H  | -1.70030000 | 3.22823100  | -2.10635700 |
| H  | -2.92108700 | 2.60537800  | 3.19609800  |
| C  | 4.90513800  | -0.52129900 | -0.21555300 |
| C  | 3.85575200  | -1.30670300 | -1.03224400 |
| H  | 5.58942200  | -1.18497600 | 0.31854600  |
| H  | 5.50792600  | 0.13566600  | -0.84850100 |
| H  | 3.97491300  | -1.13135600 | -2.09918000 |
| C  | 3.78018500  | -2.78797200 | -0.72409300 |
| H  | 2.92989800  | -3.24636000 | -1.24144600 |
| H  | 4.70941900  | -3.24260900 | -1.08371300 |
| H  | 3.67249900  | -2.96309700 | 0.35442300  |
| N  | 4.06035300  | 0.23904900  | 0.71806600  |
| Br | 6.89167800  | -1.81687900 | -2.56402100 |
| C  | 2.76448000  | 0.16329300  | 0.38527100  |
| O  | 2.56217800  | -0.66726300 | -0.63807400 |
| O  | 1.82164200  | 0.77277000  | 0.93735200  |
| C  | 4.59021700  | 1.13608100  | 1.72251800  |
| H  | 3.75746600  | 1.58464500  | 2.26830100  |
| H  | 5.22987900  | 0.58338000  | 2.42090000  |
| H  | 5.18851600  | 1.92968700  | 1.25500400  |

**Rh-HKUST-1**

|   |             |             |             |
|---|-------------|-------------|-------------|
| O | -1.12153100 | 1.44627200  | -1.49767400 |
| O | -1.12192400 | -1.44617100 | 1.49752300  |
| O | -1.12291800 | 1.49850200  | 1.44620900  |
| O | -1.12278300 | -1.49841600 | -1.44641900 |
| O | 1.12155800  | -1.49799100 | -1.44569100 |
| O | 1.12142400  | 1.49788600  | 1.44585600  |
| O | 1.12243100  | -1.44656300 | 1.49813400  |

|    |             |             |             |
|----|-------------|-------------|-------------|
| O  | 1.12282200  | 1.44649900  | -1.49791400 |
| C  | 0.00062900  | 1.87415000  | -1.94001800 |
| C  | 0.00013600  | -1.87407500 | 1.94010600  |
| C  | -0.00054000 | 1.94128000  | 1.87286300  |
| C  | -0.00037200 | -1.94125100 | -1.87292700 |
| H  | 0.00034700  | 2.63356300  | -2.72548400 |
| H  | 0.00002100  | -2.72780300 | -2.63122400 |
| H  | -0.00020600 | 2.72785300  | 2.63113900  |
| H  | -0.00033600 | -2.63343000 | 2.72562700  |
| Rh | 1.54135500  | -0.00007200 | 0.00012400  |
| Rh | -1.54114400 | 0.00004800  | -0.00013400 |

**Rh-Int<sub>0</sub>**

|    |             |             |             |
|----|-------------|-------------|-------------|
| O  | 1.46229400  | -1.46182500 | -1.13833900 |
| O  | -1.46229300 | 1.46183000  | -1.13833600 |
| O  | 1.46190800  | 1.46220400  | -1.13839000 |
| O  | -1.46190900 | -1.46220500 | -1.13839000 |
| O  | -1.46192100 | -1.46220400 | 1.13832900  |
| O  | 1.46192000  | 1.46220100  | 1.13832900  |
| O  | -1.46227300 | 1.46184100  | 1.13838300  |
| O  | 1.46227600  | -1.46183800 | 1.13838000  |
| C  | 1.85720400  | -1.85650600 | 0.00001800  |
| C  | -1.85719300 | 1.85651800  | 0.00002200  |
| C  | 1.85675000  | 1.85695900  | -0.00002600 |
| C  | -1.85674600 | -1.85696700 | -0.00002600 |
| H  | 2.63381900  | -2.63267900 | 0.00002200  |
| H  | -2.63318100 | -2.63332000 | -0.00003600 |
| H  | 2.63319200  | 2.63330500  | -0.00003400 |
| H  | -2.63379500 | 2.63270400  | 0.00002700  |
| Rh | -0.00000100 | -0.00000100 | 1.20306600  |

|                           |             |             |             |
|---------------------------|-------------|-------------|-------------|
| Rh                        | -0.00000200 | 0.00000000  | -1.20305800 |
| C                         | -0.46852954 | 1.33715229  | 3.63963147  |
| C                         | -0.95892610 | 0.01120905  | 4.12504535  |
| H                         | -1.05500551 | 1.91178141  | 2.92433803  |
| H                         | 0.13503371  | 1.93758380  | 4.32330465  |
| H                         | -0.64263815 | -0.25468153 | 5.13833530  |
| C                         | -2.28151420 | -0.58128435 | 3.69494182  |
| H                         | -2.24346228 | -1.67802264 | 3.70946219  |
| H                         | -3.08863229 | -0.25987924 | 4.36570718  |
| H                         | -2.53017541 | -0.26594629 | 2.67609527  |
| N                         | 0.10980498  | 0.09184770  | 3.13128568  |
| C                         | 1.45931199  | -0.22847475 | 3.58130465  |
| H                         | 1.61600967  | -1.31074744 | 3.50897484  |
| H                         | 2.18479670  | 0.26893909  | 2.92756194  |
| H                         | 1.65969649  | 0.08373038  | 4.62319940  |
| <b>Rh-Int<sub>1</sub></b> |             |             |             |
| O                         | -2.62557100 | -1.21354900 | -1.76458300 |
| O                         | -2.69554900 | 0.23171200  | 2.13515100  |
| O                         | -3.45025800 | 1.31004000  | -0.49440600 |
| O                         | -1.88279700 | -2.29718700 | 0.86457000  |
| O                         | 0.22841400  | -1.46990200 | 0.60421600  |
| O                         | -1.33582700 | 2.14256600  | -0.73934100 |
| O                         | -0.57250700 | 1.03780000  | 1.88799000  |
| O                         | -0.52260600 | -0.36050000 | -2.03238500 |
| C                         | -1.56553000 | -0.97136500 | -2.41080200 |
| C                         | -1.64610100 | 0.81844000  | 2.52534800  |
| C                         | -2.60149800 | 2.19907900  | -0.78967400 |
| C                         | -0.62170100 | -2.36009200 | 0.90795900  |
| H                         | -1.54298700 | -1.34324300 | -3.44394800 |

|                          |             |             |             |
|--------------------------|-------------|-------------|-------------|
| H                        | -0.18777600 | -3.30691800 | 1.25165400  |
| H                        | -3.01694600 | 3.15534500  | -1.13727500 |
| H                        | -1.66164100 | 1.19175200  | 3.55831900  |
| Rh                       | -0.44774500 | 0.36506800  | -0.08058000 |
| Rh                       | -2.74696400 | -0.52337000 | 0.19510700  |
| C                        | 2.65172800  | 0.48443100  | 0.64401700  |
| C                        | 2.79206000  | 0.45523800  | -0.82495500 |
| H                        | 2.31954600  | -0.41220600 | 1.15654600  |
| H                        | 3.31514900  | 1.13713200  | 1.20388800  |
| H                        | 3.52893100  | 1.15478300  | -1.21514400 |
| C                        | 2.63612100  | -0.79850300 | -1.64417100 |
| H                        | 2.28687400  | -0.57058900 | -2.65812800 |
| H                        | 3.62935300  | -1.25827900 | -1.70159000 |
| H                        | 1.93914700  | -1.50387400 | -1.18683000 |
| N                        | 1.60951200  | 1.13611000  | -0.19503800 |
| Br                       | 6.11617600  | 0.27545600  | 0.02727600  |
| C                        | 1.64365300  | 2.60531600  | -0.21875200 |
| H                        | 1.18135800  | 2.96309700  | -1.14314300 |
| H                        | 1.07721700  | 2.99209600  | 0.63393600  |
| H                        | 2.67802900  | 2.96867800  | -0.16177600 |
| <b>Rh-Ts<sub>1</sub></b> |             |             |             |
| O                        | -2.64622600 | -1.20531500 | -1.79329600 |
| O                        | -2.70807900 | 0.22079400  | 2.13011600  |
| O                        | -3.48189700 | 1.30578700  | -0.50960200 |
| O                        | -1.88824700 | -2.31097000 | 0.84397700  |
| O                        | 0.22851700  | -1.47960700 | 0.59211000  |
| O                        | -1.36257000 | 2.13582900  | -0.74705600 |
| O                        | -0.58348100 | 1.04003700  | 1.87605900  |
| O                        | -0.51497700 | -0.40427300 | -2.04088200 |

|                           |             |             |             |
|---------------------------|-------------|-------------|-------------|
| C                         | -1.57293500 | -0.98206200 | -2.42590800 |
| C                         | -1.65799600 | 0.81160800  | 2.50912000  |
| C                         | -2.62684500 | 2.18821900  | -0.80047600 |
| C                         | -0.62812500 | -2.36537600 | 0.88909600  |
| H                         | -1.55575000 | -1.35161200 | -3.46012500 |
| H                         | -0.20053900 | -3.31528700 | 1.23547700  |
| H                         | -3.02970900 | 3.14697600  | -1.15345200 |
| H                         | -1.67440400 | 1.18338300  | 3.54214200  |
| Rh                        | -0.44931200 | 0.37095700  | -0.09296600 |
| Rh                        | -2.78119200 | -0.53877500 | 0.18106300  |
| C                         | 2.73856004  | 1.00925234  | 0.64589787  |
| C                         | 3.31888519  | 0.94900653  | -0.71320918 |
| H                         | 2.51625300  | 0.03176860  | 1.07620419  |
| H                         | 3.24587100  | 1.66504610  | 1.35769594  |
| H                         | 3.70202912  | 1.87042256  | -1.12922385 |
| C                         | 3.09993156  | -0.21580193 | -1.63993374 |
| H                         | 2.22963623  | -0.04394365 | -2.28457351 |
| H                         | 3.98118008  | -0.34648012 | -2.27248145 |
| H                         | 2.93407238  | -1.13884807 | -1.07696107 |
| N                         | 1.60406940  | 1.59458704  | -0.04631955 |
| Br                        | 5.88193383  | 0.54584807  | -0.09919087 |
| C                         | 1.49601944  | 3.04226362  | 0.10573889  |
| H                         | 0.82471400  | 3.44903961  | -0.65511849 |
| H                         | 1.08097535  | 3.27128216  | 1.09790510  |
| H                         | 2.47885284  | 3.52974398  | 0.01994623  |
| <b>Rh-Int<sub>2</sub></b> |             |             |             |
| O                         | -2.62476900 | -1.20492100 | -1.77286100 |
| O                         | -2.69538400 | 0.22798200  | 2.14443200  |
| O                         | -3.46565200 | 1.31422300  | -0.49082800 |

|    |             |             |             |
|----|-------------|-------------|-------------|
| O  | -1.87556500 | -2.30234800 | 0.86114600  |
| O  | 0.24068200  | -1.46969400 | 0.60772900  |
| O  | -1.34686400 | 2.14469800  | -0.74083300 |
| O  | -0.57425400 | 1.05437300  | 1.89153200  |
| O  | -0.50232900 | -0.38155700 | -2.03448000 |
| C  | -1.55591000 | -0.97368100 | -2.40911800 |
| C  | -1.64707100 | 0.82065400  | 2.52479000  |
| C  | -2.61159300 | 2.19633700  | -0.78723200 |
| C  | -0.61506700 | -2.35634300 | 0.90550500  |
| H  | -1.54298700 | -1.34324300 | -3.44394800 |
| H  | -0.18777600 | -3.30691800 | 1.25165400  |
| H  | -3.01694600 | 3.15534500  | -1.13727500 |
| H  | -1.66164100 | 1.19175200  | 3.55831900  |
| Rh | -0.43051700 | 0.38673100  | -0.07755000 |
| Rh | -2.76450600 | -0.53163400 | 0.19707800  |
| C  | 2.59180200  | 0.47161100  | 0.29735600  |
| C  | 3.67649700  | 0.23695500  | -0.75885500 |
| H  | 2.25916000  | -0.49867500 | 0.67910400  |
| H  | 3.00361300  | 1.04127700  | 1.14950300  |
| H  | 3.98942100  | 1.17287300  | -1.22112400 |
| C  | 3.35489100  | -0.83548200 | -1.77968000 |
| H  | 2.40794600  | -0.56235800 | -2.26006900 |
| H  | 4.13895700  | -0.92047900 | -2.53998600 |
| H  | 3.22498500  | -1.80896700 | -1.29375100 |
| N  | 1.52252900  | 1.16516200  | -0.39930200 |
| Br | 5.48698900  | -0.32783400 | 0.20895900  |
| C  | 1.59379300  | 2.59545600  | -0.15795400 |
| H  | 0.81718300  | 3.11425300  | -0.72632600 |
| H  | 1.48208900  | 2.87020800  | 0.91224100  |

|                           |             |             |             |
|---------------------------|-------------|-------------|-------------|
| H                         | 2.57084300  | 2.99632200  | -0.48750000 |
| <b>Rh-Int<sub>3</sub></b> |             |             |             |
| O                         | -2.40176800 | -0.31849600 | -2.29670600 |
| O                         | -3.07313200 | -0.93264400 | 1.77582900  |
| O                         | -3.52230800 | 1.29709100  | -0.09971300 |
| O                         | -1.94958800 | -2.55469300 | -0.42519600 |
| O                         | 0.12328300  | -1.73988500 | 0.10012400  |
| O                         | -1.42862300 | 2.12849200  | 0.31094000  |
| O                         | -1.00168300 | -0.07513700 | 2.24374900  |
| O                         | -0.28743600 | 0.43305000  | -1.83607900 |
| C                         | -1.25732300 | 0.13442100  | -2.59241200 |
| C                         | -2.12784400 | -0.57860000 | 2.53561100  |
| C                         | -2.68278500 | 2.20904700  | 0.14121300  |
| C                         | -0.71062000 | -2.64626700 | -0.19963500 |
| H                         | -1.07661800 | 0.29513800  | -3.66450000 |
| H                         | -0.28144700 | -3.65418900 | -0.27159300 |
| H                         | -3.09834300 | 3.22315900  | 0.21749800  |
| H                         | -2.30308200 | -0.72609300 | 3.61045000  |
| Rh                        | -0.54103300 | 0.23360200  | 0.22993000  |
| Rh                        | -2.83308200 | -0.66762000 | -0.28484300 |
| C                         | 2.46729600  | 0.12322100  | 0.57565200  |
| C                         | 3.64917400  | 0.79233900  | -0.13615200 |
| H                         | 2.18684300  | -0.77224800 | 0.01255700  |
| H                         | 2.77006800  | -0.20810100 | 1.58484500  |
| H                         | 3.88723100  | 1.75906600  | 0.30645600  |
| C                         | 3.52897000  | 0.85661200  | -1.64594700 |
| H                         | 2.58163800  | 1.35118800  | -1.89066800 |
| H                         | 4.35816900  | 1.41093700  | -2.09711800 |
| H                         | 3.50051000  | -0.15005600 | -2.07685000 |

|                          |             |             |             |
|--------------------------|-------------|-------------|-------------|
| N                        | 1.37906600  | 1.08984900  | 0.59649800  |
| Br                       | 5.42295000  | -0.27713000 | 0.30922000  |
| C                        | 1.06083700  | 3.91904800  | -1.13742000 |
| O                        | 1.41070400  | 4.44173500  | -0.15032500 |
| O                        | 0.72486000  | 3.47478200  | -2.16429400 |
| C                        | 1.38050800  | 1.82261500  | 1.85518000  |
| H                        | 2.31869700  | 2.39391000  | 1.97556200  |
| H                        | 0.55934200  | 2.54486600  | 1.86906800  |
| H                        | 1.28070200  | 1.16648700  | 2.74163400  |
| <b>Rh-Ts<sub>2</sub></b> |             |             |             |
| O                        | -2.39692600 | -0.38668000 | -2.28793100 |
| O                        | -3.09564100 | -0.92515700 | 1.78672700  |
| O                        | -3.52338000 | 1.27435000  | -0.13681600 |
| O                        | -1.95724600 | -2.58062400 | -0.36726300 |
| O                        | 0.12858900  | -1.75394300 | 0.07453100  |
| O                        | -1.44663700 | 2.09514700  | 0.36349500  |
| O                        | -0.99900900 | -0.13958800 | 2.24697500  |
| O                        | -0.33023500 | 0.47314500  | -1.81803700 |
| C                        | -1.27459900 | 0.11779300  | -2.58158700 |
| C                        | -2.13718100 | -0.60912200 | 2.54595800  |
| C                        | -2.69253000 | 2.18353700  | 0.14950100  |
| C                        | -0.71116600 | -2.66782400 | -0.18355600 |
| H                        | -1.08413500 | 0.27009700  | -3.65298500 |
| H                        | -0.28896400 | -3.67923000 | -0.26007800 |
| H                        | -3.10586000 | 3.19811800  | 0.22901300  |
| H                        | -2.31059900 | -0.75113400 | 3.62196500  |
| Rh                       | -0.54624900 | 0.22098700  | 0.23875400  |
| Rh                       | -2.82902800 | -0.68761300 | -0.27196400 |
| C                        | 2.39580175  | 0.28216232  | 0.97176849  |



|    |            |             |             |
|----|------------|-------------|-------------|
| C  | 3.41674979 | -0.15406753 | -0.08680023 |
| H  | 1.94084463 | -0.61543778 | 1.41517316  |
| H  | 2.95560157 | 0.78154070  | 1.77417790  |
| H  | 3.92731250 | 0.69938390  | -0.52692097 |
| C  | 2.96557084 | -1.14387248 | -1.13427500 |
| H  | 2.12959236 | -0.69646399 | -1.68088263 |
| H  | 3.77291584 | -1.35965521 | -1.84234991 |
| H  | 2.62360113 | -2.07617666 | -0.67669931 |
| N  | 1.36254558 | 1.21296106  | 0.46855564  |
| Br | 5.00634038 | -1.04128672 | 0.97510202  |
| C  | 1.97490362 | 2.50948728  | -1.11915120 |
| O  | 2.61944314 | 3.31641704  | -0.52729990 |
| O  | 1.42769438 | 2.07197491  | -2.08173969 |
| C  | 1.04381268 | 2.16286645  | 1.54094317  |
| H  | 1.91939386 | 2.79324289  | 1.76325936  |
| H  | 0.23502848 | 2.82129623  | 1.22002810  |
| H  | 0.73936350 | 1.65678695  | 2.46935596  |

**Rh-Int<sub>4</sub>**

|   |             |             |             |
|---|-------------|-------------|-------------|
| O | 2.24000700  | -1.28274000 | -3.27545000 |
| O | -0.73172500 | 1.62845300  | -3.29570300 |
| O | 2.21842000  | 1.65830800  | -3.27557600 |
| O | -0.70681600 | -1.29835100 | -3.28813200 |
| O | -0.71075300 | -1.29340600 | -1.00222200 |
| O | 2.24493700  | 1.63972100  | -0.98943600 |
| O | -0.66975800 | 1.68555800  | -1.01161400 |
| O | 2.21603300  | -1.31557200 | -0.98992000 |
| C | 2.61407800  | -1.68212300 | -2.13197600 |
| C | -1.08735300 | 2.03839100  | -2.14798300 |
| C | 2.61623700  | 2.03285400  | -2.13190000 |

|                          |             |             |             |
|--------------------------|-------------|-------------|-------------|
| C                        | -1.09319700 | -1.67991800 | -2.14156900 |
| H                        | 3.39643700  | -2.45635900 | -2.13575500 |
| H                        | -1.87056300 | -2.45700000 | -2.13581300 |
| H                        | 3.39581000  | 2.80962500  | -2.13581100 |
| H                        | -1.87117700 | 2.80902400  | -2.13575000 |
| Rh                       | 0.75031300  | 0.17739700  | -0.89120800 |
| Rh                       | 0.75626100  | 0.17732000  | -3.36093700 |
| C                        | -0.91522700 | 0.62149200  | 4.28098200  |
| C                        | -2.17968100 | -0.25519900 | 4.28488800  |
| H                        | -1.22556600 | 1.63455700  | 3.97655400  |
| H                        | -0.50262200 | 0.69615500  | 5.28993400  |
| H                        | -2.09801300 | -1.05197400 | 3.55245000  |
| C                        | -3.48375800 | 0.50433300  | 4.16550100  |
| H                        | -3.47069800 | 1.00190200  | 3.18782000  |
| H                        | -4.34747200 | -0.16554000 | 4.21297100  |
| H                        | -3.58463300 | 1.26174000  | 4.95224400  |
| N                        | 0.12587300  | 0.12253600  | 3.39756500  |
| Br                       | -2.26113000 | -1.37433000 | 6.07221400  |
| C                        | -0.15622400 | 0.25834100  | 2.01176500  |
| O                        | -1.33922900 | 0.46061900  | 1.68847300  |
| O                        | 0.87628000  | 0.13798300  | 1.24485700  |
| C                        | 1.49816100  | 0.17607400  | 3.87627800  |
| H                        | 2.14344100  | -0.29958700 | 3.13744500  |
| H                        | 1.85796300  | 1.21040700  | 4.02630800  |
| H                        | 1.57898300  | -0.36212800 | 4.82920300  |
| <b>Rh-Ts<sub>3</sub></b> |             |             |             |
| O                        | 1.46229400  | -1.46182500 | -1.13833900 |
| O                        | -1.46229300 | 1.46183000  | -1.13833600 |
| O                        | 1.46190800  | 1.46220400  | -1.13839000 |

|    |             |             |             |
|----|-------------|-------------|-------------|
| O  | -1.46190900 | -1.46220500 | -1.13839000 |
| O  | -1.46192100 | -1.46220400 | 1.13832900  |
| O  | 1.46192000  | 1.46220100  | 1.13832900  |
| O  | -1.46227300 | 1.46184100  | 1.13838300  |
| O  | 1.46227600  | -1.46183800 | 1.13838000  |
| C  | 1.85720400  | -1.85650600 | 0.00001800  |
| C  | -1.85719300 | 1.85651800  | 0.00002200  |
| C  | 1.85675000  | 1.85695900  | -0.00002600 |
| C  | -1.85674600 | -1.85696700 | -0.00002600 |
| H  | 2.63381900  | -2.63267900 | 0.00002200  |
| H  | -2.63318100 | -2.63332000 | -0.00003600 |
| H  | 2.63319200  | 2.63330500  | -0.00003400 |
| H  | -2.63379500 | 2.63270400  | 0.00002700  |
| Rh | -0.00000100 | -0.00000100 | 1.20306600  |
| Rh | -0.00000200 | 0.00000000  | -1.20305800 |
| C  | 0.64525777  | -0.88824324 | 6.91905485  |
| C  | 1.34430146  | -2.16797540 | 6.50311320  |
| H  | -0.41494471 | -1.11648533 | 7.13709696  |
| H  | 1.09323657  | -0.49267298 | 7.83086402  |
| H  | 2.32081771  | -2.08413914 | 6.05637650  |
| C  | 0.63252161  | -3.49297311 | 6.52274375  |
| H  | -0.05667581 | -3.53357181 | 5.67188207  |
| H  | 1.34329736  | -4.31861036 | 6.45043141  |
| H  | 0.06240796  | -3.61181056 | 7.44912772  |
| N  | 0.76340822  | 0.11322583  | 5.86935833  |
| Br | 2.68747761  | -2.59759158 | 8.66449280  |
| C  | 0.59449181  | -0.40069490 | 4.58119585  |
| O  | 0.70048478  | -1.66459514 | 4.50723650  |
| O  | 0.37800173  | 0.40839896  | 3.63088737  |

|                           |             |             |             |
|---------------------------|-------------|-------------|-------------|
| C                         | 0.38467455  | 1.47514116  | 6.18677322  |
| H                         | 0.51523998  | 2.08588592  | 5.29239515  |
| H                         | -0.66944152 | 1.55062312  | 6.50878308  |
| H                         | 1.02056882  | 1.86294857  | 6.99267474  |
| <b>Rh-Int<sub>5</sub></b> |             |             |             |
| O                         | 2.22787400  | -1.29180900 | -3.27883400 |
| O                         | -0.70946800 | 1.64035000  | -3.28163000 |
| O                         | 2.22807000  | 1.64447200  | -3.27833700 |
| O                         | -0.70904900 | -1.28763700 | -3.28182200 |
| O                         | -0.69722800 | -1.29963500 | -0.99968800 |
| O                         | 2.23140400  | 1.64692300  | -0.99570900 |
| O                         | -0.69824400 | 1.65182700  | -0.99924100 |
| O                         | 2.23141100  | -1.29385700 | -0.99637700 |
| C                         | 2.61780200  | -1.68051400 | -2.13706500 |
| C                         | -1.09276400 | 2.03338900  | -2.13844300 |
| C                         | 2.61762000  | 2.03321400  | -2.13655500 |
| C                         | -1.09230800 | -1.68156900 | -2.13873200 |
| H                         | 3.39643700  | -2.45635900 | -2.13575500 |
| H                         | -1.87056300 | -2.45700000 | -2.13581300 |
| H                         | 3.39581000  | 2.80962500  | -2.13581100 |
| H                         | -1.87117700 | 2.80902400  | -2.13575000 |
| Rh                        | 0.75974500  | 0.17514900  | -0.90752600 |
| Rh                        | 0.75864200  | 0.17597700  | -3.35143600 |
| C                         | -0.93565400 | 0.21580800  | 4.26851700  |
| C                         | -1.99661300 | -0.04070600 | 3.19118300  |
| H                         | -0.97771900 | 1.24632300  | 4.65709200  |
| H                         | -1.05724400 | -0.48118000 | 5.10316000  |
| H                         | -2.28947000 | -1.09441600 | 3.20231300  |
| C                         | -3.21423100 | 0.85282800  | 3.23297000  |

|    |             |             |            |
|----|-------------|-------------|------------|
| H  | -2.92792400 | 1.91134100  | 3.18649900 |
| H  | -3.88575500 | 0.63049700  | 2.39587900 |
| H  | -3.73516600 | 0.64837900  | 4.17584300 |
| N  | 0.29637800  | 0.01271900  | 3.50200100 |
| Br | -3.24616100 | -1.34401400 | 6.36036700 |
| C  | 0.05588000  | 0.12288600  | 2.17666200 |
| O  | -1.25373900 | 0.17239500  | 1.92307700 |
| O  | 0.93642000  | 0.17556600  | 1.29722300 |
| C  | 1.61694900  | 0.10505000  | 4.08522000 |
| H  | 2.35910100  | -0.07761600 | 3.30536300 |
| H  | 1.78875800  | 1.10269300  | 4.51759000 |
| H  | 1.72359800  | -0.64275000 | 4.87904600 |

**Y-HKUST-1**

|   |             |             |             |
|---|-------------|-------------|-------------|
| O | -1.49911500 | -1.49387200 | 1.12624000  |
| O | 1.49892700  | 1.49449900  | 1.12589000  |
| O | -1.49413400 | 1.49931000  | 1.12595100  |
| O | 1.49422800  | -1.49875700 | 1.12635600  |
| O | 1.49367300  | -1.49966100 | -1.12579200 |
| O | -1.49386100 | 1.49907900  | -1.12620200 |
| O | 1.49955800  | 1.49339700  | -1.12626100 |
| O | -1.49922600 | -1.49410900 | -1.12591000 |
| C | -1.90820300 | -1.90109100 | 0.00022300  |
| C | 1.90813300  | 1.90119000  | -0.00025800 |
| C | -1.90125400 | 1.90806900  | -0.00020800 |
| C | 1.90122400  | -1.90806900 | 0.00032900  |
| H | -2.68735300 | -2.67771600 | 0.00034300  |
| H | 2.67745500  | -2.68761300 | 0.00046300  |
| H | -2.67760600 | 2.68749200  | -0.00038800 |
| H | 2.68790900  | 2.67718700  | -0.00043200 |

|                          |             |             |             |
|--------------------------|-------------|-------------|-------------|
| Y                        | -0.00000500 | -0.00017300 | -1.44390400 |
| Y                        | -0.00000500 | 0.00021800  | 1.44377700  |
| <b>Y-Int<sub>0</sub></b> |             |             |             |
| O                        | -1.59210600 | 1.59187700  | -1.12926100 |
| O                        | 1.59202800  | -1.59321000 | -1.12756900 |
| O                        | -1.59257200 | -1.59272100 | -1.12751700 |
| O                        | 1.59254400  | 1.59141500  | -1.12936700 |
| O                        | 1.59245900  | 1.59283600  | 1.12746300  |
| O                        | -1.59239800 | -1.59147500 | 1.12931900  |
| O                        | 1.59222300  | -1.59174400 | 1.12926500  |
| O                        | -1.59212200 | 1.59311000  | 1.12757100  |
| C                        | -1.99761900 | 1.99745600  | -0.00106800 |
| C                        | 1.99726900  | -1.99780000 | 0.00107500  |
| C                        | -1.99772600 | -1.99732200 | 0.00115400  |
| C                        | 1.99780600  | 1.99728900  | -0.00119000 |
| H                        | -2.77547300 | 2.77650000  | -0.00150600 |
| H                        | 2.77607800  | 2.77591600  | -0.00165700 |
| H                        | -2.77616200 | -2.77578400 | 0.00165200  |
| H                        | 2.77606300  | -2.77590300 | 0.00151900  |
| Y                        | 0.00004700  | 0.00091600  | 1.60465300  |
| Y                        | -0.00003000 | -0.00089400 | -1.60463000 |
| C                        | 0.58219324  | -1.62524108 | 4.12346050  |
| C                        | 1.14237446  | -0.34423224 | 4.65209481  |
| H                        | 1.12125968  | -2.18859742 | 3.36330631  |
| H                        | -0.02368783 | -2.23253857 | 4.79897030  |
| H                        | 0.86980554  | -0.11382791 | 5.68655719  |
| C                        | 2.47403947  | 0.21449224  | 4.20513619  |
| H                        | 2.48199699  | 1.30997998  | 4.27099161  |
| H                        | 3.28807365  | -0.17007716 | 4.83292737  |

|                          |             |             |             |
|--------------------------|-------------|-------------|-------------|
| H                        | 2.67684608  | -0.06230177 | 3.16514901  |
| N                        | 0.04012546  | -0.33530729 | 3.69229564  |
| C                        | -1.27992203 | 0.01718540  | 4.20172302  |
| H                        | -1.39381277 | 1.10705791  | 4.18420882  |
| H                        | -2.04585905 | -0.41956688 | 3.55078827  |
| H                        | -1.45981617 | -0.33538098 | 5.23444065  |
| <b>Y-Int<sub>0</sub></b> |             |             |             |
| O                        | -1.59210600 | 1.59187700  | -1.12926100 |
| O                        | 1.59202800  | -1.59321000 | -1.12756900 |
| O                        | -1.59257200 | -1.59272100 | -1.12751700 |
| O                        | 1.59254400  | 1.59141500  | -1.12936700 |
| O                        | 1.59245900  | 1.59283600  | 1.12746300  |
| O                        | -1.59239800 | -1.59147500 | 1.12931900  |
| O                        | 1.59222300  | -1.59174400 | 1.12926500  |
| O                        | -1.59212200 | 1.59311000  | 1.12757100  |
| C                        | -1.99761900 | 1.99745600  | -0.00106800 |
| C                        | 1.99726900  | -1.99780000 | 0.00107500  |
| C                        | -1.99772600 | -1.99732200 | 0.00115400  |
| C                        | 1.99780600  | 1.99728900  | -0.00119000 |
| H                        | -2.77547300 | 2.77650000  | -0.00150600 |
| H                        | 2.77607800  | 2.77591600  | -0.00165700 |
| H                        | -2.77616200 | -2.77578400 | 0.00165200  |
| H                        | 2.77606300  | -2.77590300 | 0.00151900  |
| Y                        | 0.00004700  | 0.00091600  | 1.60465300  |
| Y                        | -0.00003000 | -0.00089400 | -1.60463000 |
| C                        | 0.58219324  | -1.62524108 | 4.12346050  |
| C                        | 1.14237446  | -0.34423224 | 4.65209481  |
| H                        | 1.12125968  | -2.18859742 | 3.36330631  |
| H                        | -0.02368783 | -2.23253857 | 4.79897030  |

|                          |             |             |             |
|--------------------------|-------------|-------------|-------------|
| H                        | 0.86980554  | -0.11382791 | 5.68655719  |
| C                        | 2.47403947  | 0.21449224  | 4.20513619  |
| H                        | 2.48199699  | 1.30997998  | 4.27099161  |
| H                        | 3.28807365  | -0.17007716 | 4.83292737  |
| H                        | 2.67684608  | -0.06230177 | 3.16514901  |
| N                        | 0.04012546  | -0.33530729 | 3.69229564  |
| C                        | -1.27992203 | 0.01718540  | 4.20172302  |
| H                        | -1.39381277 | 1.10705791  | 4.18420882  |
| H                        | -2.04585905 | -0.41956688 | 3.55078827  |
| H                        | -1.45981617 | -0.33538098 | 5.23444065  |
| <b>Y-Int<sub>1</sub></b> |             |             |             |
| O                        | -2.65159700 | 1.83253100  | 1.61362800  |
| O                        | -3.33575800 | -1.01455100 | -1.83878300 |
| O                        | -3.61149900 | -1.21290600 | 1.31370100  |
| O                        | -2.36420500 | 2.03526500  | -1.58110100 |
| O                        | -0.23630600 | 1.26160300  | -1.49846200 |
| O                        | -1.47326900 | -1.94351500 | 1.44410200  |
| O                        | -1.20288800 | -1.75534000 | -1.68480100 |
| O                        | -0.52620400 | 1.06765900  | 1.79363300  |
| C                        | -1.49277900 | 1.80931700  | 2.12136400  |
| C                        | -2.36064900 | -1.72789700 | -2.19994800 |
| C                        | -2.70413100 | -1.97347900 | 1.74680800  |
| C                        | -1.13757000 | 2.05697700  | -1.88940100 |
| H                        | -1.30646300 | 2.51446600  | 2.94556600  |
| H                        | -0.81543000 | 2.85573700  | -2.57368600 |
| H                        | -3.01797200 | -2.74582800 | 2.46814300  |
| H                        | -2.52671800 | -2.40407900 | -3.05173700 |
| Y                        | -0.36007400 | -0.47896800 | 0.03598400  |
| Y                        | -3.45913400 | 0.58996600  | -0.15259300 |



|                         |             |             |             |
|-------------------------|-------------|-------------|-------------|
| C                       | 2.59229300  | -0.80192900 | 1.69424800  |
| C                       | 3.14096700  | -1.01903300 | 0.33144000  |
| H                       | 1.89620700  | -1.52402200 | 2.13245200  |
| H                       | 3.19504100  | -0.26132600 | 2.42227300  |
| H                       | 4.12772600  | -0.57998400 | 0.13147600  |
| C                       | 2.81499700  | -2.24251700 | -0.49213000 |
| H                       | 2.70705200  | -1.96973800 | -1.55374100 |
| H                       | 3.64211000  | -2.95348800 | -0.43630700 |
| H                       | 1.89773400  | -2.75437500 | -0.16728800 |
| N                       | 2.06203400  | -0.01115200 | 0.55882900  |
| Br                      | 6.27912300  | 0.37725700  | -0.30450000 |
| C                       | 2.52473000  | 1.39382500  | 0.51961500  |
| H                       | 2.41297400  | 1.76407800  | -0.50286500 |
| H                       | 1.89765100  | 1.98747500  | 1.19298100  |
| H                       | 3.58232000  | 1.47866400  | 0.79886600  |
| <b>Y-Ts<sub>1</sub></b> |             |             |             |
| O                       | -1.59210600 | 1.59187700  | -1.12926100 |
| O                       | 1.59202800  | -1.59321000 | -1.12756900 |
| O                       | -1.59257200 | -1.59272100 | -1.12751700 |
| O                       | 1.59254400  | 1.59141500  | -1.12936700 |
| O                       | 1.59245900  | 1.59283600  | 1.12746300  |
| O                       | -1.59239800 | -1.59147500 | 1.12931900  |
| O                       | 1.59222300  | -1.59174400 | 1.12926500  |
| O                       | -1.59212200 | 1.59311000  | 1.12757100  |
| C                       | -1.99761900 | 1.99745600  | -0.00106800 |
| C                       | 1.99726900  | -1.99780000 | 0.00107500  |
| C                       | -1.99772600 | -1.99732200 | 0.00115400  |
| C                       | 1.99780600  | 1.99728900  | -0.00119000 |
| H                       | -2.77547300 | 2.77650000  | -0.00150600 |

|    |             |             |             |
|----|-------------|-------------|-------------|
| H  | 2.77607800  | 2.77591600  | -0.00165700 |
| H  | -2.77616200 | -2.77578400 | 0.00165200  |
| H  | 2.77606300  | -2.77590300 | 0.00151900  |
| Y  | 0.00004700  | 0.00091600  | 1.60465300  |
| Y  | -0.00003000 | -0.00089400 | -1.60463000 |
| C  | -1.17431222 | -0.23228312 | 4.85067767  |
| C  | -0.01817136 | -1.02388428 | 5.32426476  |
| H  | -1.90763837 | -0.80466068 | 4.28087501  |
| H  | -1.64738159 | 0.42781421  | 5.58181600  |
| H  | 0.66089870  | -0.54380670 | 6.01510797  |
| C  | 0.42672483  | -2.29481945 | 4.65319915  |
| H  | 1.19069628  | -2.08896487 | 3.89393557  |
| H  | 0.85138595  | -2.96974188 | 5.40014961  |
| H  | -0.41482832 | -2.79680004 | 4.16712770  |
| N  | -0.14466512 | 0.36988480  | 4.02238343  |
| Br | -1.04837795 | -2.04577018 | 7.56104753  |
| C  | 0.29062036  | 1.68686555  | 4.47697368  |
| H  | 1.24281661  | 1.94840078  | 4.00799257  |
| H  | -0.46042047 | 2.43568142  | 4.18659919  |
| H  | 0.40517845  | 1.71667852  | 5.5710242   |

**Y-Int<sub>2</sub>**

|   |             |             |             |
|---|-------------|-------------|-------------|
| O | -1.71520500 | 1.66933300  | -2.99719000 |
| O | 1.56753900  | -1.40258500 | -2.98774000 |
| O | -1.71698000 | -1.40570500 | -2.99461400 |
| O | 1.57054200  | 1.67210500  | -2.99995800 |
| O | 1.52145200  | 1.72710400  | -0.73737300 |
| O | -1.66323100 | -1.46429800 | -0.73258800 |
| O | 1.53334400  | -1.46268200 | -0.72474100 |
| O | -1.67043700 | 1.73103900  | -0.73460100 |

|                          |             |             |             |
|--------------------------|-------------|-------------|-------------|
| C                        | -2.08908100 | 2.10410300  | -1.87143500 |
| C                        | 1.94593300  | -1.83737400 | -1.86386500 |
| C                        | -2.08826200 | -1.83947300 | -1.86852800 |
| C                        | 1.94341200  | 2.10352200  | -1.87335200 |
| H                        | -2.84808600 | 2.90872800  | -1.87353900 |
| H                        | 2.70346500  | 2.90814400  | -1.87369000 |
| H                        | -2.84877500 | -2.64355600 | -1.87038100 |
| H                        | 2.70345000  | -2.64367500 | -1.87051400 |
| Y                        | -0.07691200 | 0.13444100  | -0.16404700 |
| Y                        | -0.07299100 | 0.13232800  | -3.59076300 |
| C                        | -0.46058700 | -0.82341900 | 3.03870400  |
| C                        | 0.75392500  | -1.47382900 | 3.72215600  |
| H                        | -1.02615800 | -1.61510900 | 2.52396000  |
| H                        | -1.12906000 | -0.40416900 | 3.81209200  |
| H                        | 1.40162100  | -0.71974600 | 4.16930700  |
| C                        | 1.52861800  | -2.45666400 | 2.86775300  |
| H                        | 1.87189600  | -1.94388000 | 1.96128300  |
| H                        | 2.40069300  | -2.85377700 | 3.39737100  |
| H                        | 0.89311000  | -3.29558600 | 2.56153000  |
| N                        | -0.03798500 | 0.19131700  | 2.09585700  |
| Br                       | 0.10810300  | -2.49829400 | 5.44500200  |
| C                        | 0.26138000  | 1.46299900  | 2.73818800  |
| H                        | 0.49955700  | 2.22441900  | 1.98140600  |
| H                        | -0.59641500 | 1.84503200  | 3.32756400  |
| H                        | 1.13047700  | 1.43143000  | 3.42357500  |
| <b>Y-Int<sub>3</sub></b> |             |             |             |
| O                        | -1.36212700 | 1.90248100  | -3.02957700 |
| O                        | 2.32871500  | -0.68217400 | -2.97585700 |
| O                        | -0.78622100 | -1.26765800 | -3.07764000 |

|    |             |             |             |
|----|-------------|-------------|-------------|
| O  | 1.77067000  | 2.45467100  | -2.94931200 |
| O  | 1.82929400  | 2.43740800  | -0.68526100 |
| O  | -0.82509600 | -1.25037000 | -0.80964100 |
| O  | 2.36670600  | -0.72655900 | -0.70948100 |
| O  | -1.28843200 | 2.00231800  | -0.76570300 |
| C  | -1.78989200 | 2.25983800  | -1.89659300 |
| C  | 2.80128500  | -1.02931000 | -1.85937200 |
| C  | -1.12884200 | -1.71179200 | -1.94556600 |
| C  | 2.12253500  | 2.90392000  | -1.82586300 |
| H  | -2.71088300 | 2.86481200  | -1.88925800 |
| H  | 2.76050900  | 3.80311600  | -1.83294600 |
| H  | -1.77197500 | -2.60719600 | -1.94799600 |
| H  | 3.70000300  | -1.66832000 | -1.89165500 |
| Y  | 0.49402700  | 0.60459800  | -0.19210700 |
| Y  | 0.48644000  | 0.60371100  | -3.57053700 |
| C  | -1.19913800 | -0.60502500 | 2.45344200  |
| C  | -0.70362100 | -1.73531200 | 3.36610100  |
| H  | -1.72178200 | -1.06055800 | 1.60229800  |
| H  | -1.93729800 | 0.00374100  | 3.00587800  |
| H  | -0.11481900 | -1.35093600 | 4.19668700  |
| C  | -0.01472100 | -2.88184700 | 2.65685000  |
| H  | 0.87797100  | -2.49038600 | 2.15320900  |
| H  | 0.29404100  | -3.66812000 | 3.35484800  |
| H  | -0.67213400 | -3.31656100 | 1.89352500  |
| N  | -0.09373900 | 0.21213700  | 1.98015300  |
| Br | -2.35565300 | -2.53499300 | 4.41022300  |
| C  | 3.46568800  | -0.35505800 | 2.59564800  |
| O  | 3.39591400  | -1.37778500 | 3.16116100  |
| O  | 3.56408400  | 0.67449200  | 2.05177700  |

|                         |             |             |             |
|-------------------------|-------------|-------------|-------------|
| C                       | 0.29136000  | 1.22339500  | 2.94955400  |
| H                       | 0.77788700  | 0.82344000  | 3.86074900  |
| H                       | 1.01403700  | 1.92767600  | 2.51131300  |
| H                       | -0.57091300 | 1.82306500  | 3.29782200  |
| <b>Y-Ts<sub>2</sub></b> |             |             |             |
| O                       | -1.82928617 | 1.31390621  | -1.12758345 |
| O                       | 1.84781305  | -1.28656118 | -1.12900616 |
| O                       | -1.29083032 | -1.82465928 | -1.16134178 |
| O                       | 1.30940235  | 1.85204007  | -1.09530101 |
| O                       | 1.29070904  | 1.82474899  | 1.16128700  |
| O                       | -1.30923882 | -1.85207909 | 1.09525291  |
| O                       | 1.82938804  | -1.31376060 | 1.12758920  |
| O                       | -1.84787969 | 1.28644151  | 1.12900517  |
| C                       | -2.30675550 | 1.63069375  | 0.00087712  |
| C                       | 2.30647782  | -1.63109724 | -0.00087844 |
| C                       | -1.63084303 | -2.30626048 | -0.04143036 |
| C                       | 1.63093685  | 2.30623675  | 0.04139388  |
| H                       | -3.20519806 | 2.26690712  | 0.00121069  |
| H                       | 2.26619416  | 3.20521147  | 0.05752239  |
| H                       | -2.26629015 | -3.20510072 | -0.05752769 |
| H                       | 3.20568749  | -2.26622435 | -0.00118596 |
| Y                       | -0.01316493 | -0.01948194 | 1.60448052  |
| Y                       | 0.01318688  | 0.01950101  | -1.60445802 |
| C                       | -1.29980536 | -0.31584378 | 4.79691211  |
| C                       | -0.81748945 | -1.68081825 | 5.29694428  |
| H                       | -2.19120147 | -0.45710260 | 4.16713856  |
| H                       | -1.60504220 | 0.28709548  | 5.66365629  |
| H                       | -0.02618652 | -1.57385935 | 6.03737112  |
| C                       | -0.44916645 | -2.68842798 | 4.22968714  |

|    |             |             |            |
|----|-------------|-------------|------------|
| H  | 0.43003704  | -2.31446049 | 3.69033547 |
| H  | -0.18278683 | -3.65323178 | 4.67281330 |
| H  | -1.26169766 | -2.82783246 | 3.51113138 |
| N  | -0.25015076 | 0.38779464  | 4.05065358 |
| Br | -2.35850709 | -2.46165281 | 6.45240637 |
| C  | 1.67816525  | 0.80565905  | 4.76967146 |
| O  | 1.68161180  | 1.37285119  | 5.82140788 |
| O  | 2.14117696  | 0.05340724  | 3.96670367 |
| C  | -0.63437123 | 1.80584710  | 4.00164483 |
| H  | -0.76858697 | 2.17362907  | 4.99744729 |
| H  | 0.13543482  | 2.36733149  | 3.51478356 |
| H  | -1.54963217 | 1.90876811  | 3.45703058 |

**Y-Int<sub>4</sub>**

|   |            |             |             |
|---|------------|-------------|-------------|
| O | 3.51494600 | 2.21765600  | 0.06133700  |
| O | 4.15675000 | -2.24531800 | 0.46709800  |
| O | 3.93676500 | -0.24239700 | -1.99289100 |
| O | 3.72978000 | 0.21766900  | 2.50958600  |
| O | 1.49658600 | -0.16340500 | 2.44064400  |
| O | 1.69570900 | -0.57682500 | -2.05624700 |
| O | 1.91701600 | -2.57224300 | 0.39736400  |
| O | 1.27351700 | 1.88627600  | -0.01990800 |
| C | 2.31685500 | 2.60207400  | -0.03046600 |
| C | 3.11941400 | -2.96184500 | 0.48259300  |
| C | 2.84019600 | -0.44946300 | -2.58227000 |
| C | 2.59179800 | 0.07400700  | 3.03248300  |
| H | 2.15846600 | 3.68897100  | -0.13731800 |
| H | 2.54582500 | 0.16121100  | 4.13170800  |
| H | 2.87693500 | -0.52280900 | -3.68310100 |
| H | 3.26426200 | -4.05064700 | 0.58674000  |

|                         |             |             |             |
|-------------------------|-------------|-------------|-------------|
| Y                       | 1.05657800  | -0.43908400 | 0.18095700  |
| Y                       | 4.38096800  | 0.07200800  | 0.26943700  |
| C                       | -4.57407600 | 0.80941300  | 0.28031400  |
| C                       | -5.30413500 | 0.40655900  | -1.00501800 |
| H                       | -4.90452200 | 1.80599200  | 0.59545100  |
| H                       | -4.82395100 | 0.09334000  | 1.06868600  |
| H                       | -5.07781200 | -0.63164000 | -1.24394300 |
| C                       | -5.10787400 | 1.33181000  | -2.19054600 |
| H                       | -4.04021900 | 1.35210600  | -2.44367800 |
| H                       | -5.66097500 | 0.97953600  | -3.06646100 |
| H                       | -5.43240400 | 2.35336800  | -1.96103500 |
| N                       | -3.13153700 | 0.84406900  | 0.07863000  |
| Br                      | -7.32783000 | 0.33212400  | -0.56177500 |
| C                       | -2.43595400 | -0.37354200 | 0.13070000  |
| O                       | -3.07556900 | -1.43094800 | 0.19561000  |
| O                       | -1.13586200 | -0.27501400 | 0.08919900  |
| C                       | -2.46619300 | 2.13787900  | 0.12115200  |
| H                       | -1.40527500 | 2.01031100  | -0.08905700 |
| H                       | -2.89511300 | 2.81757900  | -0.62814300 |
| H                       | -2.57047300 | 2.61257500  | 1.11090200  |
| <b>Y-Ts<sub>3</sub></b> |             |             |             |
| O                       | 3.58164900  | 2.37304500  | -0.12739300 |
| O                       | 4.21863400  | -2.09348700 | 0.28360100  |
| O                       | 3.99216400  | -0.06012800 | -2.17874500 |
| O                       | 3.81808000  | 0.33661400  | 2.33545900  |
| O                       | 1.57845500  | -0.02498000 | 2.26960100  |
| O                       | 1.75662700  | -0.41061600 | -2.22551900 |
| O                       | 1.97947800  | -2.41494400 | 0.20393700  |
| O                       | 1.33656200  | 2.04561100  | -0.20900000 |

|    |             |             |             |
|----|-------------|-------------|-------------|
| C  | 2.38215600  | 2.75960700  | -0.21549800 |
| C  | 3.18150200  | -2.80705600 | 0.30184400  |
| C  | 2.89934600  | -0.27810100 | -2.76281500 |
| C  | 2.67322900  | 0.21138100  | 2.85744200  |
| H  | 2.22369400  | 3.84392700  | -0.32197900 |
| H  | 2.61105300  | 0.31616700  | 3.94704700  |
| H  | 2.94216300  | -0.36785300 | -3.86776200 |
| H  | 3.32949000  | -3.89569100 | 0.40207900  |
| Y  | 1.14670300  | -0.27362400 | 0.01131800  |
| Y  | 4.43976100  | 0.22451600  | 0.09101600  |
| C  | -4.55087900 | 0.72394200  | -0.54486500 |
| C  | -5.00623700 | -0.65086800 | -0.07158200 |
| H  | -4.80474700 | 0.84638600  | -1.61063800 |
| H  | -5.08295700 | 1.49893600  | 0.00948100  |
| H  | -5.00334900 | -0.85270200 | 0.98660500  |
| C  | -5.45667600 | -1.70914200 | -1.04671700 |
| H  | -4.58069300 | -2.14572900 | -1.54001700 |
| H  | -6.00636500 | -2.50107200 | -0.53284200 |
| H  | -6.11371700 | -1.27626100 | -1.80585500 |
| N  | -3.11390900 | 0.90833700  | -0.33946400 |
| Br | -7.45013600 | 0.13094000  | 0.47280900  |
| C  | -2.37171000 | -0.22600700 | -0.14767300 |
| O  | -3.02851700 | -1.30049700 | -0.01028200 |
| O  | -1.09299400 | -0.14143000 | -0.10286400 |
| C  | -2.54475900 | 2.20773500  | -0.63710800 |
| H  | -1.48091700 | 2.20074800  | -0.39723200 |
| H  | -2.66681800 | 2.46339100  | -1.70175000 |
| H  | -3.04373800 | 2.98126800  | -0.03877500 |



**Y-Int<sub>5</sub>**

|   |             |             |             |
|---|-------------|-------------|-------------|
| O | 3.51051300  | 2.21695600  | 0.05368500  |
| O | 4.15326600  | -2.24369000 | 0.48542200  |
| O | 3.94554200  | -0.22469600 | -2.00220500 |
| O | 3.72747700  | 0.18506000  | 2.50640800  |
| O | 1.49466800  | -0.18081800 | 2.44379900  |
| O | 1.71149200  | -0.60693900 | -2.04894600 |
| O | 1.91523500  | -2.56957100 | 0.43629300  |
| O | 1.26725300  | 1.89385500  | 0.04344300  |
| C | 2.31128500  | 2.60562300  | -0.01318000 |
| C | 3.11814600  | -2.96263200 | 0.50361100  |
| C | 2.84563600  | -0.45230900 | -2.58403400 |
| C | 2.59164600  | 0.05652000  | 3.03598700  |
| H | 2.15846600  | 3.68897100  | -0.13731800 |
| H | 2.54582500  | 0.16121100  | 4.13170800  |
| H | 2.87693500  | -0.52280900 | -3.68310100 |
| H | 3.26426200  | -4.05064700 | 0.58674000  |
| Y | 1.08384800  | -0.44221500 | 0.19737000  |
| Y | 4.34241100  | 0.06968200  | 0.25268900  |
| C | -4.24954800 | 1.26326000  | -1.36207900 |
| C | -4.50603900 | -0.24984800 | -1.29475100 |
| H | -4.26254100 | 1.64689000  | -2.39433900 |
| H | -4.99627700 | 1.80083900  | -0.76954300 |
| H | -5.05060900 | -0.49082700 | -0.38016400 |
| C | -5.18992700 | -0.86352400 | -2.49603500 |
| H | -4.65377400 | -0.63076900 | -3.42364300 |
| H | -5.25608500 | -1.95242100 | -2.38439900 |
| H | -6.20563200 | -0.45314500 | -2.53543000 |
| N | -2.89067700 | 1.35424700  | -0.81336000 |

|    |             |             |             |
|----|-------------|-------------|-------------|
| Br | -7.57348300 | 1.14918000  | -0.34565700 |
| C  | -2.30083600 | 0.14980700  | -0.78684400 |
| O  | -3.14043600 | -0.82337900 | -1.14098900 |
| O  | -1.11640300 | -0.09585700 | -0.46662500 |
| C  | -2.21163300 | 2.61500700  | -0.58741900 |
| H  | -1.18144500 | 2.42739700  | -0.27987600 |
| H  | -2.20597500 | 3.20929100  | -1.51070800 |
| H  | -2.73465300 | 3.18528000  | 0.18899800  |

**V-HKUST-1**

|   |             |             |             |
|---|-------------|-------------|-------------|
| V | 0.00009800  | 0.00002700  | -1.29144900 |
| V | -0.00010400 | -0.00002600 | 1.29145000  |
| O | -0.00274900 | 2.02630000  | -1.12197800 |
| O | 0.00292700  | -2.02625400 | -1.12206000 |
| O | -2.05682600 | -0.00279800 | -1.12900300 |
| O | 2.05699200  | 0.00284100  | -1.12869900 |
| O | 2.05682000  | 0.00276300  | 1.12899100  |
| O | -2.05699600 | -0.00280800 | 1.12868700  |
| O | 0.00272600  | -2.02629900 | 1.12198800  |
| O | -0.00288500 | 2.02625500  | 1.12207100  |
| C | -0.00345000 | 2.61161200  | 0.00005800  |
| C | 0.00346200  | -2.61161100 | -0.00004800 |
| C | -2.62896600 | -0.00338300 | -0.00020200 |
| C | 2.62896100  | 0.00337900  | 0.00019000  |
| H | -0.00505200 | 3.70939300  | 0.00008100  |
| H | 3.72867800  | 0.00506100  | 0.00027500  |
| H | -3.72868300 | -0.00505600 | -0.00028600 |
| H | 0.00507500  | -3.70939200 | -0.00007000 |

**V-Int<sub>0</sub>**

|   |            |            |             |
|---|------------|------------|-------------|
| V | 0.00009800 | 0.00002700 | -1.29549400 |
|---|------------|------------|-------------|

|   |             |             |             |
|---|-------------|-------------|-------------|
| V | -0.00010200 | -0.00002600 | 1.29549600  |
| O | -0.00128100 | 2.03527700  | -1.12227000 |
| O | 0.00145900  | -2.03523100 | -1.12235200 |
| O | -2.06617000 | -0.00134500 | -1.12908700 |
| O | 2.06634000  | 0.00139000  | -1.12878100 |
| O | 2.06616600  | 0.00131400  | 1.12908100  |
| O | -2.06634000 | -0.00136000 | 1.12877500  |
| O | 0.00125800  | -2.03527400 | 1.12227400  |
| O | -0.00142300 | 2.03523000  | 1.12235700  |
| C | -0.00161000 | 2.62186400  | 0.00005600  |
| C | 0.00161500  | -2.62186400 | -0.00005100 |
| C | -2.64047100 | -0.00154900 | -0.00020000 |
| C | 2.64046900  | 0.00154500  | 0.00019400  |
| H | -0.00245100 | 3.71941100  | 0.00007900  |
| H | 3.73974200  | 0.00252300  | 0.00027900  |
| H | -3.73974400 | -0.00251700 | -0.00028200 |
| H | 0.00246100  | -3.71941000 | -0.00007200 |
| C | -0.48118066 | 1.09948201  | -3.80741641 |
| C | 0.86442733  | 0.69485959  | -4.31718176 |
| H | -0.56927712 | 1.85437008  | -3.02755718 |
| H | -1.32149358 | 1.06090763  | -4.50354989 |
| H | 0.88268764  | 0.36718650  | -5.36111150 |
| C | 2.14981048  | 1.31859043  | -3.82319111 |
| H | 2.98247960  | 0.60678266  | -3.89016503 |
| H | 2.40856169  | 2.20217237  | -4.42068404 |
| H | 2.05064770  | 1.62402162  | -2.77619670 |
| N | 0.12569344  | -0.16842588 | -3.39780294 |
| C | -0.46362641 | -1.38025020 | -3.95500726 |
| H | 0.28291808  | -2.18251476 | -3.94305627 |

|                          |             |             |             |
|--------------------------|-------------|-------------|-------------|
| H                        | -1.31056586 | -1.68869788 | -3.33156384 |
| H                        | -0.82409563 | -1.25518041 | -4.99307766 |
| <b>V-Int<sub>1</sub></b> |             |             |             |
| V                        | 0.62119000  | 0.42404100  | -3.21747000 |
| V                        | 0.63757400  | 0.45776000  | -0.35797900 |
| O                        | 0.61630300  | 2.56318300  | -3.17962200 |
| O                        | 0.61477000  | -1.68482600 | -3.17982200 |
| O                        | -1.45595200 | 0.43220700  | -3.06415600 |
| O                        | 2.68888000  | 0.43752400  | -2.97995800 |
| O                        | 2.75774100  | 0.46749300  | -0.70757900 |
| O                        | -1.43315300 | 0.51489400  | -0.79706700 |
| O                        | 0.69346500  | -1.53496000 | -0.93092500 |
| O                        | 0.69339500  | 2.40035800  | -0.94256200 |
| C                        | 0.64685700  | 3.06114200  | -2.02511700 |
| C                        | 0.64990300  | -2.17836400 | -2.01772100 |
| C                        | -2.00368900 | 0.46353100  | -1.92409100 |
| C                        | 3.27816100  | 0.44950000  | -1.85894200 |
| H                        | 0.63563600  | 4.16058200  | -1.91684400 |
| H                        | 4.37782900  | 0.44369400  | -1.91664400 |
| H                        | -3.10165700 | 0.43865400  | -1.91720500 |
| H                        | 0.64054800  | -3.27823900 | -1.91699500 |
| C                        | -0.62545900 | 0.34557300  | 2.47325500  |
| C                        | -0.52526300 | -1.11416700 | 2.32454500  |
| H                        | -1.35557500 | 0.88835200  | 1.87762700  |
| H                        | -0.38985400 | 0.77139500  | 3.44435200  |
| H                        | -0.16314700 | -1.61414100 | 3.22044000  |
| C                        | -1.47838400 | -1.93648600 | 1.49962700  |
| H                        | -0.99735300 | -2.85334800 | 1.13824800  |
| H                        | -2.30847400 | -2.20619200 | 2.16261800  |

|                         |             |             |             |
|-------------------------|-------------|-------------|-------------|
| H                       | -1.86256400 | -1.37990900 | 0.64229100  |
| N                       | 0.51357000  | -0.23531900 | 1.67916900  |
| Br                      | -2.22812800 | -1.15736600 | 5.29014900  |
| C                       | 1.82239100  | -0.24468600 | 2.35596600  |
| H                       | 2.42346900  | -1.06542100 | 1.95209400  |
| H                       | 2.34914000  | 0.69750800  | 2.16546900  |
| H                       | 1.70950800  | -0.37657500 | 3.43988200  |
| <b>V-Ts<sub>1</sub></b> |             |             |             |
| V                       | 0.00009800  | 0.00002700  | -1.29549400 |
| V                       | -0.00010200 | -0.00002600 | 1.29549600  |
| O                       | -0.00128100 | 2.03527700  | -1.12227000 |
| O                       | 0.00145900  | -2.03523100 | -1.12235200 |
| O                       | -2.06617000 | -0.00134500 | -1.12908700 |
| O                       | 2.06634000  | 0.00139000  | -1.12878100 |
| O                       | 2.06616600  | 0.00131400  | 1.12908100  |
| O                       | -2.06634000 | -0.00136000 | 1.12877500  |
| O                       | 0.00125800  | -2.03527400 | 1.12227400  |
| O                       | -0.00142300 | 2.03523000  | 1.12235700  |
| C                       | -0.00161000 | 2.62186400  | 0.00005600  |
| C                       | 0.00161500  | -2.62186400 | -0.00005100 |
| C                       | -2.64047100 | -0.00154900 | -0.00020000 |
| C                       | 2.64046900  | 0.00154500  | 0.00019400  |
| H                       | -0.00245100 | 3.71941100  | 0.00007900  |
| H                       | 3.73974200  | 0.00252300  | 0.00027900  |
| H                       | -3.73974400 | -0.00251700 | -0.00028200 |
| H                       | 0.00246100  | -3.71941000 | -0.00007200 |
| C                       | -0.60160803 | 0.39446040  | 4.32476084  |
| C                       | -0.62580655 | -1.01709907 | 4.76577458  |
| H                       | -1.47513923 | 0.69974234  | 3.74700261  |

|                          |             |             |             |
|--------------------------|-------------|-------------|-------------|
| H                        | -0.32775074 | 1.13739955  | 5.07784115  |
| H                        | 0.13881135  | -1.33125196 | 5.46258332  |
| C                        | -1.42422514 | -2.07693807 | 4.05668579  |
| H                        | -0.81604525 | -2.58063352 | 3.29581932  |
| H                        | -1.76219212 | -2.82171566 | 4.78116974  |
| H                        | -2.30072957 | -1.64450971 | 3.56555712  |
| N                        | 0.48479094  | -0.10867684 | 3.50290872  |
| Br                       | -2.08523694 | -0.77867061 | 6.98433005  |
| C                        | 1.81389507  | 0.24971104  | 3.98829966  |
| H                        | 2.56800072  | -0.38626717 | 3.51726032  |
| H                        | 2.02437752  | 1.29644849  | 3.72534957  |
| H                        | 1.88386444  | 0.14591856  | 5.08159302  |
| <b>V-Int<sub>2</sub></b> |             |             |             |
| V                        | 0.63922700  | 0.44405600  | -3.23640500 |
| V                        | 0.63125000  | 0.44145400  | -0.42657200 |
| O                        | 0.64510400  | 2.57304400  | -3.16693700 |
| O                        | 0.63377300  | -1.68862700 | -3.16538700 |
| O                        | -1.45478700 | 0.44695200  | -3.04405600 |
| O                        | 2.73170200  | 0.43637200  | -3.04250200 |
| O                        | 2.73574600  | 0.46444000  | -0.76394400 |
| O                        | -1.46030300 | 0.41174100  | -0.76604700 |
| O                        | 0.66325000  | -1.55632100 | -0.90671900 |
| O                        | 0.61524200  | 2.43720600  | -0.90780700 |
| C                        | 0.63243300  | 3.06349000  | -2.00870000 |
| C                        | 0.64559600  | -2.18155400 | -2.00970500 |
| C                        | -2.00485800 | 0.43240700  | -1.90902700 |
| C                        | 3.28034700  | 0.44856300  | -1.90636300 |
| H                        | 0.63563600  | 4.16058200  | -1.91684400 |
| H                        | 4.37782900  | 0.44369400  | -1.91664400 |

|                          |             |             |             |
|--------------------------|-------------|-------------|-------------|
| H                        | -3.10165700 | 0.43865400  | -1.91720500 |
| H                        | 0.64054800  | -3.27823900 | -1.91699500 |
| C                        | -0.60005300 | 0.38142400  | 2.33057600  |
| C                        | -0.70287700 | -0.99940600 | 2.99616700  |
| H                        | -1.48021700 | 0.53286800  | 1.69647800  |
| H                        | -0.60626800 | 1.16141900  | 3.11015700  |
| H                        | 0.18628900  | -1.22498300 | 3.58397000  |
| C                        | -1.07526700 | -2.13783900 | 2.07014200  |
| H                        | -0.32690800 | -2.19331400 | 1.27054600  |
| H                        | -1.10266100 | -3.09592900 | 2.60146400  |
| H                        | -2.04980700 | -1.96014400 | 1.60278300  |
| N                        | 0.60720300  | 0.46607000  | 1.52449200  |
| Br                       | -2.15102300 | -0.90718200 | 4.52354500  |
| C                        | 1.79593900  | 0.75926400  | 2.30912400  |
| H                        | 2.65864400  | 0.86621300  | 1.64490100  |
| H                        | 1.68032000  | 1.70193600  | 2.87803700  |
| H                        | 2.04331900  | -0.02837200 | 3.04482200  |
| <b>V-Int<sub>3</sub></b> |             |             |             |
| V                        | 3.20789700  | -1.74440200 | 0.71516800  |
| V                        | 0.60780400  | 0.04677200  | 0.51342400  |
| O                        | 3.84134100  | 0.07904900  | 1.20173500  |
| O                        | 1.77485300  | -3.02524300 | 0.20078200  |
| O                        | 3.47339100  | -1.25435000 | -1.33774900 |
| O                        | 2.77209600  | -2.12001700 | 2.78047800  |
| O                        | 0.95533600  | -0.82831000 | 2.47327500  |
| O                        | 1.58278700  | -0.00811300 | -1.37486300 |
| O                        | -0.21560300 | -1.97554500 | -0.00047200 |
| O                        | 2.13364100  | 1.55800000  | 1.14077000  |
| C                        | 3.33039400  | 1.24302000  | 1.31523900  |

|                         |             |             |             |
|-------------------------|-------------|-------------|-------------|
| C                       | 0.52373100  | -2.98155800 | -0.04796500 |
| C                       | 2.60844500  | -0.50818500 | -1.89844900 |
| C                       | 1.70823900  | -1.54701600 | 3.17635000  |
| H                       | 4.06754800  | 2.02157400  | 1.59876100  |
| H                       | 1.40240300  | -1.68435100 | 4.24118100  |
| H                       | 2.75896200  | -0.25726200 | -2.97449000 |
| H                       | 0.09380400  | -3.96318800 | -0.33206000 |
| C                       | -1.72798500 | 0.68880700  | -1.26747400 |
| C                       | -3.18599400 | 1.11231500  | -1.03483300 |
| H                       | -1.67709700 | -0.40544900 | -1.20236900 |
| H                       | -1.42193100 | 0.96488400  | -2.29153600 |
| H                       | -3.26559500 | 2.18380700  | -0.85766100 |
| C                       | -3.93712100 | 0.29163300  | -0.00334600 |
| H                       | -3.37433500 | 0.30372300  | 0.93738400  |
| H                       | -4.94223800 | 0.68461400  | 0.18196800  |
| H                       | -4.01907600 | -0.75265800 | -0.32445900 |
| N                       | -0.85904300 | 1.30059200  | -0.26761700 |
| Br                      | -4.28453800 | 0.94184300  | -2.83999700 |
| C                       | -1.81500100 | 2.17527700  | 2.06365300  |
| O                       | -1.44732400 | 1.24869600  | 2.68720400  |
| O                       | -2.26506000 | 3.18735900  | 1.66650200  |
| C                       | -0.39804900 | 2.60290900  | -0.73784200 |
| H                       | -1.21988700 | 3.33159900  | -0.86714500 |
| H                       | 0.30376300  | 3.03782500  | -0.01685900 |
| H                       | 0.12710500  | 2.52791700  | -1.71119600 |
| <b>V-Ts<sub>2</sub></b> |             |             |             |
| V                       | 3.23995600  | -1.18983100 | 0.08411700  |
| V                       | 0.67178800  | 0.53789500  | -0.09056100 |
| O                       | 3.92241600  | 0.60220800  | 0.57958200  |



|    |             |             |             |
|----|-------------|-------------|-------------|
| O  | 1.83566500  | -2.52006900 | -0.42457200 |
| O  | 3.41959600  | -0.67081400 | -1.94802400 |
| O  | 2.72201900  | -1.50552000 | 2.09871200  |
| O  | 0.87374800  | -0.20798700 | 1.91395900  |
| O  | 1.54469700  | 0.60796500  | -2.06035200 |
| O  | -0.10772900 | -1.41305800 | -0.66539300 |
| O  | 2.19166600  | 2.03651500  | 0.46541200  |
| C  | 3.38782100  | 1.76458900  | 0.67158600  |
| C  | 0.59214900  | -2.45017800 | -0.69267900 |
| C  | 2.57979200  | 0.07832500  | -2.53966400 |
| C  | 1.67063000  | -0.94776800 | 2.54575700  |
| H  | 4.08712300  | 2.57335900  | 0.96531400  |
| H  | 1.42197800  | -1.13256600 | 3.60773400  |
| H  | 2.77853700  | 0.29452300  | -3.60793700 |
| H  | 0.11337900  | -3.41140300 | -0.96550700 |
| C  | -2.50705200 | 0.64162400  | -0.69602600 |
| C  | -3.21059600 | 0.09274500  | 0.55064700  |
| H  | -2.18271800 | -0.19751200 | -1.31682500 |
| H  | -3.26001200 | 1.20739300  | -1.26139700 |
| H  | -3.86185200 | 0.82725400  | 1.00397300  |
| C  | -2.40532500 | -0.67550800 | 1.56904400  |
| H  | -1.68712900 | 0.01098000  | 2.02971800  |
| H  | -3.05743100 | -1.06497800 | 2.35782400  |
| H  | -1.85385700 | -1.50082000 | 1.11404000  |
| N  | -1.30501200 | 1.52057300  | -0.51313600 |
| Br | -4.65973000 | -1.24843900 | -0.24469800 |
| C  | -1.45533585 | 3.14599261  | 0.96179242  |
| O  | -0.86522916 | 2.73451356  | 1.96831455  |
| O  | -2.25696552 | 3.96607440  | 0.48043219  |

|                          |             |             |             |
|--------------------------|-------------|-------------|-------------|
| C                        | -1.05018800 | 2.15886100  | -1.83385600 |
| H                        | -1.91663100 | 2.76709300  | -2.13721700 |
| H                        | -0.17857800 | 2.80661500  | -1.75119100 |
| H                        | -0.86537800 | 1.38994400  | -2.58971900 |
| <b>V-Int<sub>4</sub></b> |             |             |             |
| V                        | -0.82190600 | -0.65992400 | -3.97320300 |
| V                        | -0.86806200 | -0.66621900 | -1.11619100 |
| O                        | -0.83485300 | 1.40842600  | -3.83950100 |
| O                        | -0.82591300 | -2.72444300 | -3.77810500 |
| O                        | -2.97503000 | -0.66592800 | -3.92932100 |
| O                        | 1.30216300  | -0.63902200 | -3.98732600 |
| O                        | 1.11762200  | -0.74264900 | -1.74394100 |
| O                        | -2.85236800 | -0.69815800 | -1.68456000 |
| O                        | -0.91501500 | -2.78139200 | -1.50233000 |
| O                        | -0.93617300 | 1.39544500  | -1.56699800 |
| C                        | -0.87710900 | 1.95148500  | -2.69429700 |
| C                        | -0.86563100 | -3.29963700 | -2.64883800 |
| C                        | -3.48930100 | -0.67963800 | -2.77938800 |
| C                        | 1.77836200  | -0.68348500 | -2.81509600 |
| H                        | -0.86016200 | 3.04480500  | -2.69842200 |
| H                        | 2.88203100  | -0.67208300 | -2.69822200 |
| H                        | -4.59745500 | -0.67712300 | -2.69878300 |
| H                        | -0.85525000 | -4.39401600 | -2.69857300 |
| C                        | 1.96702900  | 0.04459600  | 3.49199000  |
| C                        | 1.82911300  | 1.47960400  | 3.99369000  |
| H                        | 2.82835800  | 0.05125400  | 2.80732300  |
| H                        | 2.20956700  | -0.61801000 | 4.32997300  |
| H                        | 1.26236600  | 2.07180600  | 3.27994500  |
| C                        | 3.14971400  | 2.13141500  | 4.36091900  |

|                         |             |             |             |
|-------------------------|-------------|-------------|-------------|
| H                       | 3.75835600  | 2.21388400  | 3.44943800  |
| H                       | 2.99980000  | 3.13705300  | 4.77244300  |
| H                       | 3.70421100  | 1.53654200  | 5.09635600  |
| N                       | 0.80542500  | -0.46968100 | 2.79587300  |
| Br                      | 0.60048900  | 1.51682900  | 5.67063800  |
| C                       | 0.64506100  | -0.04792000 | 1.45929100  |
| O                       | 1.34017200  | 0.89622600  | 1.05572300  |
| O                       | -0.24757000 | -0.71155500 | 0.78738100  |
| C                       | 0.18224100  | -1.68375200 | 3.29628900  |
| H                       | -0.73320300 | -1.86504200 | 2.73088500  |
| H                       | 0.83502200  | -2.56958200 | 3.18362600  |
| H                       | -0.06646000 | -1.56329300 | 4.35930000  |
| <b>V-Ts<sub>3</sub></b> |             |             |             |
| V                       | 0.00009800  | 0.00002700  | -1.29549400 |
| V                       | -0.00010200 | -0.00002600 | 1.29549600  |
| O                       | -0.00128100 | 2.03527700  | -1.12227000 |
| O                       | 0.00145900  | -2.03523100 | -1.12235200 |
| O                       | -2.06617000 | -0.00134500 | -1.12908700 |
| O                       | 2.06634000  | 0.00139000  | -1.12878100 |
| O                       | 2.06616600  | 0.00131400  | 1.12908100  |
| O                       | -2.06634000 | -0.00136000 | 1.12877500  |
| O                       | 0.00125800  | -2.03527400 | 1.12227400  |
| O                       | -0.00142300 | 2.03523000  | 1.12235700  |
| C                       | -0.00161000 | 2.62186400  | 0.00005600  |
| C                       | 0.00161500  | -2.62186400 | -0.00005100 |
| C                       | -2.64047100 | -0.00154900 | -0.00020000 |
| C                       | 2.64046900  | 0.00154500  | 0.00019400  |
| H                       | -0.00245100 | 3.71941100  | 0.00007900  |
| H                       | 3.73974200  | 0.00252300  | 0.00027900  |

|    |             |             |             |
|----|-------------|-------------|-------------|
| H  | -3.73974400 | -0.00251700 | -0.00028200 |
| H  | 0.00246100  | -3.71941000 | -0.00007200 |
| C  | -0.62833276 | -0.16929951 | 7.04091101  |
| C  | -0.89945887 | -1.62108076 | 6.71964204  |
| H  | -1.59521248 | 0.36495759  | 7.09904082  |
| H  | -0.10270414 | -0.00628512 | 7.98202611  |
| H  | -0.07209039 | -2.24858171 | 6.43347749  |
| C  | -2.30013432 | -2.16948097 | 6.72021539  |
| H  | -2.78225436 | -1.90123928 | 5.77352982  |
| H  | -2.29344715 | -3.25616548 | 6.82595178  |
| H  | -2.87980348 | -1.74832441 | 7.54722808  |
| N  | 0.19246866  | 0.34373411  | 5.95378445  |
| Br | -0.32910852 | -2.44736860 | 9.09707824  |
| C  | -0.17003994 | -0.14651298 | 4.69670245  |
| O  | -0.90499546 | -1.20855458 | 4.85473145  |
| O  | 0.26504345  | 0.44905247  | 3.66685233  |
| C  | 0.76645848  | 1.66547195  | 6.10394948  |
| H  | 1.33083928  | 1.90014365  | 5.20041634  |
| H  | -0.00648786 | 2.44249626  | 6.24300249  |
| H  | 1.43731068  | 1.68642733  | 6.97213815  |

**V-Int<sub>5</sub>**

|   |             |             |             |
|---|-------------|-------------|-------------|
| V | -0.84422500 | -0.66941000 | -4.00443500 |
| V | -0.87426700 | -0.66948000 | -1.14679400 |
| O | -0.85310800 | 1.39056800  | -3.81320100 |
| O | -0.85692700 | -2.73149500 | -3.79734000 |
| O | -3.00225000 | -0.66959900 | -3.97722100 |
| O | 1.27856300  | -0.66997800 | -3.95961700 |
| O | 1.12337900  | -0.68182200 | -1.71354600 |
| O | -2.81652300 | -0.68403100 | -1.74365100 |

|    |             |             |             |
|----|-------------|-------------|-------------|
| O  | -0.88797100 | -2.76274200 | -1.52277700 |
| O  | -0.90457200 | 1.40196200  | -1.54026800 |
| C  | -0.87270400 | 1.95023200  | -2.67653300 |
| C  | -0.86699500 | -3.29894800 | -2.66499400 |
| C  | -3.49263100 | -0.67640700 | -2.81944400 |
| C  | 1.77481500  | -0.67402600 | -2.79817500 |
| H  | -0.86016200 | 3.04480500  | -2.69842200 |
| H  | 2.88203100  | -0.67208300 | -2.69822200 |
| H  | -4.59745500 | -0.67712300 | -2.69878300 |
| H  | -0.85525000 | -4.39401600 | -2.69857300 |
| C  | 1.60839700  | 0.16120000  | 3.65044100  |
| C  | 1.63654900  | 1.40358900  | 2.75021900  |
| H  | 2.57766800  | -0.36081400 | 3.67657200  |
| H  | 1.32285900  | 0.43837700  | 4.67013900  |
| H  | 0.94394500  | 2.15502300  | 3.13803300  |
| C  | 2.99598000  | 2.01021200  | 2.49522100  |
| H  | 3.69268800  | 1.26603200  | 2.08989400  |
| H  | 2.92076700  | 2.84631400  | 1.79130800  |
| H  | 3.36906100  | 2.38614000  | 3.45451700  |
| N  | 0.61258700  | -0.66546800 | 2.96179800  |
| Br | 1.82569500  | 2.54903800  | 6.14736600  |
| C  | 0.41755300  | -0.23281600 | 1.70391700  |
| O  | 1.05165300  | 0.91410600  | 1.47174400  |
| O  | -0.27764700 | -0.81747400 | 0.84419100  |
| C  | 0.14857100  | -1.94041300 | 3.46527000  |
| H  | -0.56397800 | -2.36225400 | 2.75390100  |
| H  | 0.98946300  | -2.63759500 | 3.58833000  |
| H  | -0.33667400 | -1.80147100 | 4.43744100  |

**Fe-HKUST-1**

|    |             |             |             |
|----|-------------|-------------|-------------|
| Fe | 0.00000400  | 0.00000500  | -1.21633500 |
| Fe | 0.00000500  | 0.00001900  | 1.21676100  |
| O  | -0.00099300 | 2.02372700  | -1.12416800 |
| O  | 0.00099600  | -2.02370800 | -1.12418000 |
| O  | -2.04877200 | -0.00085600 | -1.13025500 |
| O  | 2.04878000  | 0.00087300  | -1.13024900 |
| O  | 2.04741900  | 0.00020400  | 1.12977300  |
| O  | -2.04741300 | -0.00030000 | 1.12976700  |
| O  | 0.00011300  | -2.02465000 | 1.12409800  |
| O  | -0.00014600 | 2.02466600  | 1.12411100  |
| C  | -0.00094300 | 2.60182200  | -0.00020800 |
| C  | 0.00091900  | -2.60180300 | -0.00021700 |
| C  | -2.61849000 | -0.00089100 | 0.00001100  |
| C  | 2.61849700  | 0.00083600  | 0.00001700  |
| H  | -0.00133000 | 3.70067700  | -0.00073300 |
| H  | 3.71843500  | 0.00149900  | 0.00081400  |
| H  | -3.71842800 | -0.00158200 | 0.00080600  |
| H  | 0.00130500  | -3.70065900 | -0.00074700 |

**Fe-Int<sub>0</sub>**

|    |             |             |             |
|----|-------------|-------------|-------------|
| Fe | 2.08189600  | 0.17900800  | 0.11497100  |
| Fe | -0.40849200 | -0.12431200 | -0.10423600 |
| O  | 1.73140400  | 1.11307400  | 1.86571500  |
| O  | 2.24637200  | -0.77047500 | -1.65419200 |
| O  | 1.92777000  | 1.94485100  | -0.89810600 |
| O  | 2.20048900  | -1.58366900 | 1.12762600  |
| O  | -0.06113300 | -1.61255300 | 1.24936300  |
| O  | -0.21272800 | 1.40876000  | -1.40789400 |
| O  | 0.06908400  | -1.40250800 | -1.64065300 |

|   |             |             |             |
|---|-------------|-------------|-------------|
| O | -0.50018500 | 1.20651300  | 1.47498200  |
| C | 0.55432400  | 1.49109200  | 2.11093300  |
| C | 1.25172400  | -1.41638100 | -2.08385000 |
| C | 0.82722200  | 2.12770000  | -1.47967100 |
| C | 1.09628800  | -2.04739500 | 1.51643600  |
| H | 0.43969900  | 2.13664100  | 2.96787800  |
| H | 1.13018700  | -2.91871500 | 2.15490900  |
| H | 0.74774400  | 2.99628900  | -2.11763800 |
| H | 1.44155100  | -2.05839400 | -2.93001700 |
| C | -3.12515900 | -0.20517610 | 1.15939467  |
| C | -3.47263100 | 0.43634790  | -0.13884933 |
| H | -2.56658200 | 0.35962490  | 1.90013567  |
| H | -3.77127800 | -0.98817010 | 1.55213867  |
| H | -4.35743100 | 0.03875390  | -0.63824033 |
| C | -3.16856700 | 1.88324590  | -0.44572933 |
| H | -2.96656200 | 2.02506590  | -1.51316233 |
| H | -4.03275600 | 2.50192090  | -0.17317733 |
| H | -2.30063900 | 2.23661290  | 0.11658967  |
| N | -2.36336500 | -0.54468910 | -0.06234733 |
| C | -2.63905200 | -1.87464310 | -0.63369933 |
| H | -2.38692700 | -1.86654810 | -1.69721933 |
| H | -2.01042600 | -2.61263310 | -0.12817033 |
| H | -3.69526800 | -2.15521910 | -0.51097833 |

**Fe-Int<sub>1</sub>**

|    |             |             |             |
|----|-------------|-------------|-------------|
| Fe | 0.41363200  | 0.38750400  | -3.40221400 |
| Fe | 0.43476100  | 0.37554500  | -0.32656900 |
| O  | 0.43027400  | 2.38701500  | -3.16538700 |
| O  | 0.38077600  | -1.62675500 | -3.21714400 |
| O  | -1.61384400 | 0.40640000  | -3.25390200 |

|    |             |             |             |
|----|-------------|-------------|-------------|
| O  | 2.41333600  | 0.35951800  | -3.14917200 |
| O  | 2.44529600  | 0.73484900  | -0.91078500 |
| O  | -1.53858400 | 0.07693700  | -1.01468000 |
| O  | 0.86089500  | -1.58140900 | -1.00232800 |
| O  | 0.16586100  | 2.41016000  | -0.91206800 |
| C  | 0.25229100  | 2.94980500  | -2.03766100 |
| C  | 0.64506700  | -2.15709100 | -2.09189200 |
| C  | -2.12942100 | 0.20658000  | -2.11134300 |
| C  | 2.97995500  | 0.58483400  | -2.03290000 |
| H  | 0.16676800  | 4.04024100  | -2.08194300 |
| H  | 4.07038600  | 0.65494100  | -2.08214700 |
| H  | -3.21841300 | 0.13651000  | -2.07931300 |
| H  | 0.68529200  | -3.24854700 | -2.08292200 |
| C  | -1.29493900 | 0.45761500  | 2.22708500  |
| C  | -0.69086900 | -0.88366300 | 2.37621300  |
| H  | -2.01877200 | 0.64304200  | 1.43809100  |
| H  | -1.37627200 | 1.05344800  | 3.13383900  |
| H  | -0.36304000 | -1.08418200 | 3.39812800  |
| C  | -1.11107400 | -2.08819600 | 1.57201000  |
| H  | -0.27036300 | -2.77563800 | 1.42216200  |
| H  | -1.88808000 | -2.61891400 | 2.13722400  |
| H  | -1.51613800 | -1.81674200 | 0.59399400  |
| N  | 0.09683200  | 0.22192500  | 1.73141900  |
| Br | -0.68888000 | -0.16600800 | 5.86520000  |
| C  | 1.17652900  | 0.79984500  | 2.56718400  |
| H  | 2.10104000  | 0.24325200  | 2.37959900  |
| H  | 1.32541900  | 1.84639500  | 2.27831700  |
| H  | 0.91939200  | 0.73848000  | 3.63277500  |



**Fe-Ts<sub>1</sub>**

|    |             |             |             |
|----|-------------|-------------|-------------|
| Fe | -0.00054000 | 0.00014700  | -1.19374800 |
| Fe | 0.00043500  | -0.00007400 | 1.38086100  |
| O  | -0.13713400 | 1.95079900  | -1.17840300 |
| O  | 0.13623600  | -1.95043800 | -1.17885200 |
| O  | -1.95153200 | -0.13651000 | -1.17669200 |
| O  | 1.95024600  | 0.13690000  | -1.17787000 |
| O  | 2.01767200  | 0.14682800  | 1.08565800  |
| O  | -2.01670200 | -0.14757100 | 1.08688500  |
| O  | 0.14807200  | -2.01741900 | 1.08457700  |
| O  | -0.14636900 | 2.01725700  | 1.08504600  |
| C  | -0.18192700 | 2.54923900  | -0.06284000 |
| C  | 0.18197500  | -2.54915300 | -0.06344900 |
| C  | -2.54928000 | -0.18205000 | -0.06084300 |
| C  | 2.54909600  | 0.18186500  | -0.06253000 |
| H  | -0.25933300 | 3.64443700  | -0.10280800 |
| H  | 3.64428500  | 0.25913700  | -0.10301200 |
| H  | -3.64451400 | -0.25929400 | -0.10017800 |
| H  | 0.25919100  | -3.64435100 | -0.10378700 |
| C  | -0.84370735 | -0.04461675 | 4.50088603  |
| C  | -0.71590529 | -1.48361221 | 4.77568157  |
| H  | -1.77685350 | 0.23249229  | 4.00647297  |
| H  | -0.64401658 | 0.61849042  | 5.35003678  |
| H  | 0.13306269  | -1.78896987 | 5.37035130  |
| C  | -1.43218598 | -2.52786627 | 3.96746680  |
| H  | -0.94633046 | -2.66217146 | 2.99442120  |
| H  | -1.42452809 | -3.48024623 | 4.50373850  |
| H  | -2.47370171 | -2.23617832 | 3.79854518  |
| N  | 0.26951819  | -0.21705300 | 3.57222128  |

|                           |             |             |             |
|---------------------------|-------------|-------------|-------------|
| Br                        | -2.08602279 | -1.79161606 | 7.05185281  |
| C                         | 1.54863978  | 0.16454665  | 4.15971108  |
| H                         | 2.37025304  | -0.18506969 | 3.52841449  |
| H                         | 1.62838323  | 1.26401735  | 4.24854339  |
| H                         | 1.69020987  | -0.25066436 | 5.17146290  |
| <b>Fe-Int<sub>2</sub></b> |             |             |             |
| Fe                        | 0.42636200  | 0.39872400  | -3.36359500 |
| Fe                        | 0.42044300  | 0.40231400  | -0.21084300 |
| O                         | 0.46876600  | 2.41873400  | -3.21177500 |
| O                         | 0.38776900  | -1.62174900 | -3.20331800 |
| O                         | -1.57911000 | 0.43789600  | -3.16728700 |
| O                         | 2.43415300  | 0.35312700  | -3.17523100 |
| O                         | 2.43234500  | 0.74688700  | -0.93766800 |
| O                         | -1.58296100 | 0.03632800  | -0.93111300 |
| O                         | 0.77459300  | -1.59979300 | -0.96482100 |
| O                         | 0.06809400  | 2.38567200  | -0.97606000 |
| C                         | 0.23243400  | 2.94886400  | -2.07627100 |
| C                         | 0.61796700  | -2.15726200 | -2.07025200 |
| C                         | -2.12774800 | 0.20134400  | -2.04203900 |
| C                         | 2.97948300  | 0.58743400  | -2.04807300 |
| H                         | 0.16676800  | 4.04024100  | -2.08194300 |
| H                         | 4.07038600  | 0.65494100  | -2.08214700 |
| H                         | -3.21841300 | 0.13651000  | -2.07931300 |
| H                         | 0.68529200  | -3.24854700 | -2.08292200 |
| C                         | -0.67412500 | 0.05055500  | 2.56764000  |
| C                         | -0.41544700 | -1.33018100 | 3.18844100  |
| H                         | -1.59807000 | -0.00092600 | 1.97557700  |
| H                         | -0.83954300 | 0.78864500  | 3.37349100  |
| H                         | 0.54099500  | -1.35423100 | 3.71045500  |

|    |             |             |            |
|----|-------------|-------------|------------|
| C  | -0.58636700 | -2.50610900 | 2.24985700 |
| H  | 0.08945400  | -2.36898100 | 1.39663000 |
| H  | -0.35061500 | -3.45455800 | 2.74375300 |
| H  | -1.61159400 | -2.55317900 | 1.86519200 |
| N  | 0.44396600  | 0.41676300  | 1.73197800 |
| Br | -1.73835100 | -1.61730100 | 4.82266500 |
| C  | 1.53416000  | 1.04295100  | 2.45259200 |
| H  | 2.31568400  | 1.35434500  | 1.74985100 |
| H  | 1.20116700  | 1.94392800  | 3.00793300 |
| H  | 2.01969300  | 0.37756000  | 3.19375700 |

**Fe-Int<sub>3</sub>**

|    |             |             |             |
|----|-------------|-------------|-------------|
| Fe | 0.33123200  | 0.35773200  | -3.41705800 |
| Fe | 0.34991200  | 0.34017300  | -0.38703200 |
| O  | 0.40954900  | 2.40697000  | -3.36194800 |
| O  | 0.26744700  | -1.67653700 | -3.28718900 |
| O  | -1.63631900 | 0.44763100  | -3.17185000 |
| O  | 2.29331300  | 0.28909100  | -3.12434800 |
| O  | 2.45588300  | 0.71778500  | -0.89175100 |
| O  | -1.73526900 | -0.04762400 | -0.95043500 |
| O  | 0.73917200  | -1.64641700 | -1.06408900 |
| O  | -0.00874500 | 2.29907600  | -1.13371600 |
| C  | 0.16086300  | 2.90034700  | -2.21716100 |
| C  | 0.53817700  | -2.20823800 | -2.16392000 |
| C  | -2.22324100 | 0.15579100  | -2.07710400 |
| C  | 2.91116300  | 0.54115200  | -2.03933800 |
| H  | 0.08389800  | 3.98867200  | -2.17269500 |
| H  | 3.98751600  | 0.60337200  | -2.17289900 |
| H  | -3.30128300 | 0.08494100  | -2.17006500 |
| H  | 0.60242200  | -3.30011600 | -2.17367400 |

|                          |             |             |             |
|--------------------------|-------------|-------------|-------------|
| C                        | -1.08623800 | 0.27930100  | 2.24378700  |
| C                        | -0.89928900 | -0.91254800 | 3.18664100  |
| H                        | -1.87689700 | 0.03378300  | 1.52470900  |
| H                        | -1.42969300 | 1.15384400  | 2.82434600  |
| H                        | -0.07583500 | -0.74534000 | 3.88233900  |
| C                        | -0.82807700 | -2.26691600 | 2.51008400  |
| H                        | 0.00006600  | -2.25288400 | 1.79193800  |
| H                        | -0.65956200 | -3.07419700 | 3.23132500  |
| H                        | -1.75177800 | -2.47394300 | 1.95697200  |
| N                        | 0.16679300  | 0.53889400  | 1.56411100  |
| Br                       | -2.53397100 | -0.98370100 | 4.55302100  |
| C                        | 3.16840700  | -1.43822700 | 2.35109000  |
| O                        | 3.51699400  | -0.53989600 | 3.01579500  |
| O                        | 2.85995900  | -2.36761500 | 1.71241200  |
| C                        | 0.98824600  | 1.49772600  | 2.28104500  |
| H                        | 1.24358400  | 1.18543000  | 3.31178400  |
| H                        | 1.93487300  | 1.65115500  | 1.75137800  |
| H                        | 0.49017900  | 2.48667900  | 2.36969500  |
| <b>Fe-Ts<sub>2</sub></b> |             |             |             |
| Fe                       | -0.00054000 | 0.00014700  | -1.19374800 |
| Fe                       | 0.00043500  | -0.00007400 | 1.38086100  |
| O                        | -0.13713400 | 1.95079900  | -1.17840300 |
| O                        | 0.13623600  | -1.95043800 | -1.17885200 |
| O                        | -1.95153200 | -0.13651000 | -1.17669200 |
| O                        | 1.95024600  | 0.13690000  | -1.17787000 |
| O                        | 2.01767200  | 0.14682800  | 1.08565800  |
| O                        | -2.01670200 | -0.14757100 | 1.08688500  |
| O                        | 0.14807200  | -2.01741900 | 1.08457700  |
| O                        | -0.14636900 | 2.01725700  | 1.08504600  |

|                           |             |             |             |
|---------------------------|-------------|-------------|-------------|
| C                         | -0.18192700 | 2.54923900  | -0.06284000 |
| C                         | 0.18197500  | -2.54915300 | -0.06344900 |
| C                         | -2.54928000 | -0.18205000 | -0.06084300 |
| C                         | 2.54909600  | 0.18186500  | -0.06253000 |
| H                         | -0.25933300 | 3.64443700  | -0.10280800 |
| H                         | 3.64428500  | 0.25913700  | -0.10301200 |
| H                         | -3.64451400 | -0.25929400 | -0.10017800 |
| H                         | 0.25919100  | -3.64435100 | -0.10378700 |
| C                         | -1.12298391 | 0.36312497  | 4.39020238  |
| C                         | -1.37220752 | -1.07755720 | 4.84549566  |
| H                         | -2.03342770 | 0.73713938  | 3.88899411  |
| H                         | -0.99203983 | 0.97439312  | 5.29642969  |
| H                         | -0.56553959 | -1.43891035 | 5.48133987  |
| C                         | -1.74440312 | -2.08355568 | 3.78160191  |
| H                         | -0.88645389 | -2.22392821 | 3.11404872  |
| H                         | -1.98816934 | -3.05437762 | 4.22558416  |
| H                         | -2.59035999 | -1.73628275 | 3.18122847  |
| N                         | 0.06582503  | 0.51622176  | 3.53688521  |
| Br                        | -2.94389774 | -0.98453252 | 6.22571264  |
| C                         | 1.82267617  | -0.62138833 | 4.46716708  |
| O                         | 2.33759068  | 0.24139375  | 5.10187846  |
| O                         | 1.66778366  | -1.71846019 | 4.04101553  |
| C                         | 0.51019323  | 1.91520285  | 3.61531058  |
| H                         | 0.83212448  | 2.16544583  | 4.63875418  |
| H                         | 1.36467210  | 2.07494967  | 2.94984571  |
| H                         | -0.28368178 | 2.62103855  | 3.31835858  |
| <b>Fe-Int<sub>4</sub></b> |             |             |             |
| Fe                        | 1.12086800  | -0.00840000 | -0.18289700 |
| Fe                        | 4.21467100  | 0.03957200  | 0.33342600  |

|    |             |             |             |
|----|-------------|-------------|-------------|
| O  | 1.81075700  | 2.02972700  | -0.01808900 |
| O  | 1.88489300  | -1.98657300 | -0.12310800 |
| O  | 1.44577000  | -0.05655500 | 1.94041800  |
| O  | 2.14332100  | 0.06074800  | -2.08572600 |
| O  | 4.33705600  | 0.46614500  | -1.63750600 |
| O  | 3.67858800  | -0.39075800 | 2.23957800  |
| O  | 4.15473000  | -1.95242800 | -0.09559200 |
| O  | 3.96153800  | 2.02351000  | 0.72952100  |
| C  | 2.85223100  | 2.56657400  | 0.41460800  |
| C  | 3.01474900  | -2.51395900 | -0.17888800 |
| C  | 2.46542500  | -0.28832600 | 2.62346500  |
| C  | 3.32089800  | 0.33246900  | -2.39854600 |
| H  | 2.81370000  | 3.65073800  | 0.55571300  |
| H  | 3.53493600  | 0.47284200  | -3.45418500 |
| H  | 2.31918600  | -0.42324900 | 3.69524400  |
| H  | 3.03707600  | -3.60093300 | -0.31530400 |
| C  | -4.14747600 | -0.68589000 | -1.14743500 |
| C  | -4.90824300 | -0.92675000 | 0.16406900  |
| H  | -3.84334600 | -1.67894200 | -1.50794400 |
| H  | -4.82610600 | -0.25272300 | -1.89214400 |
| H  | -4.20329600 | -1.04766000 | 0.98623400  |
| C  | -5.90393000 | -2.06878700 | 0.08342700  |
| H  | -5.34889000 | -2.99749000 | -0.10700700 |
| H  | -6.45890500 | -2.18677500 | 1.01883000  |
| H  | -6.62421300 | -1.91235400 | -0.72896900 |
| N  | -2.96893300 | 0.14582000  | -1.01393100 |
| Br | -5.92975000 | 0.79847800  | 0.69798400  |
| C  | -1.80712900 | -0.47576000 | -0.52896200 |
| O  | -1.89703200 | -1.61838600 | -0.06632900 |

|                          |             |             |             |
|--------------------------|-------------|-------------|-------------|
| O                        | -0.73989200 | 0.26315600  | -0.61464700 |
| C                        | -2.93405800 | 1.42736700  | -1.70073300 |
| H                        | -2.00122800 | 1.92826100  | -1.44333300 |
| H                        | -2.97194900 | 1.30937300  | -2.79876500 |
| H                        | -3.77983900 | 2.05067300  | -1.38821700 |
| <b>Fe-Ts<sub>3</sub></b> |             |             |             |
| Fe                       | -0.00054000 | 0.00014700  | -1.19374800 |
| Fe                       | 0.00043500  | -0.00007400 | 1.38086100  |
| O                        | -0.13713400 | 1.95079900  | -1.17840300 |
| O                        | 0.13623600  | -1.95043800 | -1.17885200 |
| O                        | -1.95153200 | -0.13651000 | -1.17669200 |
| O                        | 1.95024600  | 0.13690000  | -1.17787000 |
| O                        | 2.01767200  | 0.14682800  | 1.08565800  |
| O                        | -2.01670200 | -0.14757100 | 1.08688500  |
| O                        | 0.14807200  | -2.01741900 | 1.08457700  |
| O                        | -0.14636900 | 2.01725700  | 1.08504600  |
| C                        | -0.18192700 | 2.54923900  | -0.06284000 |
| C                        | 0.18197500  | -2.54915300 | -0.06344900 |
| C                        | -2.54928000 | -0.18205000 | -0.06084300 |
| C                        | 2.54909600  | 0.18186500  | -0.06253000 |
| H                        | -0.25933300 | 3.64443700  | -0.10280800 |
| H                        | 3.64428500  | 0.25913700  | -0.10301200 |
| H                        | -3.64451400 | -0.25929400 | -0.10017800 |
| H                        | 0.25919100  | -3.64435100 | -0.10378700 |
| C                        | -1.00708114 | -1.02417704 | -6.83827108 |
| C                        | -2.25004568 | -1.62145767 | -6.22783997 |
| H                        | -0.25888142 | -1.83323119 | -6.94572319 |
| H                        | -1.11228683 | -0.54202685 | -7.81088504 |
| H                        | -2.99323866 | -0.96522000 | -5.80682000 |

|    |             |             |             |
|----|-------------|-------------|-------------|
| C  | -2.41538269 | -3.11251134 | -6.11612085 |
| H  | -1.88581791 | -3.45397789 | -5.21983720 |
| H  | -3.47021503 | -3.38427577 | -6.03793778 |
| H  | -1.99543778 | -3.61581496 | -6.99271913 |
| N  | -0.57556742 | -0.02760888 | -5.87134793 |
| Br | -3.56939848 | -1.37466074 | -8.38975472 |
| C  | -0.70980957 | -0.44723469 | -4.53299711 |
| O  | -1.57179699 | -1.45381809 | -4.56896212 |
| O  | -0.07752461 | 0.18271053  | -3.64240963 |
| C  | 0.51157584  | 0.84809724  | -6.25804862 |
| H  | 0.73447347  | 1.50804569  | -5.41838421 |
| H  | 1.43156608  | 0.28959491  | -6.51245234 |
| H  | 0.22024190  | 1.44738510  | -7.13051056 |

**Fe-Int<sub>5</sub>**

|    |             |             |            |
|----|-------------|-------------|------------|
| Fe | 0.47524900  | 0.43435600  | 1.22564400 |
| Fe | 0.48181900  | 0.44958100  | 4.15248500 |
| O  | 0.52230600  | 2.55906100  | 1.61324500 |
| O  | 0.47066400  | -1.67341900 | 1.59877900 |
| O  | -1.50486700 | 0.46858200  | 1.79144500 |
| O  | 2.48098800  | 0.39856400  | 1.78202500 |
| O  | 2.49231000  | 0.79861600  | 4.01441100 |
| O  | -1.52612300 | 0.08807600  | 4.02565500 |
| O  | 0.83244800  | -1.47828100 | 3.83628400 |
| O  | 0.12892600  | 2.37488200  | 3.84670300 |
| C  | 0.29700100  | 3.01111000  | 2.75345200 |
| C  | 0.67872600  | -2.12035300 | 2.74645100 |
| C  | -2.06967800 | 0.24725300  | 2.89164600 |
| C  | 3.03870500  | 0.63413500  | 2.88247800 |
| H  | 0.22571900  | 4.09020300  | 2.86410000 |



|    |             |             |             |
|----|-------------|-------------|-------------|
| H  | 4.12933700  | 0.70490300  | 2.86389600  |
| H  | -3.15946200 | 0.18647200  | 2.86673000  |
| H  | 0.74424300  | -3.19858500 | 2.86312100  |
| C  | 0.31524200  | -0.61851200 | -4.00751300 |
| C  | -0.89349500 | -1.20249100 | -3.25919100 |
| H  | 1.11068300  | -1.36404400 | -4.16903500 |
| H  | 0.00749500  | -0.20890900 | -4.96749200 |
| H  | -1.80058200 | -0.68017800 | -3.56657800 |
| C  | -1.07624600 | -2.70249400 | -3.33142000 |
| H  | -0.23784000 | -3.21584900 | -2.84869500 |
| H  | -2.00658100 | -2.99827700 | -2.81352800 |
| H  | -1.15494400 | -2.98554800 | -4.38556700 |
| N  | 0.76597500  | 0.40440500  | -3.06064900 |
| Br | -2.01620000 | -1.14852500 | -6.32107200 |
| C  | 0.27668900  | 0.15830800  | -1.83171700 |
| O  | -0.63311300 | -0.81168300 | -1.84620600 |
| O  | 0.61296900  | 0.76513100  | -0.79449700 |
| C  | 1.85052600  | 1.32418300  | -3.32516100 |
| H  | 1.97086800  | 1.98296100  | -2.46287200 |
| H  | 2.79245600  | 0.78327200  | -3.49794800 |
| H  | 1.62021600  | 1.91992300  | -4.21508900 |
